# Supplementary material
Source: PubMed Central journal article supplement (PMC8094168)
Supplement: NIHMS1693925-supplement-Main_Supporting_Info.pdf [file NIHMS1693925-supplement-Main_Supporting_Info.pdf]

**Supplementary Information for:**

**“Structural Characterization of the [CuOR]<sup>2+</sup> Core”**

V. Mahesh Krishnan<sup>‡</sup>, Dimitar Y. Shopov<sup>‡</sup>, Caitlin J. Bouchey, Wilson D. Bailey, Riffat Parveen, Bess Vlasisavljevich,\* and William B. Tolman\*

## TABLE OF CONTENTS

|                                                                                       |    |
|---------------------------------------------------------------------------------------|----|
| <b>General Comments</b> .....                                                         | 4  |
| <b>I. SYNTHESIS</b> .....                                                             | 6  |
| Synthesis of $H_2L^{OMe}$ .....                                                       | 6  |
| Synthesis of $L^{OMe}Cu(CH_3CN)$ .....                                                | 8  |
| Synthesis of $[NBu_4][Cu(L^{OMe})(OH)]$ .....                                         | 9  |
| Synthesis of $[NBu_4][L^H CuOCH_2CF_3]$ .....                                         | 10 |
| Synthesis of $[NBu_4][L^{OMe}CuOCH_2CF_3]$ .....                                      | 11 |
| <b>II. UV-VISIBLE SPECTRA FOR Cu(II) COMPLEXES</b> .....                              | 12 |
| <b>III. EPR SPECTROSCOPY</b> .....                                                    | 14 |
| <b>IV. CYCLIC VOLTAMMETRY</b> .....                                                   | 17 |
| Reduction potential of $L^H CuOH$ .....                                               | 25 |
| <b>V. CHEMICAL FORMATION OF <math>L^Y CuOR</math> SPECIES</b> .....                   | 26 |
| General Procedures .....                                                              | 26 |
| $L^{OMe}CuOH$ .....                                                                   | 26 |
| $L^H CuOCH_2CF_3$ .....                                                               | 27 |
| $L^{OMe}CuOCH_2CF_3$ .....                                                            | 27 |
| Chemical Reversibility Experiments.....                                               | 27 |
| <b>VI. NMR SPECTROSCOPY OF <math>L^Y CuOR</math></b> .....                            | 31 |
| General Procedure .....                                                               | 31 |
| $^1H$ NMR Analysis of $L^Y CuOH$ ( $Y = -H, -OMe$ ).....                              | 31 |
| $^1H$ NMR Analysis of $L^H CuOCH_2CF_3$ .....                                         | 34 |
| $^1H$ NMR Analysis of $L^{OMe}CuOCH_2CF_3$ .....                                      | 35 |
| $^{13}C \{^1H\}$ NMR Spectrum of $L^{OMe}CuOCH_2CF_3$ .....                           | 36 |
| <b>VII. SOLUTION STABILITY OF OXIDIZED Cu SPECIES</b> .....                           | 37 |
| Analysis of Room Temperature Self-Decay Experiments .....                             | 39 |
| <b>VIII. PHENOL REACTIVITY OF <math>[CuOR]^{2+}</math> SPECIES</b> .....              | 40 |
| General procedure for the reaction of $[CuOR]^{2+}$ complexes with $^{ttb}PhOH$ ..... | 40 |
| <b>IX. CRYSTALLIZATION AND ISOLATION OF <math>[CuOR]^{2+}</math> SPECIES</b> .....    | 46 |
| $L^{OMe}CuOH$ .....                                                                   | 46 |
| $L^H CuOCH_2CF_3$ .....                                                               | 46 |
| $L^{OMe}CuOCH_2CF_3$ .....                                                            | 48 |

|                                                                                                         |           |
|---------------------------------------------------------------------------------------------------------|-----------|
| <b>X. X-RAY CRYSTALLOGRAPHY .....</b>                                                                   | <b>50</b> |
| <b>XI. RESONANCE RAMAN SPECTROSCOPY OF L<sup>Y</sup>CuOR.....</b>                                       | <b>57</b> |
| General Comments:.....                                                                                  | 57        |
| General preparation of L <sup>Y</sup> CuOR for Raman spectroscopy .....                                 | 57        |
| Sample preparation rR spectrum of L <sup>OMe</sup> CuOH .....                                           | 58        |
| Sample preparation rR Spectrum of L <sup>Y</sup> CuOCH <sub>2</sub> CF <sub>3</sub> (Y = -H, -OMe)..... | 58        |
| <b>XII. DENSITY FUNCTIONAL THEORY .....</b>                                                             | <b>61</b> |
| Computational Details.....                                                                              | 61        |
| Summary of Calculated Properties.....                                                                   | 61        |
| UV-visible Spectra .....                                                                                | 63        |
| DFT Frontier Molecular Orbitals .....                                                                   | 71        |
| DFT Raman Spectra .....                                                                                 | 75        |
| <b>XIII. REFERENCES .....</b>                                                                           | <b>77</b> |

## General Comments

Unless otherwise indicated, all reagents were purchased from commercial sources. All experiments were carried out under inert atmosphere in a N<sub>2</sub>-filled glovebox or under Ar using Schlenk techniques; all glassware was oven-dried at 160 °C or flame-dried prior to use. UV-vis spectra were obtained using an HP8453 (190-1100 nm) diode array spectrophotometer equipped with a Unisoku low temperature cell holder. Kinetic data were analyzed using ReactLab KINETICS.<sup>1</sup> Cyclic voltammetry (CV) experiments were performed on an EC Epsilon potentiostat from BASi using a three-electrode cell comprised of a freshly polished Pt or glassy carbon (GC) working electrode, Pt counter electrode, and Ag wire pseudoreference electrode submerged in THF or CH<sub>2</sub>Cl<sub>2</sub> with 0.2M tetrabutylammonium hexafluorophosphate (NBu<sub>4</sub>PF<sub>6</sub>, TBAP) as the electrolyte and either acetylferrocene (AcFc) or decamethylferrocene (Fc\*) as an internal standard. The electrolyte, TBAP, was recrystallized several times from ethanol and dried overnight under high-vacuum before use. All potentials were referenced against the ferrocenium/ferrocene (Fc/Fc<sup>+</sup>) redox couple using independent measurements (THF) or known E<sub>1/2</sub> values (CH<sub>2</sub>Cl<sub>2</sub>).<sup>2</sup> Unless otherwise noted, all solvents were purified and degassed with argon via a solvent system using alumina columns and dispensing directly into the glovebox. 1,2-difluorobenzene (DFB) was purified over acidified KMnO<sub>4</sub>, dried with CaH<sub>2</sub>, degassed via 4 freeze-pump-thaw cycles, collected via vacuum distillation, and subsequently stored in a glovebox over 3A activated molecular sieves. Ferrocenium tetra(3,5-bis-trifluoromethylphenyl)borate (FcBAr<sup>F</sup><sub>4</sub>) was prepared using reported procedure.<sup>3</sup> Acetylferrocenium tetrakis[3,5-bis(trifluoromethyl)phenyl]borate (AcFcBAr<sup>F</sup><sub>4</sub>) and [NBu<sub>4</sub>][L<sup>H</sup>CuOH] were prepared as described.<sup>4,5</sup> Dimethyl 4-methoxypyridine-2,6-dicarboxylate was prepared following a reported procedure.<sup>6</sup> Lithium 2,6-diisopropylanilide



(LiNHdipp) was prepared by addition of *n*-BuLi to a solution of 2,6-diisopropylaniline in pentane; the resulting precipitate was collected via filtration, washed with pentane, and used without further purification. 2,4,6-tri-*tert*-butylphenol (<sup>tb</sup>PhOH) was triply recrystallized from a saturated pentane solution at -30 °C prior to use. Elemental Analysis (CHN) was performed by the CENTC Elemental Analysis Facility (University of Rochester). Nuclear magnetic resonance (NMR) spectroscopy experiments were performed with either Varian Unity Inova (500 MHz) or Varian 300 MHz spectrometers; all deuterated solvents (chloroform-*d* (CDCl<sub>3</sub>), dichloromethane-*d*<sub>2</sub> (CD<sub>2</sub>Cl<sub>2</sub>, CH<sub>2</sub>Cl<sub>2</sub>-*d*<sub>2</sub>), 1,2-dichlorobenzene-*d*<sub>4</sub> (DCB-*d*<sub>4</sub>)) were purchased from Cambridge Isotope Laboratories or Sigma-Aldrich, degassed, and dried over activated 3A molecular sieves prior to use. EPR simulations were performed using the EasySpin EPR simulation package, v. 5.1.<sup>7</sup> Experimental details regarding X-ray crystallography and resonance Raman spectroscopy are provided in their respective sections below.

## I. SYNTHESIS

### Synthesis of H<sub>2</sub>L<sup>OMe</sup>

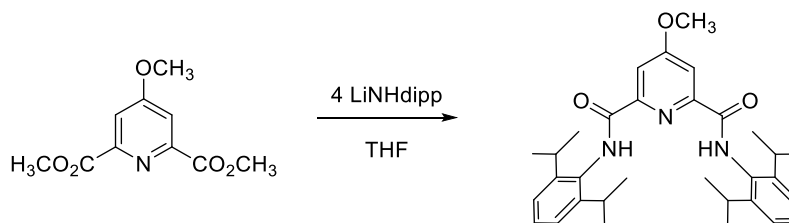

In a glovebox, a 100 mL round-bottom flask was charged with dimethyl 4-methoxy-2,6-pyridinedicarboxylate (553 mg, 2.5 mmol, 1 eq) and THF (25 mL); the mixture was stirred until homogeneous. To this stirred solution, LiNHdipp (1.8 g, 9.8 mmol, 3.9 eq) was added over the course of 10 min, forming an orange-hued homogeneous reaction mixture which was allowed to stir for 12h. After this time, the reaction was removed from the glovebox and quenched with dropwise addition of sat. aq. NH<sub>4</sub>Cl (30 mL). The resulting mixture was extracted with CH<sub>2</sub>Cl<sub>2</sub> (3 x 30 mL); the pooled organic fractions were then washed with H<sub>2</sub>O (1 x 30 mL), brine (1 x 30 mL), dried over MgSO<sub>4</sub>, and dried *in vacuo* to yield a yellow oil. Trituration with hexanes (2 x 30 mL) yielded crude material as an off-white powder. The crude material was further purified via chromatography (silica, 75:25 Hexanes:EtOAc) to furnish H<sub>2</sub>L<sup>OMe</sup> (842 mg, 1.63 mmol, 65%) as a white powder. <sup>1</sup>H NMR (500 MHz, CDCl<sub>3</sub>): δ (ppm) 9.05 (s, 2H, -NH), 8.04 (s, 2H, 3,5-py -CH), 7.36 (t, *J* = 7.7 Hz, 2H, arm arene *p*-CH), 7.24 (d, *J* = 7.8 Hz, 4H, arm arene *m*-CH), 4.05 (s, 3H, Py *p*-CH<sub>3</sub>), 3.14 (septet, *J* = 7.0 Hz, 2H, *i*-Pr -CH), 1.23 (d, *J* = 6.9 Hz, 24H, *i*-Pr 2xCH<sub>3</sub>). <sup>13</sup>C {<sup>1</sup>H} NMR (126 MHz, CDCl<sub>3</sub>): δ(ppm) 169.06 (carbonyl), 162.76 (Py, *para*), 150.97 (Py, *ortho*), 146.17 (arm arene, *ortho*), 130.93 (arm arene, *para*), 128.66 (arm arene, *ipso*), 123.73 (arm arene, *meta*), 111.73 (Py, *meta*), 56.37 (*i*-Pr -CH), 29.15 (Py *p*-CH<sub>3</sub>), 23.69 (*i*-Pr -CH<sub>3</sub>). Anal. calcd (%) for C<sub>36</sub>H<sub>49</sub>N<sub>3</sub>O<sub>5</sub> (as H<sub>2</sub>L<sup>OMe</sup>•EtOAc, 603.80): C, 73.0; H, 8.10; N, 7.51; Found: C, 72.3; H, 8.28; N, 7.17.

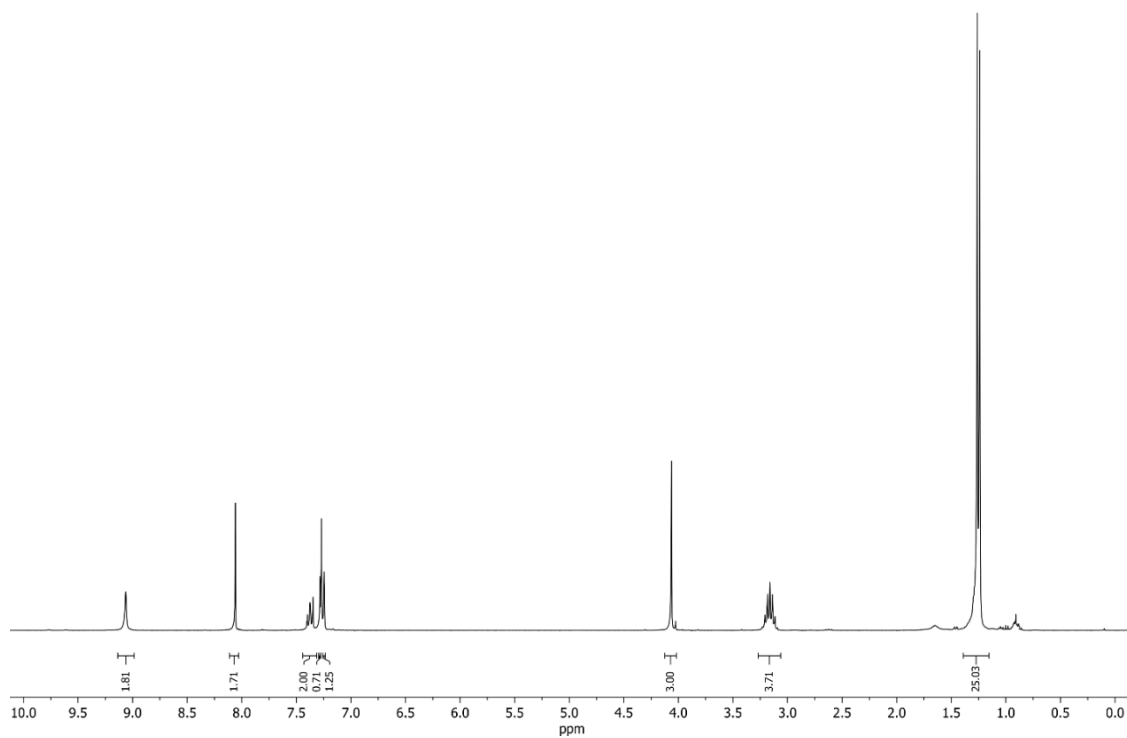

**Figure S1.**  $^1\text{H}$  NMR spectrum of  $\text{H}_2\text{L}^{\text{OMe}}$  (500 MHz,  $\text{CDCl}_3$ ).

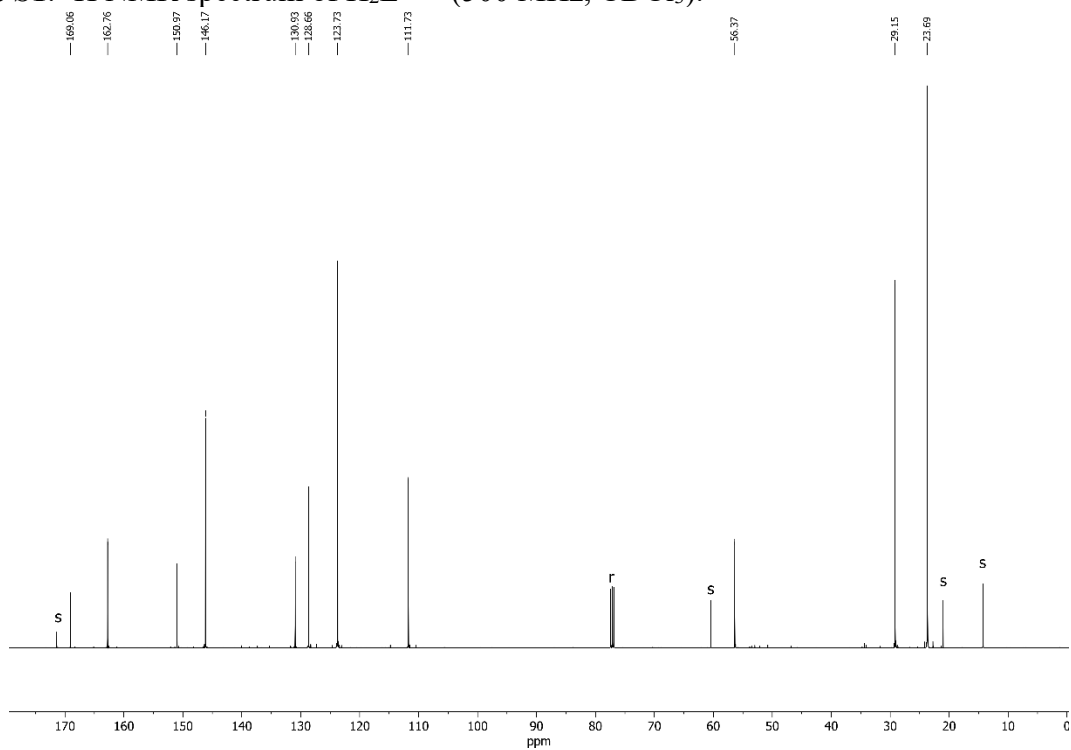

**Figure S2.**  $^{13}\text{C}\{^1\text{H}\}$  NMR spectrum of  $\text{H}_2\text{L}^{\text{OMe}}$  (126 MHz,  $\text{CDCl}_3$ ). Signals arising from solvent residuals ("r") and traces of ethyl acetate ("s") are indicated.

## Synthesis of $L^{OMe}Cu(CH_3CN)$

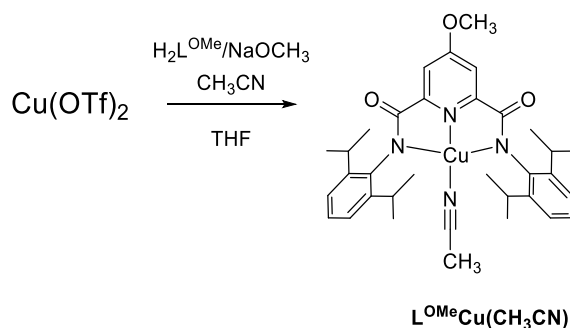

In a glovebox, a 100 mL round-bottom flask was charged with  $CuOTf_2$  (420 mg, 1.2 mmol, 1 eq) and  $H_2L^{OMe}$  (832 mg, 1.7 mmol, 1 eq). The reagents were then stirred in THF (40 mL), forming a homogeneous solution with a light green tint. Then NaOMe (0.5 M in MeOH, 6.3 mL, 3.2 mmol, 2 eq) was added to the stirred reaction mixture dropwise over 5 min (a rapid color change to dark green was observed during this addition) and allowed to stir for 12 h. The reaction mixture was then exhaustively dried *in vacuo*, yielding a deep green residue. The residue was dissolved in 40 mL of  $CH_3CN$  to yield a mahogany solution; the solvent was then removed *in vacuo* to yield a purple residue. Treatment with  $CH_3CN$  and subsequent solvent removal was repeated a total of 3x to ensure complete THF removal. The resulting purple residue was then dissolved in 40 mL of alumina-treated  $CH_2Cl_2$ ,<sup>8</sup> stirred for 20 min, filtered over Celite to remove NaOTf, and dried *in vacuo* to yield crude  $L^{OMe}Cu(CH_3CN)$  as a mahogany solid. Selective precipitation using  $CH_3CN/Et_2O$ /pentane yielded purified product (811 mg, 1.30 mmol, 77%) Crystals suitable for X-ray diffraction were obtained by vapor diffusion using  $CH_2Cl_2$ /heptane. UV-Vis ( $CH_3CN$ , RT):  $\lambda_{max}(\epsilon)$  325(4450), 402(2850), 539(630). Anal. calcd (%) for  $C_{34}H_{42}CuN_4O_3$  (618.28): C, 66.05; H, 6.85; N, 9.06; Found: C, 66.10; H, 6.94; N, 8.72.

## Synthesis of $[\text{NBu}_4][\text{Cu}(\text{L}^{\text{OMe}})(\text{OH})]$

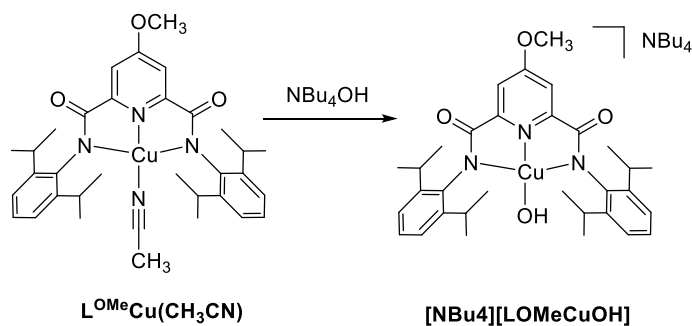

In a glovebox, a 100 mL round-bottom flask was charged with  $\text{L}^{\text{OMe}}\text{Cu}(\text{CH}_3\text{CN})$  (250 mg, 0.40 mmol, 1 eq) and dissolved in THF (30 mL).  $\text{NBu}_4\text{OH}$  (1M in MeOH, 0.40 mL, 0.40 mmol, 1 eq) was added dropwise to the stirred reaction mixture, causing the immediate formation of a dark blue solution. The mixture was stirred for 12 h and then dried under dynamic vacuum. The residue was then dissolved in a minimal amount of THF (~2 mL) and precipitated via dropwise addition of  $\text{Et}_2\text{O}$ . The mother liquor was decanted, and the process repeated two more times. The resulting material was dried exhaustively *in vacuo* yielding  $[\text{NBu}_4][\text{L}^{\text{OMe}}\text{CuOH}]$  (246 mg, 0.30 mmol, 76%) as a deep blue solid. UV-Vis (THF,  $-80^\circ\text{C}$ ):  $\lambda_{\text{max}}(\epsilon)$  307(10500), 385(1350), 605(357). Anal. calcd (%) for  $\text{C}_{48}\text{H}_{76}\text{CuN}_4\text{O}_4$  (836.71) : C, 68.90; H, 9.16; N, 6.70; Found: C, 68.73; H, 9.18; N, 6.56.

## Synthesis of $[\text{NBu}_4][\text{L}^{\text{H}}\text{CuOCH}_2\text{CF}_3]$

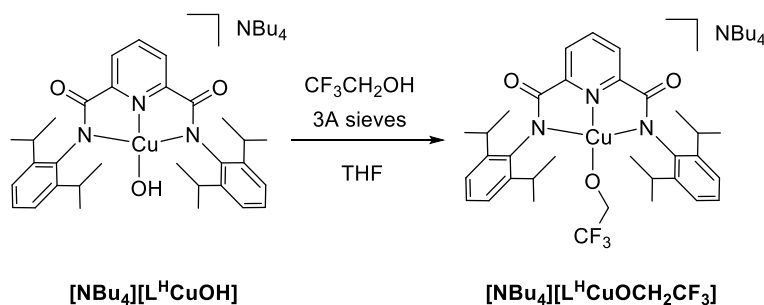

In a scintillation vial,  $[\text{NBu}_4][\text{L}^{\text{H}}\text{CuOH}]$  (105.2 mg, 0.130 mmol) was dissolved in THF (5.0 mL) followed by addition of 3 Å molecular sieves. To the blue mixture, 2,2,2-trifluoroethanol (47.5  $\mu\text{L}$ , 0.652 mmols, 5 equiv.) was added, and the now dark blue mixture was stirred for 3 h. The solution was then filtered via a syringe PTFE filter, and the solvent was removed, yielding a dark blue oil which was stirred in pentane (5 mL) overnight. The resulting navy blue powder was isolated by decantation, and dried *in vacuo* to give  $[\text{NBu}_4][\text{L}^{\text{H}}\text{CuOCH}_2\text{CF}_3]$  (106.5 mg, 92% yield). X-ray quality crystals were obtained by layering pentane on a concentrated THF solution of the complex. UV-vis (THF)  $\lambda_{\text{max}}$ , nm ( $\epsilon$ ,  $\text{M}^{-1} \text{cm}^{-1}$ ): 266 (17000), 302 (*sh*, 12900), 370 (*sh*, 2650), 566 (320), 659 (360). Anal. calcd (%) for  $\text{C}_{49}\text{H}_{75}\text{CuF}_3\text{N}_4\text{O}_3$  (888.71): C, 66.22; H, 8.51; N, 6.30. Found: C, 66.00; H, 8.22; N, 6.19.

## Synthesis of $[\text{NBu}_4][\text{L}^{\text{OMe}}\text{CuOCH}_2\text{CF}_3]$

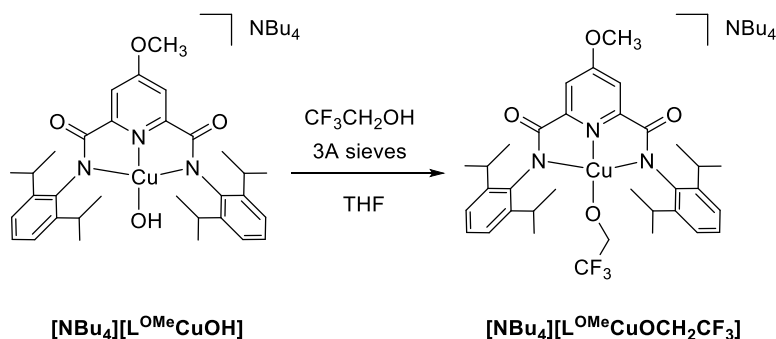

In a scintillation vial,  $[\text{NBu}_4][\text{L}^{\text{OMe}}\text{CuOH}]$  (83.6 mg, 0.100 mmol) was dissolved in THF (ca. 3 mL) followed by addition of 3 Å molecular sieves (ca. 300 mg). To the indigo mixture, excess 2,2,2-trifluoroethanol (50  $\mu\text{L}$ , 0.69 mmol) was added, and the now teal-blue mixture was stirred for 2 h. The solution was then filtered by a syringe PTFE filter, and the bulk of the product was precipitated by addition of ca. 5 mL of  $\text{Et}_2\text{O}$  and 10 mL of pentane, yielding a dark blue viscous residue and a light blue supernatant. The residue was redissolved in ca. 2 mL THF and layered with ca. 15 mL pentane, then left undisturbed overnight. The product formed blue crystal masses which were decanted and dried *in vacuo* overnight, yielding  $[\text{NBu}_4][\text{L}^{\text{OMe}}\text{CuOCH}_2\text{CF}_3]$  as a blue powder (66.4 mg, 72%). The crystals formed during isolation were not usable for x-ray characterization as even brief exposure outside of the mother liquor resulted in crazing and eventual disintegration, presumably due to loss of volatile solvents of crystallization. Instead, x-ray quality crystals were obtained by storing the initial supernatant solution at  $-30\text{ }^\circ\text{C}$  for 3 days, resulting in a structure incorporating one THF and one 2,2,2-trifluoroethanol molecule per  $[\text{NBu}_4][\text{L}^{\text{OMe}}\text{CuOCH}_2\text{CF}_3]$  moiety. UV-vis (THF)  $\lambda_{\text{max}}$ , nm ( $\epsilon$ ,  $\text{M}^{-1}\text{ cm}^{-1}$ ): 571 (346), 661 (416). Anal. calcd (%) for  $\text{C}_{50}\text{H}_{77}\text{CuF}_3\text{N}_4\text{O}_4$  (918.73): C, 65.37; H, 8.45; N, 6.10. Found: C, 65.54; H, 8.48; N, 5.99.

## II. UV-VISIBLE SPECTRA FOR CU(II) COMPLEXES

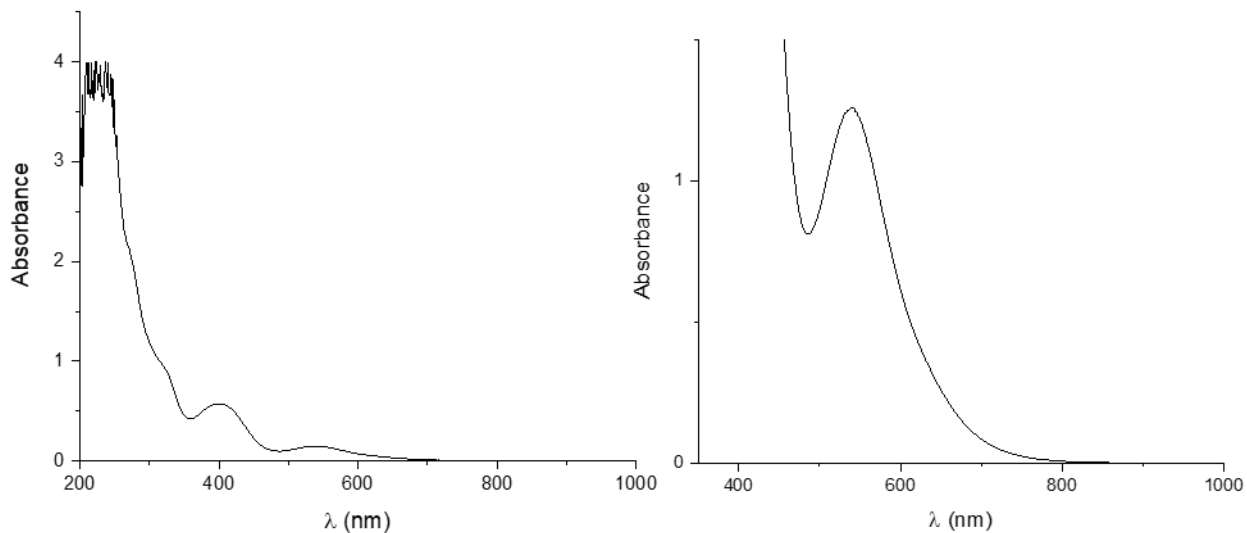

**Figure S3.** Electronic absorption spectrum of LOMeCu(CH<sub>3</sub>CN) in CH<sub>3</sub>CN at room temperature. [Cu]: 0.2 mM (left), 2 mM (right).

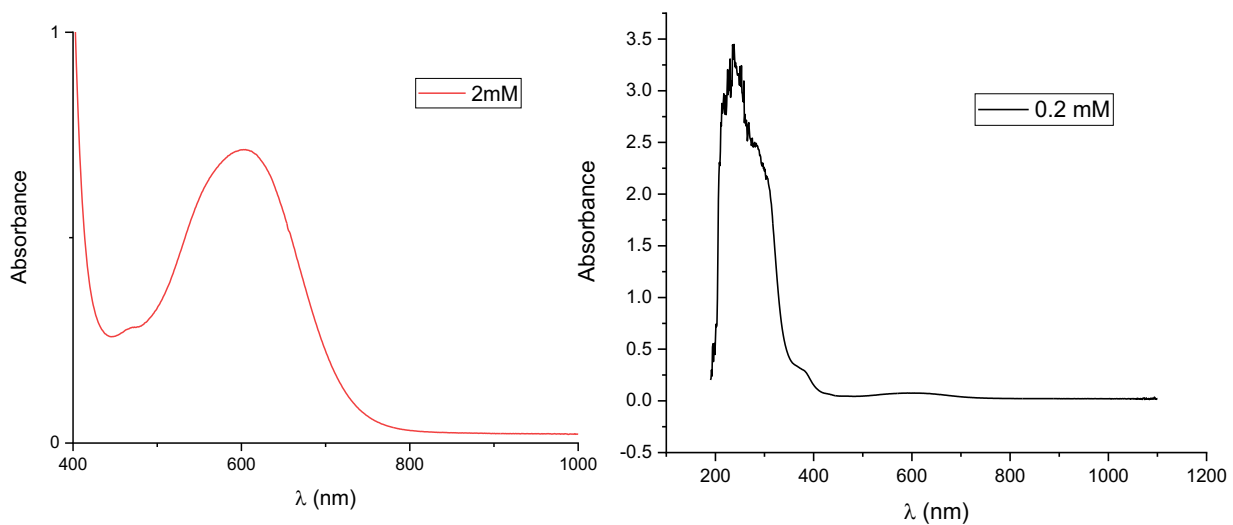

**Figure S4.** Electronic absorption spectrum of [NBu<sub>4</sub>][L<sup>OMe</sup>CuOH] in THF at -80 °C. [Cu]: 0.2 mM (left), 2 mM (right).



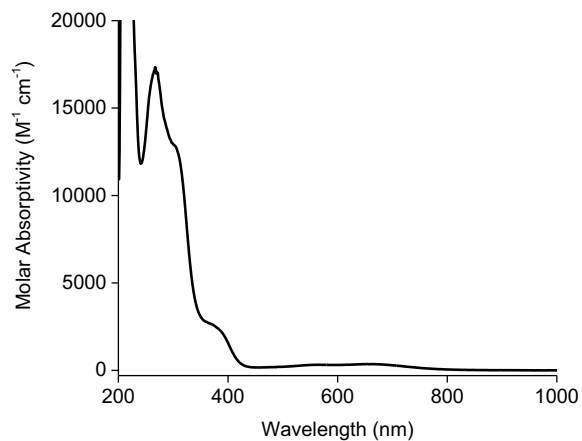

**Figure S5.** UV-vis spectrum of  $[\text{NBu}_4][\text{L}^{\text{H}}\text{CuOCH}_2\text{CF}_3]$ . Conditions:  $[\text{Cu}] = 1.3 \text{ mM}$ , THF,  $-80 \text{ }^\circ\text{C}$ .

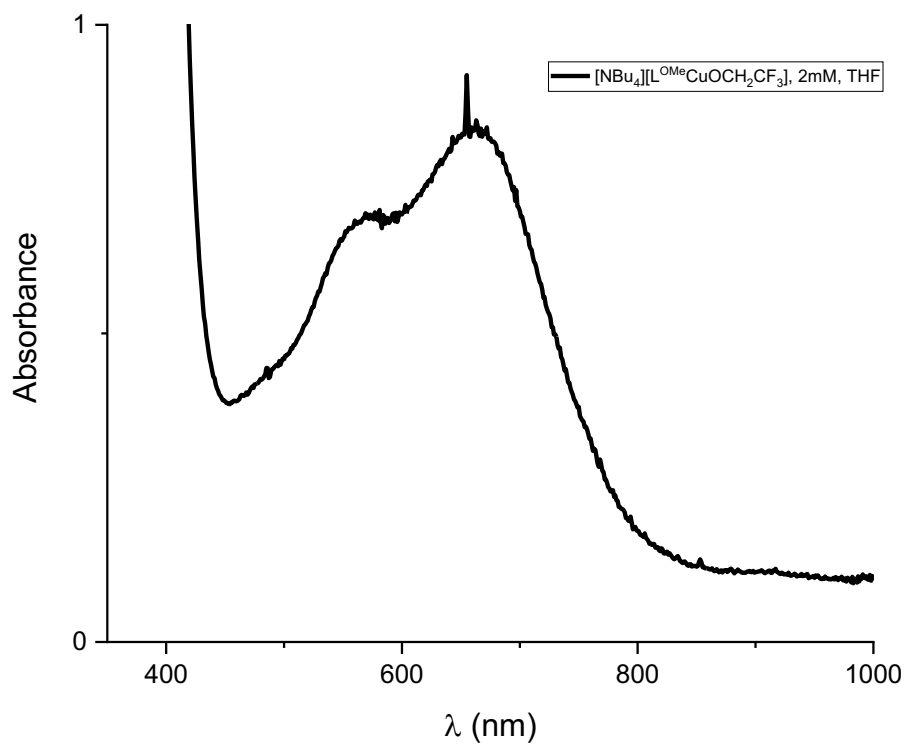

**Figure S6.** Electronic absorption spectrum of  $[\text{NBu}_4][\text{L}^{\text{OMe}}\text{CuOCH}_2\text{CF}_3]$ , 2 mM, THF, RT.

### III. EPR SPECTROSCOPY

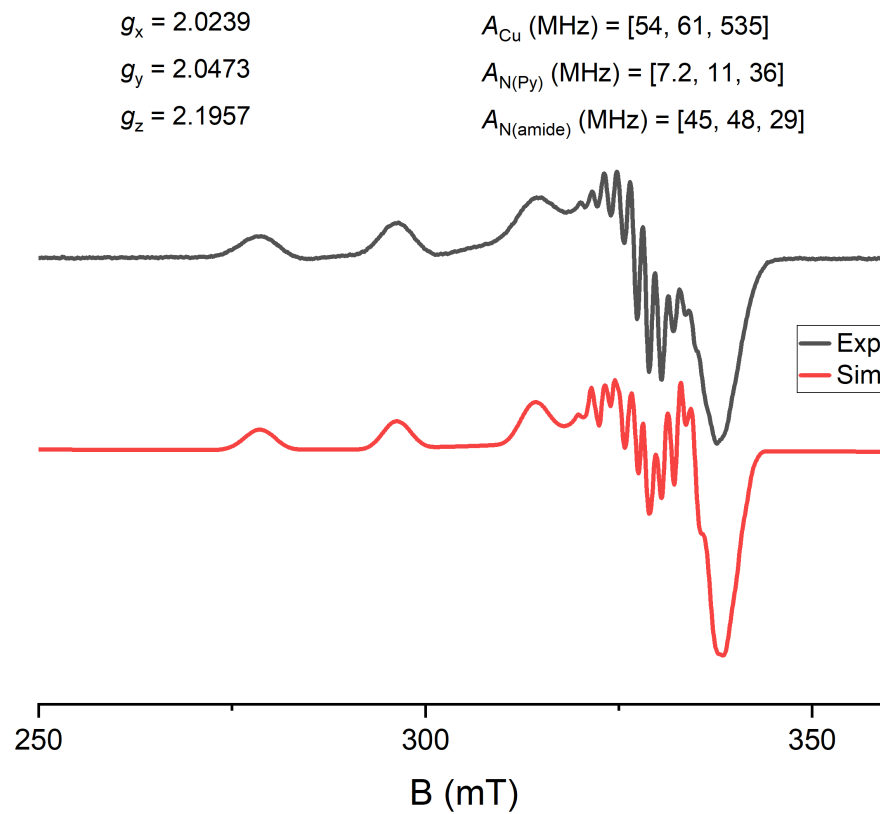

**Figure S7.** Experimental (black) and simulated (red) X-band EPR spectra of  $[\text{NBu}_4][\text{L}^{\text{OMe}}\text{CuOH}]$  (1 mM, THF, 0.0635 mW, 30K). Relevant simulated values are as shown.

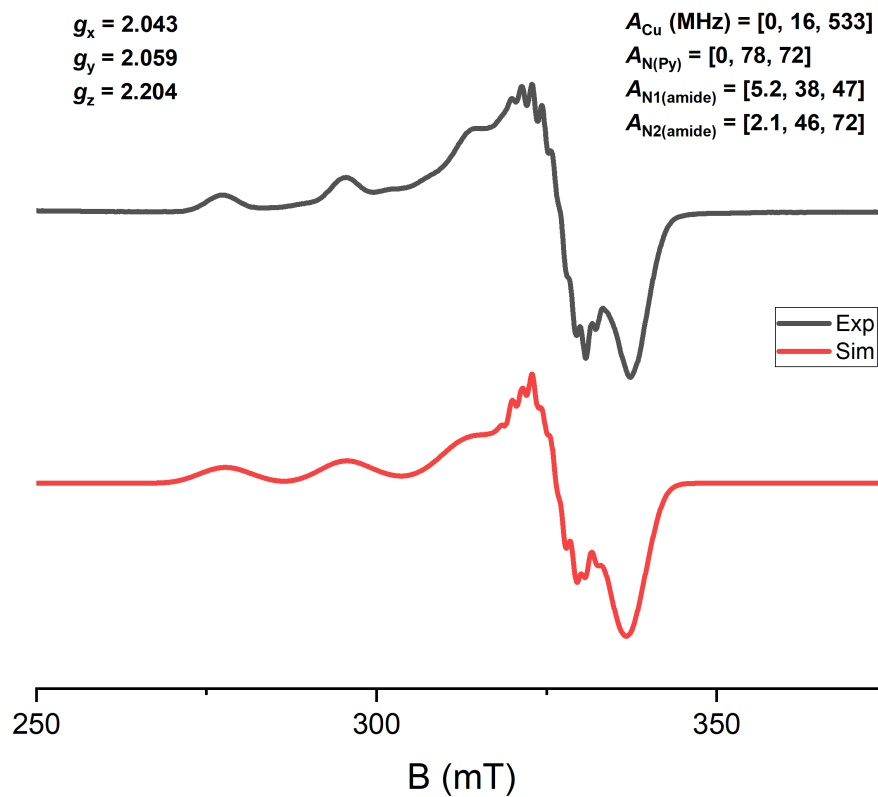

**Figure S8.** Experimental (black) and simulated (red) X-band EPR spectra of  $[\text{NBu}_4][\text{L}^{\text{H}}\text{CuOCH}_2\text{CF}_3]$  (1 mM, THF, 0.0635 mW, 30K). Relevant simulation parameters are shown.

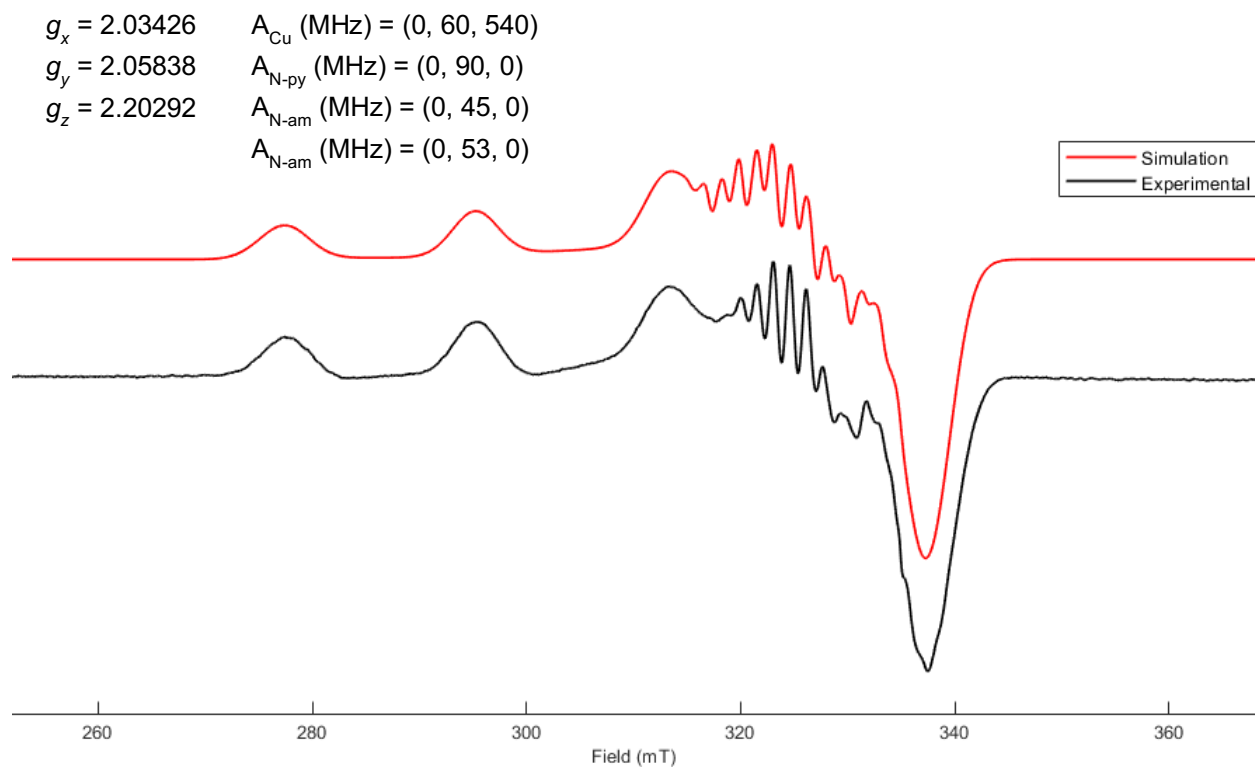

**Figure S9.** X-band EPR spectrum of  $[\text{NBu}_4][\text{L}^{\text{OMe}}\text{CuOCH}_2\text{CF}_3]$  (1 mM, THF, 0.0635 mW, 30K), black, and simulation, red. Relevant simulated values are as shown.

#### IV. CYCLIC VOLTAMMETRY

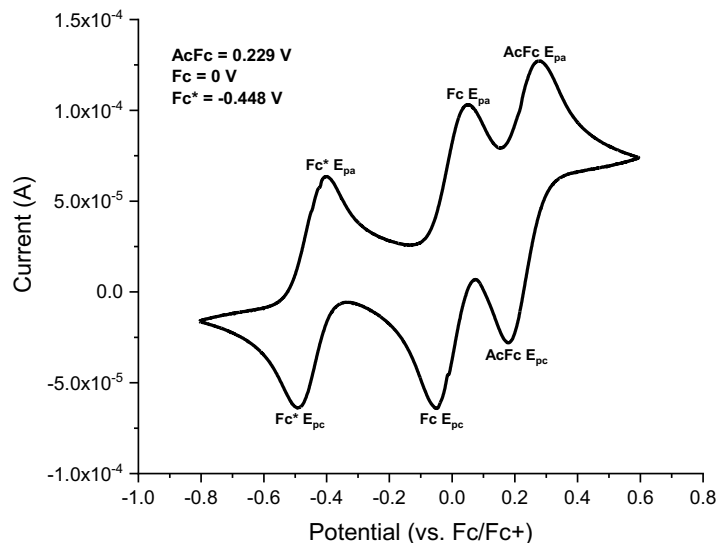

**Figure S10.** Cyclic voltammogram of decamethylferrocene (Fc\*), ferrocene (Fc), and acetylferrocene (AcFc) in THF, 0.2 M NBu<sub>4</sub>PF<sub>6</sub>, 50 mV s<sup>-1</sup>. All electrochemical measurements are internally referenced using the E<sub>1/2</sub> values listed (top left of plot).

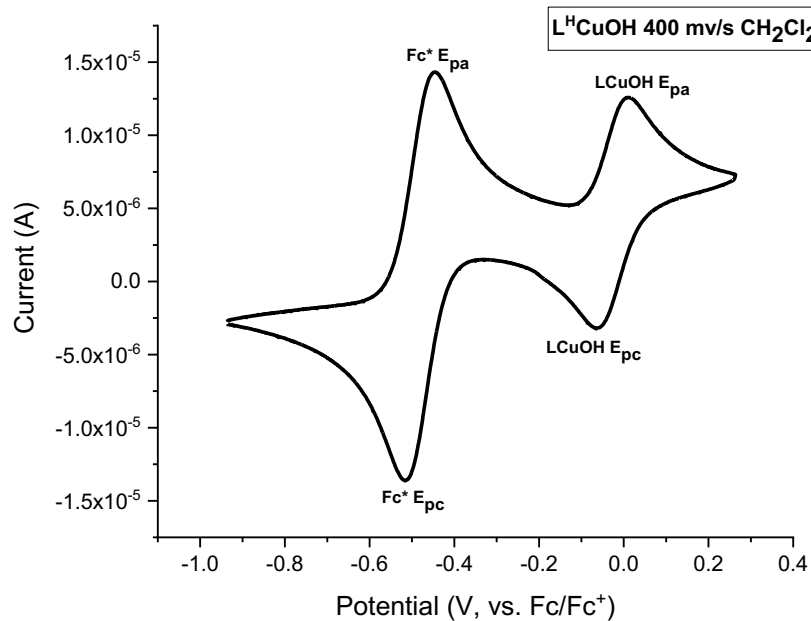

**Figure S11.** Cyclic voltammogram of [NBu<sub>4</sub>][LCuOH] (1 mM, 0.2 M NBu<sub>4</sub>PF<sub>6</sub>, 400 mV/s) in CH<sub>2</sub>Cl<sub>2</sub>, with the presence of Fc\*. Peaks assigned to compound and internal standard are labeled.

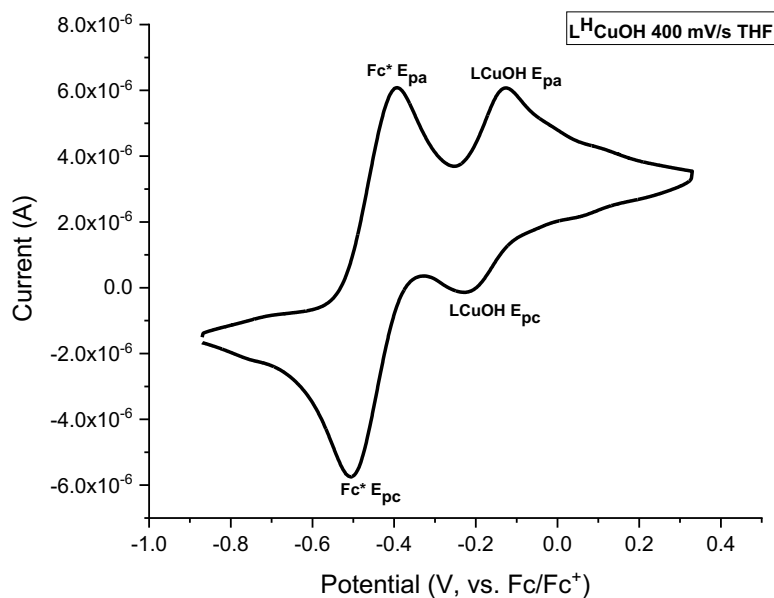

**Figure S12.** Cyclic voltammogram of  $[\text{NBu}_4][\text{LCuOH}]$  (1 mM, 0.2M  $\text{NBu}_4\text{PF}_6$ , 400 mV/s) in THF, with the presence of  $\text{Fc}^*$ . Peaks assigned to compound and internal standard are labeled.

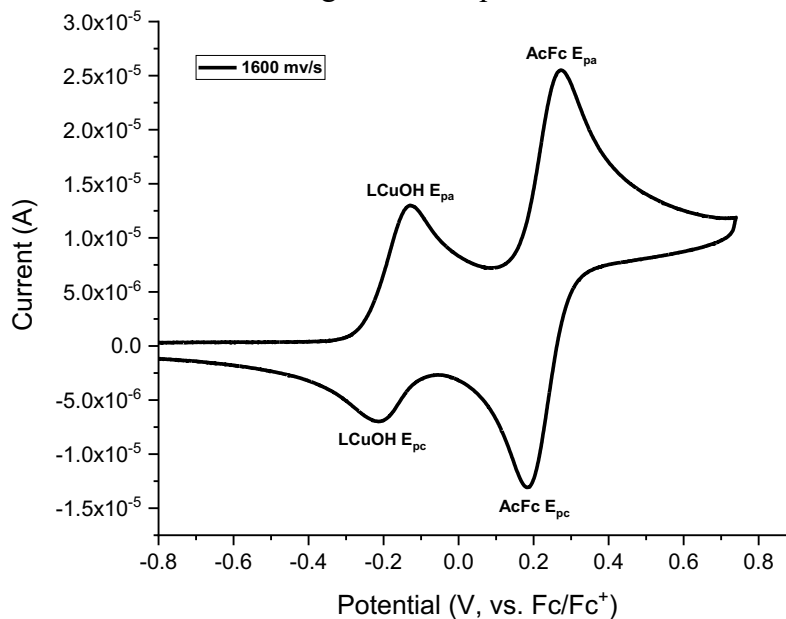

**Figure S13.** Representative internally-referenced voltammogram of  $[\text{NBu}_4][\text{L}^{\text{H}}\text{CuOH}]$  (1 mM, 1600 mV/s, vs.  $\text{Fc}^{0/+}$ ) in THF; peaks assigned to AcFc and complex are labeled.

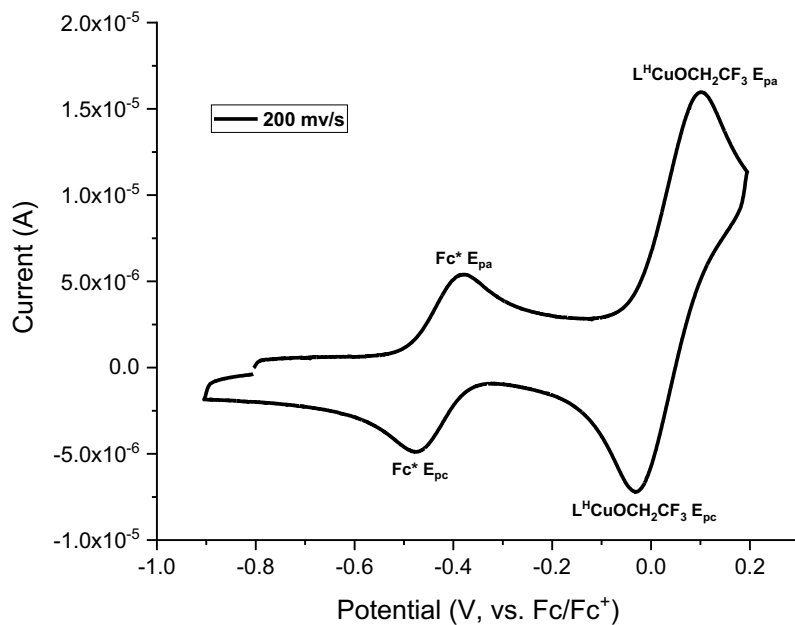

**Figure S14.** Representative internally-referenced voltammogram of  $[\text{NBu}_4][\text{L}^{\text{H}}\text{CuOCH}_2\text{CF}_3]$  (1 mM, 200 mV/s, vs.  $\text{Fc}^{0/+}$ ) in THF; peaks assigned to  $\text{Fc}^*$  and complex are labeled.

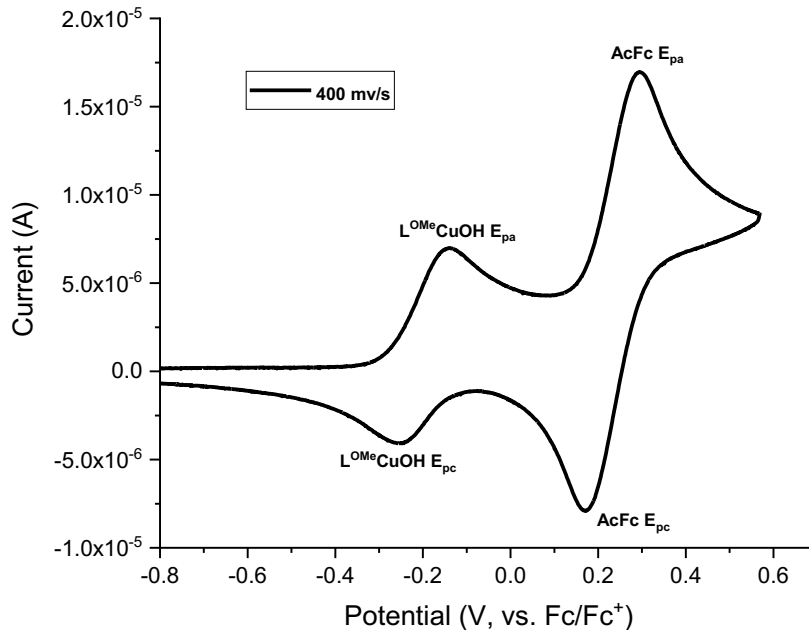

**Figure S15.** Representative internally-referenced voltammogram of  $[\text{NBu}_4][\text{L}^{\text{OMe}}\text{CuOH}]$  (1 mM, 400 mV/s, vs.  $\text{Fc}^{0/+}$ ) in THF; peaks assigned to AcFc and complex are labeled.

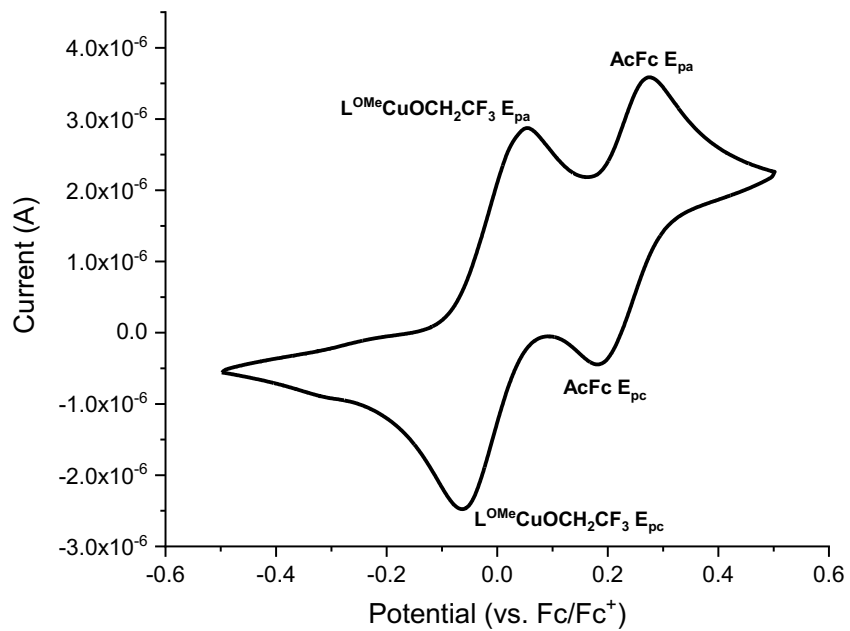

**Figure S16.** Representative internally-referenced voltammogram of  $[\text{NBu}_4][\text{L}^{\text{OMe}}\text{CuOCH}_2\text{CF}_3]$  (1 mM, 200 mV/s, vs.  $\text{Fc}^{0/+}$ ) in THF; peaks assigned to AcFc and complex are labeled.



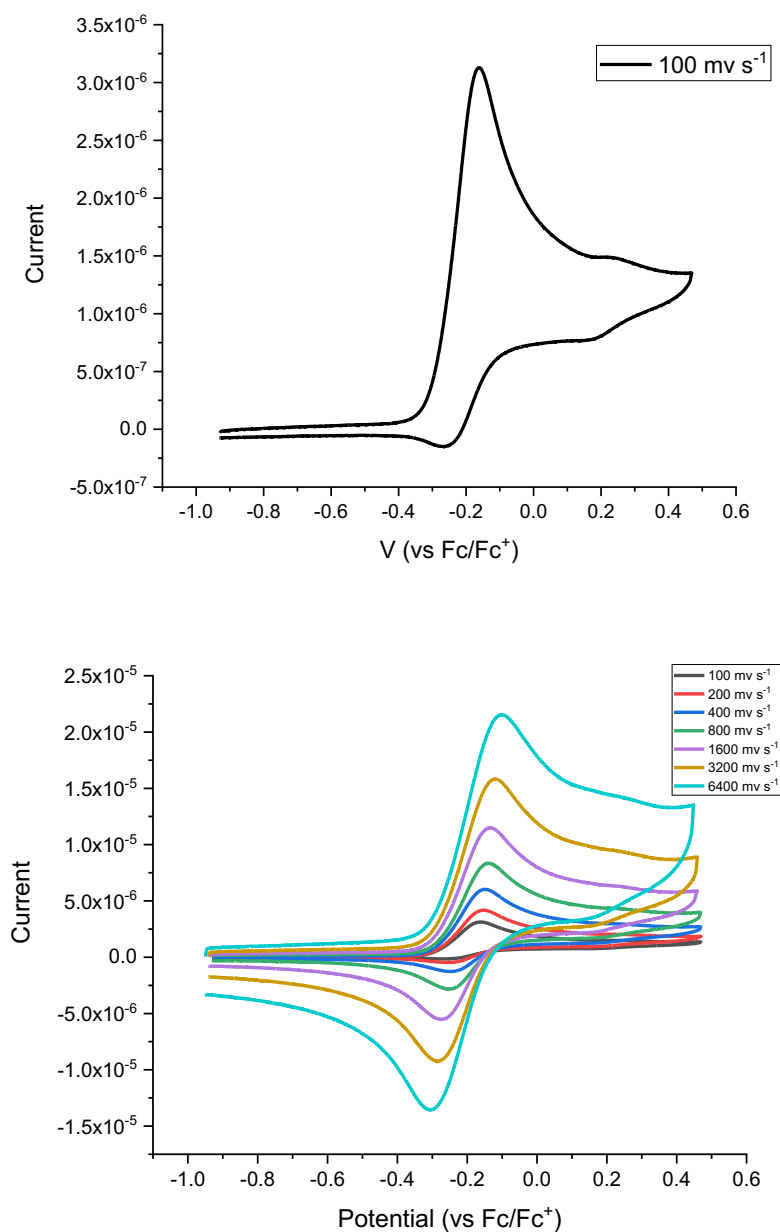

**Figure S17.** Anodic cyclic voltammetry of  $[\text{NBu}_4][\text{L}^{\text{OMe}}\text{CuOH}]$  (1 mM) in THF in the presence of  $\text{NBu}_4\text{PF}_6$  (0.2 M) as electrolyte. TOP: Irreversible anodic voltammogram of  $[\text{NBu}_4][\text{L}^{\text{OMe}}\text{CuOH}]$  at a scan rate of  $100 \text{ mV s}^{-1}$  ( $E_{\text{pa}} = -161 \text{ mV}$ ,  $i_{\text{pa}} = 3.1 \mu\text{A}$ ). BOTTOM: Anodic scans with variable scan rates from 100-6400  $\text{mV s}^{-1}$  ( $E_{1/2} = -202 \text{ mV}$ , averaged over scan rates from 400-6400  $\text{mV s}^{-1}$ ).

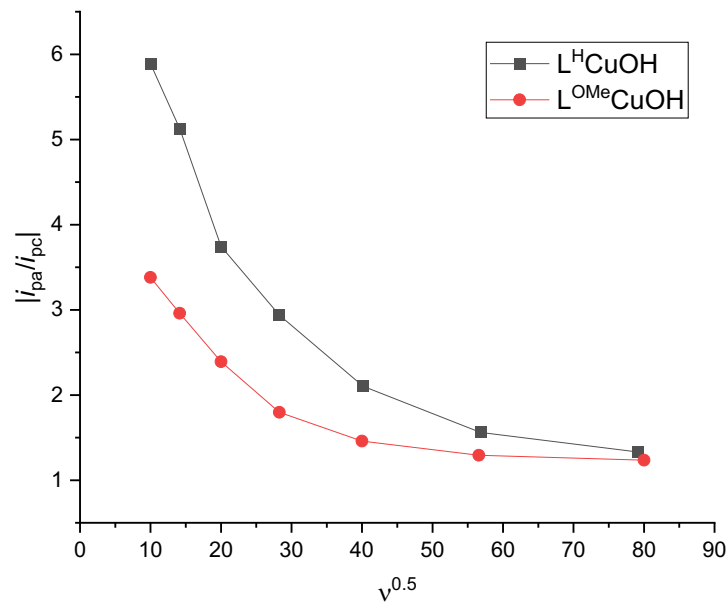

**Figure S18.** Reversibility comparison of  $[CuOH]^{2+}/[CuOH]^+$  redox couples of  $[NBu_4][L^H CuOH]$  vs  $[NBu_4][L^{OMe} CuOH]$ . Ratio of current intensities of anodic wave and return wave ( $i_{pa}/i_{pc}$ ) are plotted as a function of the square root of the scan rate ( $v$ ).

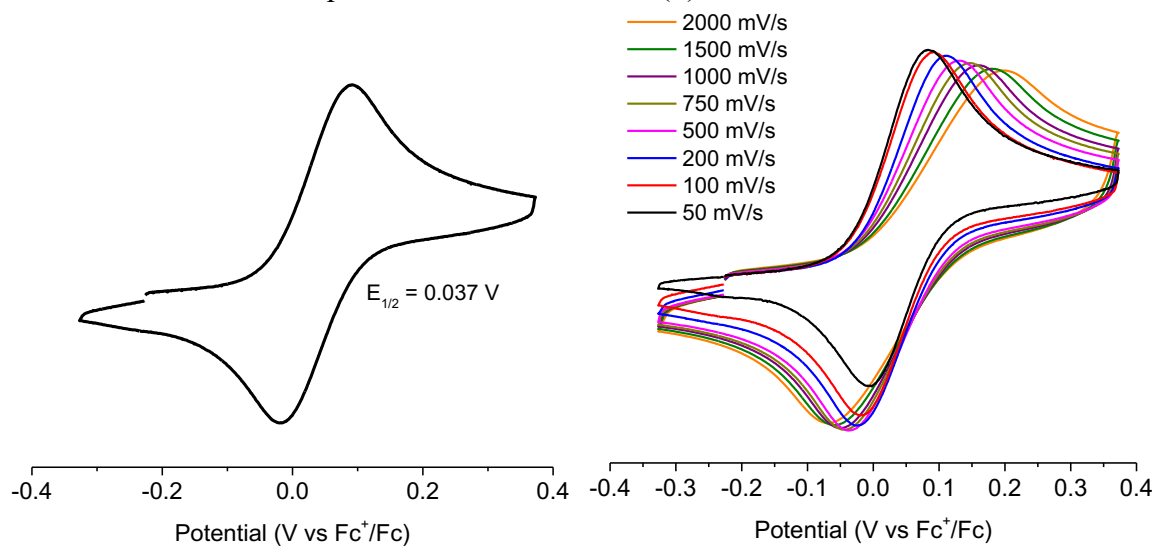

**Figure S19.** Cyclic voltammograms of  $[NBu_4][L^H CuOCH_2CF_3]$  at a scan rate of 100 mV/s (left) and scan rate normalized traces at varying scan rates (right). Conditions:  $[Cu] = 1$  mM, THF,  $[NBu_4PF_6] = 0.2$  M.

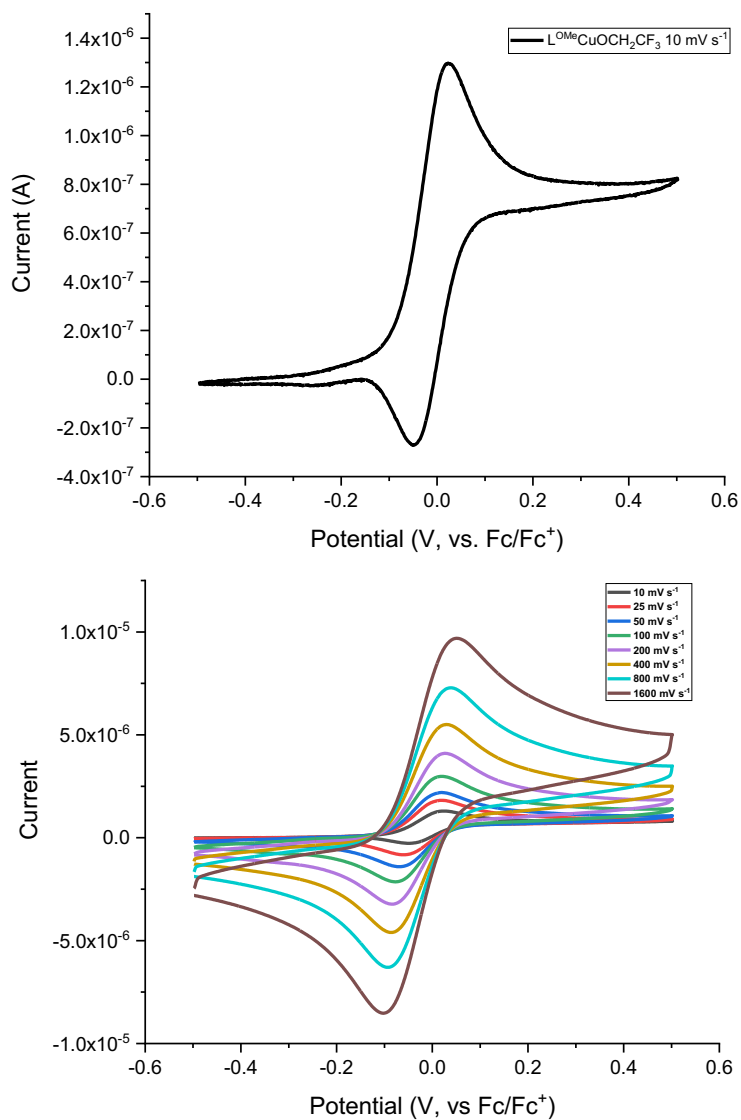

**Figure S20.** Cyclic voltammograms of [NBu<sub>4</sub>][L<sup>OMe</sup>CuOCH<sub>2</sub>CF<sub>3</sub>] at a scan rate of 10 mV s<sup>-1</sup> (top) and traces at varying scan rates (bottom). Conditions: [Cu] = 1 mM, THF, [NBu<sub>4</sub>PF<sub>6</sub>] = 0.2 M (E<sub>1/2</sub> = -24 mV, averaged over all experimental scan rates).

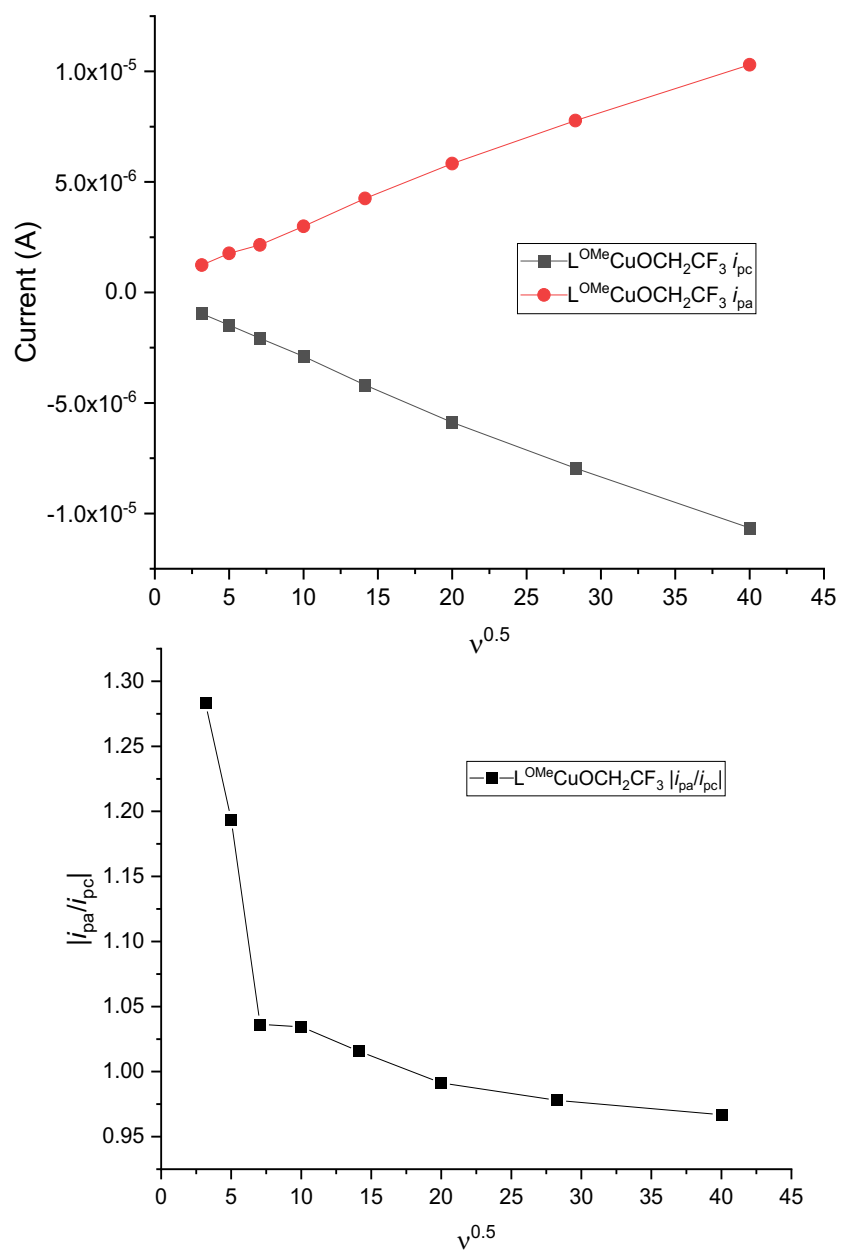

**Figure S21.** Reversibility of  $[CuOR]^{2+}/[CuOR]^+$  redox couple of  $[NBu_4][L^{OMe}CuOCH_2CF_3]$ . TOP: Current response as a function of the square root of the scan rate; BOTTOM: Ratio of current intensities of anodic wave and return wave ( $|i_{pa}/i_{pc}|$ ) are plotted as a function of the square root of the scan rate.

## Reduction potential of $L^H CuOH$

We note that the  $E_{1/2}$  value we presently measure for  $[NBu_4][L^H CuOH]$  in THF (-0.167 V vs  $Fc^{0/+}$ ) conflicts with a previously reported value (-0.074 V) from our group.<sup>9</sup> However, measurement in  $CH_2Cl_2$  yielded a result in agreement with our previously reported value in that solvent.<sup>10</sup> We believe that our current measurement reflects the true potential of this redox couple in THF, and postulate that this discrepancy may have arisen from the practice of external referencing using the Ag wire pseudo-reference electrode in the previous measurement of this value in THF. External referencing can introduce calibration errors as any changes to the Ag wire surface occurring between measurement of the analyte and reference will offset the reported value. Our current and other previous works report  $[NBu_4][L^H CuOH]$  potentials internally referenced to ferrocene (Fc) decamethylferrocene (Fc\*) or acetylferrocene (AcFc); representative internally-referenced voltammograms are provided for all standards,  $[NBu_4][L^H CuOH]$ , and all novel complexes in this report.

## V. CHEMICAL FORMATION OF $L^YCuOR$ SPECIES

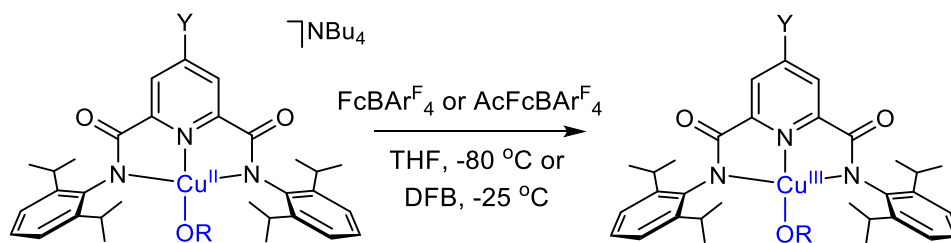

### General Procedures

**Generation of  $L^YCuOR$ .** Under argon, a cuvette with 1.8 mL of neat solvent (THF or 1,2-fluotobenzene, DFB) was placed inside a Unisoku low temperature cell holder pre-cooled to the specified temperature ( $-80\text{ }^\circ\text{C}$  in THF or  $-25\text{ }^\circ\text{C}$  in DFB) and allowed to thermally equilibrate at least 7 min; a blank spectrum was then recorded. A 0.1 mL aliquot of 2.0 mM  $[NBu_4][L^YCuOR]$  in the respective solvent was injected to the sample. To this stirred solution, 0.1 mL of 2.0 mM oxidant solution ( $FcBARF_4$  for  $OR = OH$ ,  $AcFcBARF_4$  for  $OR = OCH_2CF_3$ ) was added to the to generate the corresponding  $L^YCuOR$  species *in situ*, and a spectrum of the oxidized species was collected approximately 5 seconds after injection of the oxidant. The stoichiometry of the oxidation was established using incremental titration carried out in a similar manner, using a 0.4 mM solution of the corresponding oxidant added 0.1 mL at a time into a solution containing a total of  $0.2\text{ }\mu\text{mol}$  of  $[NBu_4][L^YCuOR]$  in 1.5 mL (see figures below). In all cases, a 1:1 reaction stoichiometry was observed.

### $L^{OMe}CuOH$

Deep purple solution forms. UV-Vis:  $\lambda_{max}$ , nm ( $\epsilon$ ,  $M^{-1}\text{ cm}^{-1}$ ): 542 (13600, THF,  $-80\text{ }^\circ\text{C}$ ); 554 (11500, DFB,  $-25\text{ }^\circ\text{C}$ ).

### **L<sup>H</sup>CuOCH<sub>2</sub>CF<sub>3</sub>**

Deep blue solution forms. UV-vis (THF, -80 °C)  $\lambda_{\text{max}}$ , nm ( $\epsilon$ , M<sup>-1</sup> cm<sup>-1</sup>): 420 (*sh*, 4200) 629 (12400), 715 (10900). UV-vis (DFB, -25 °C)  $\lambda_{\text{max}}$ , nm ( $\epsilon$ , M<sup>-1</sup> cm<sup>-1</sup>): 643 (11800), 756 (11300).

### **L<sup>OMe</sup>CuOCH<sub>2</sub>CF<sub>3</sub>**

Deep blue solution forms. UV-vis (DFB, -25 °C)  $\lambda_{\text{max}}$ , nm ( $\epsilon$ , M<sup>-1</sup> cm<sup>-1</sup>): 461 (*sh*, 5900), 625 (10980), 734 (*sh*,9800). UV-vis (THF, -80°C)  $\lambda_{\text{max}}$ , nm ( $\epsilon$ , M<sup>-1</sup> cm<sup>-1</sup>): 461 (*sh*, 5900), 608 (12050), 730 (*sh*, 9400).

### **Chemical Reversibility Experiments**

In a glovebox, a cuvette containing neat THF was sealed with a rubber septum, removed from the glovebox, and placed in a Unisoku low temperature cell holder pre-cooled to the specified temperature, and put under argon. Once the sample had thermally equilibrated (at least 7 min), a blank spectrum was taken. A 0.1 mL aliquot of 2.0 mM [NBu<sub>4</sub>][L<sup>Y</sup>CuOR] was injected, resulting in the concentration indicated below, and an initial spectrum taken. To this stirred solution, repeated sequential additions of 0.1 mL of 2.0 mM oxidant (FcBAr<sup>F</sup><sub>4</sub> for -OR = -OH, AcFcBAr<sup>F</sup><sub>4</sub> for -OR = -OCH<sub>2</sub>CF<sub>3</sub>) and reductant (FeCp\*<sub>2</sub>) were performed. Reaction progress was monitored by UV-Vis spectroscopy (see below).

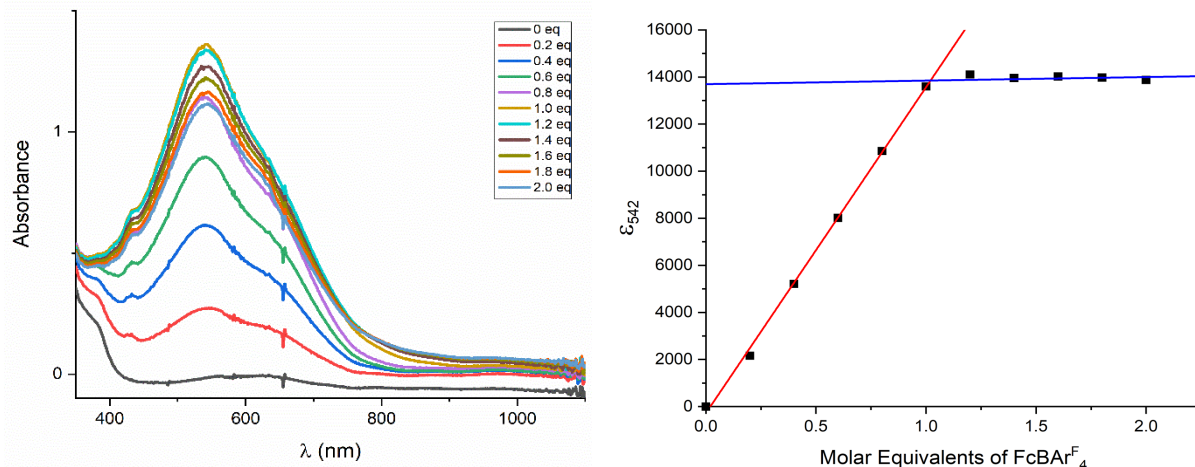

**Figure S22.** Electronic spectra of  $L^{OMe}CuOH$  generated in situ from  $[NBu_4][L^{OMe}CuOH]$ , THF,  $-80\text{ }^\circ C$ . LEFT: Titration of  $[NBu_4][L^{OMe}CuOH]$  with  $FcBAR^F_4$  (0-2 eq); RIGHT: Plot of  $\epsilon$  ( $\lambda_{max} = 542\text{ nm}$ ) with respect to molar eq. of  $FcBAR^F_4$ .

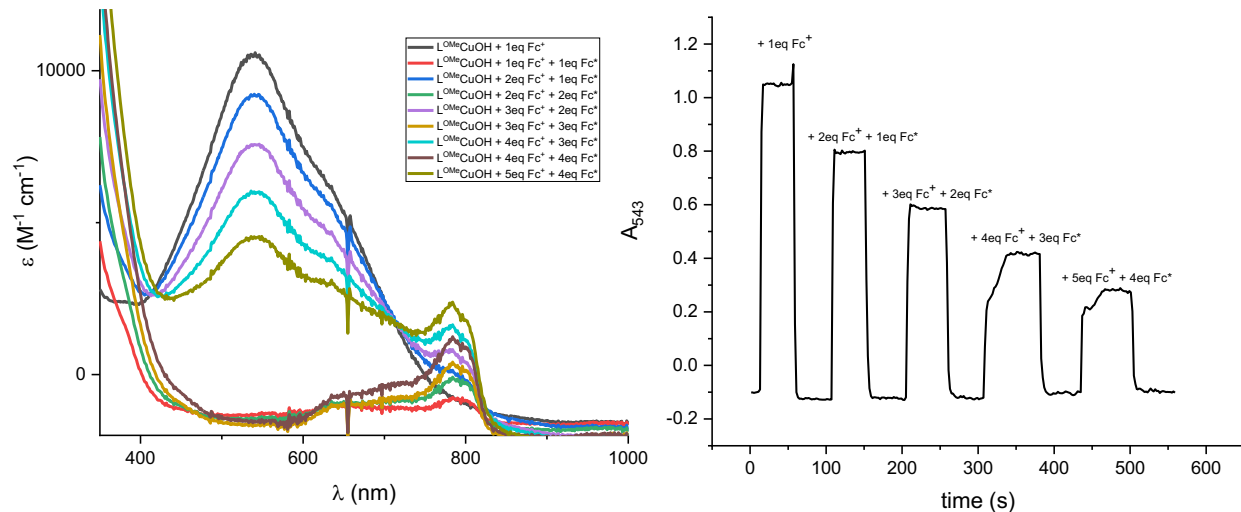

**Figure S23.** Sequential treatment of  $[NBu_4][L^{OMe}CuOH]$  with  $FcBAR^F_4$  in THF at  $-80\text{ }^\circ C$  (generating  $L^{OMe}CuOH$ ) and  $Fe(Cp^*)_2$  (regenerating  $[NBu_4][L^{OMe}CuOH]$  and  $[Fc^*]^+$ );  $[Cu]_0 = 0.13\text{ mM}$ . LEFT: Full spectra after additions as noted; RIGHT: Kinetics trace at  $\lambda_{max} = 543\text{ nm}$ ; peak plateaus correspond to  $L^{OMe}CuOH$ , troughs correspond to  $[NBu_4][L^{OMe}CuOH]$  and  $[Fc^*]^+$ .



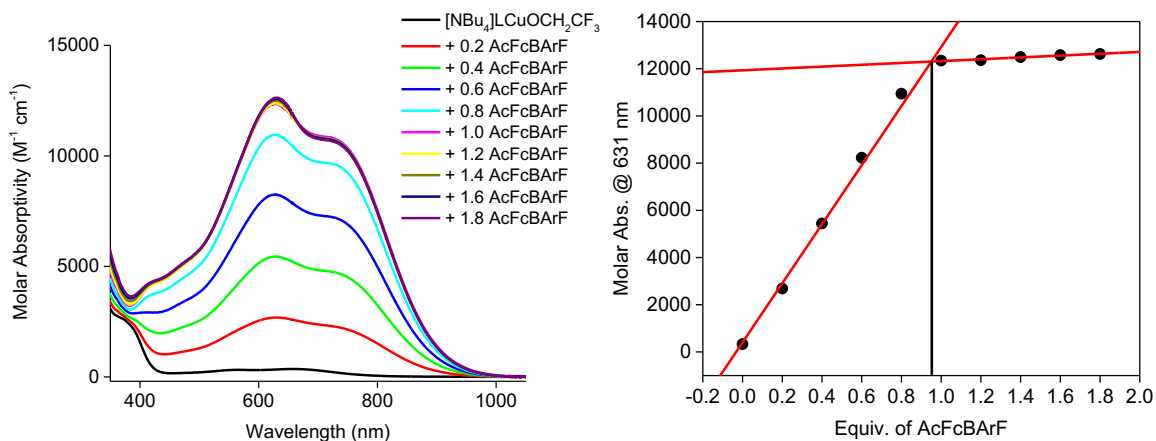

**Figure S24.** UV-vis spectra stack of the addition of  $[AcFc][BAR^F_4]$  (0.2 equiv/aliquot) to  $[NBu_4][L^H CuOCH_2CF_3]$  (left) and the corresponding molar absorptivity values at  $\lambda_{max}$  631 nm after each aliquot addition (right). Conditions  $[Cu]_0 = 1.3$  mM, THF,  $-80$  °C.

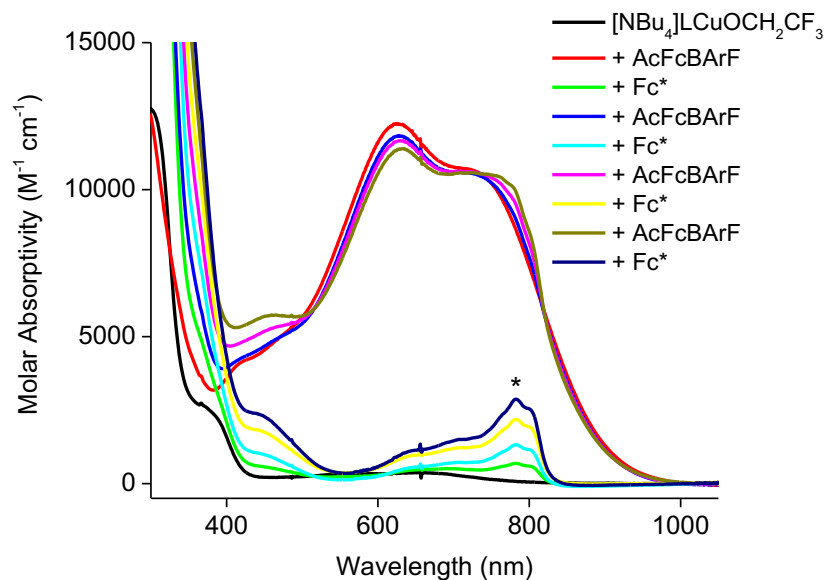

**Figure S25.** UV-vis spectra of the subsequent additions of  $[AcFc][BAR^F_4]$  and  $Fc^*$  to  $[NBu_4][LCuOCH_2CF_3]$ . Conditions  $[Cu]_0 = 0.11$  mM, THF,  $-80$  °C. (\* denotes decamethylferrocenium signal).

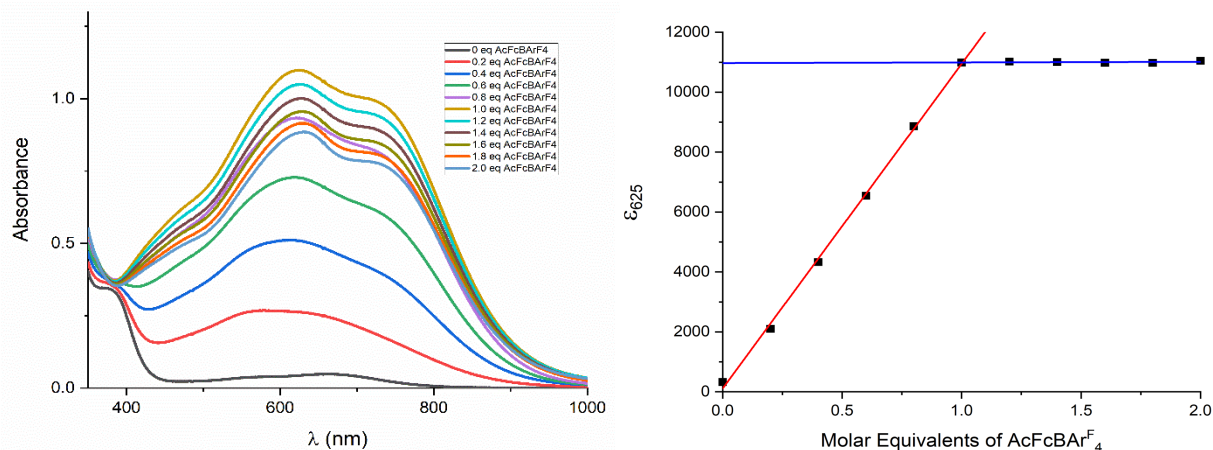

**Figure S26.** Electronic spectra of  $L^{\text{OMe}}\text{CuOCH}_2\text{CF}_3$  generated *in situ* from  $\text{NBu}_4[\text{L}^{\text{OMe}}\text{CuOCH}_2\text{CF}_3]$ , DFB,  $-25^\circ\text{C}$ . LEFT: Titration of  $[\text{NBu}_4][\text{L}^{\text{OMe}}\text{CuOCH}_2\text{CF}_3]$  with  $\text{AcFcBAR}^{\text{F}}_4$  (0-2eq); RIGHT: Plot of  $\epsilon$  ( $\lambda_{\text{max}} = 542 \text{ nm}$ ) with respect to molar eq. of  $\text{AcFcBAR}^{\text{F}}_4$ .

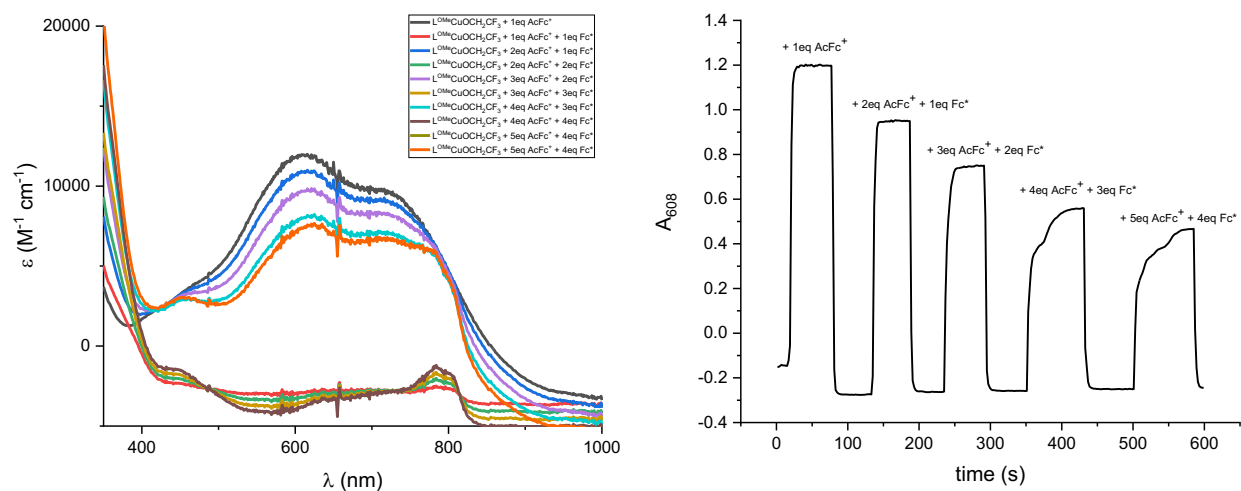

**Figure S27.** Sequential treatment of  $[\text{NBu}_4][\text{L}^{\text{OMe}}\text{CuOCH}_2\text{CF}_3]$  with  $\text{AcFcBAR}^{\text{F}}_4$  in THF at  $-80^\circ\text{C}$ . (generating  $L^{\text{OMe}}\text{CuOCH}_2\text{CF}_3$ ) and  $\text{Fe}(\text{Cp}^*)_2$  (regenerating  $[\text{NBu}_4][\text{L}^{\text{OMe}}\text{CuOCH}_2\text{CF}_3]$  and  $[\text{Fc}^*]^+$ ;  $[\text{Cu}]_0 = 0.13 \text{ mM}$ ). LEFT: Full spectra after additions as noted; RIGHT: Kinetics trace at  $\lambda_{\text{max}} = 604 \text{ nm}$ ; peak plateaus correspond to  $L^{\text{OMe}}\text{CuOCH}_2\text{CF}_3$ , troughs correspond to  $[\text{NBu}_4][\text{L}^{\text{OMe}}\text{CuOCH}_2\text{CF}_3]$  and  $[\text{Fc}^*]^+$ .

## VI. NMR SPECTROSCOPY OF $L^YCuOR$

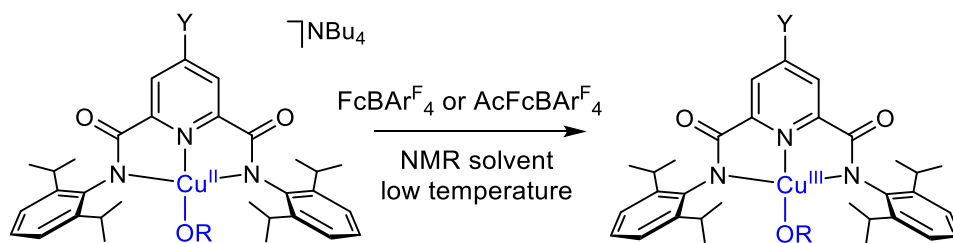

### General Procedure

A solution of  $[NBu_4][L^YCuOR]$  ( $Y = -H, -OMe$ ;  $R = -H, -OCH_2CF_3$ ) in the specified NMR solvent was placed in a J Young tube outfitted with a rubber septum and cooled as indicated. To this cooled solution, under Ar flow, a solution of oxidant ( $FcBARF_4$  or  $AcFcBARF_4$ ) was slowly added via syringe to the tube and allowed to layer. The sample was allowed to thermally equilibrate (~2 min) and then rapidly mixed; the septum was then removed and immediately replaced with a Teflon pin under Ar flow. The tube was then quickly placed inside a pre-cooled spectrometer and the spectrum was acquired. See specific details for each experiment below.

### $^1H$ NMR Analysis of $L^YCuOH$ ( $Y = -H, -OMe$ )

Solutions of  $[NBu_4][L^YCuOH]$  (4.0 mg,  $Y = H$ ; 4.2 mg,  $Y = OMe$ ), in  $DCB-d_4$  (0.5 mL, dried over  $3\text{\AA}$  sieves),  $FcBARF_4$  (1.0 mL, 5 mM, in  $DCB-d_4$ ) were prepared and handled as described in the General Procedure using a saturated NaCl-ice cooling bath ( $-20\text{ }^\circ\text{C}$ ) and a spectrometer pre-cooled to  $-15\text{ }^\circ\text{C}$  (Figure S28).  $^1H$  NMR ( $Y = OMe$ , 500 MHz,  $DCB-d_4$ ,  $-15\text{ }^\circ\text{C}$ ):  $\delta$  (ppm) 1.34 (24H,  $4\times CH_3, -iPr$ ), 3.42 (3H,  $p-OCH_3$ ), 3.70 (4H,  $iPr -CH$ ), 4.22 (1H,  $-OH$ ), 6.88 (2H, aryl), 7.1 (4H, aryl), 7.29 (2H, aryl). For  $Y=-OMe$ , after the initial acquisition, the sample removed from the spectrometer and exposed to room temperature for ca. 1 minute then replaced in the instrument and remeasured; the recorded spectrum suffered from a loss in resolution and showed spectral quality comparable to that obtained for  $L^H CuOH$  (Figure S29).

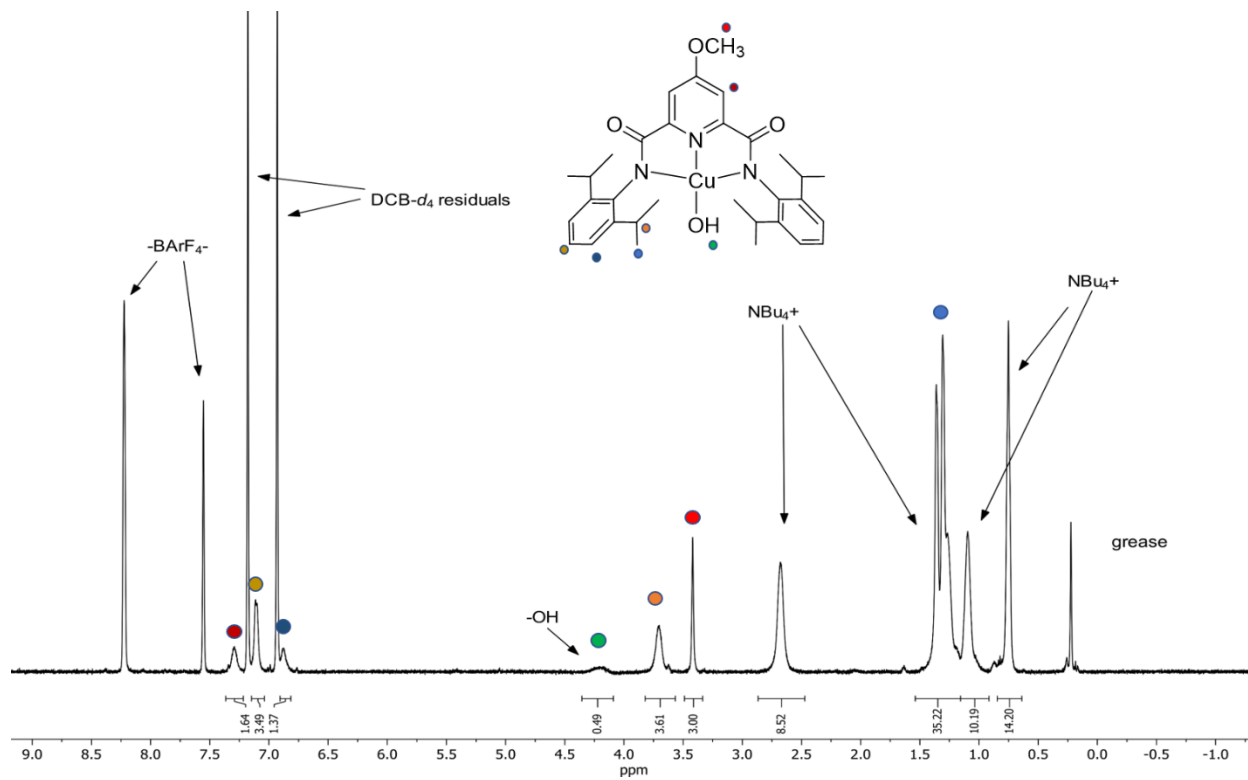

**Figure S28.**  $^1\text{H}$  NMR spectrum of  $\text{L}^{\text{OMe}}\text{CuOH}$  at  $-15\text{ }^\circ\text{C}$ . Resonances corresponding to solvent residuals and  $\text{NBu}_4\text{BArF}_4$  are indicated.

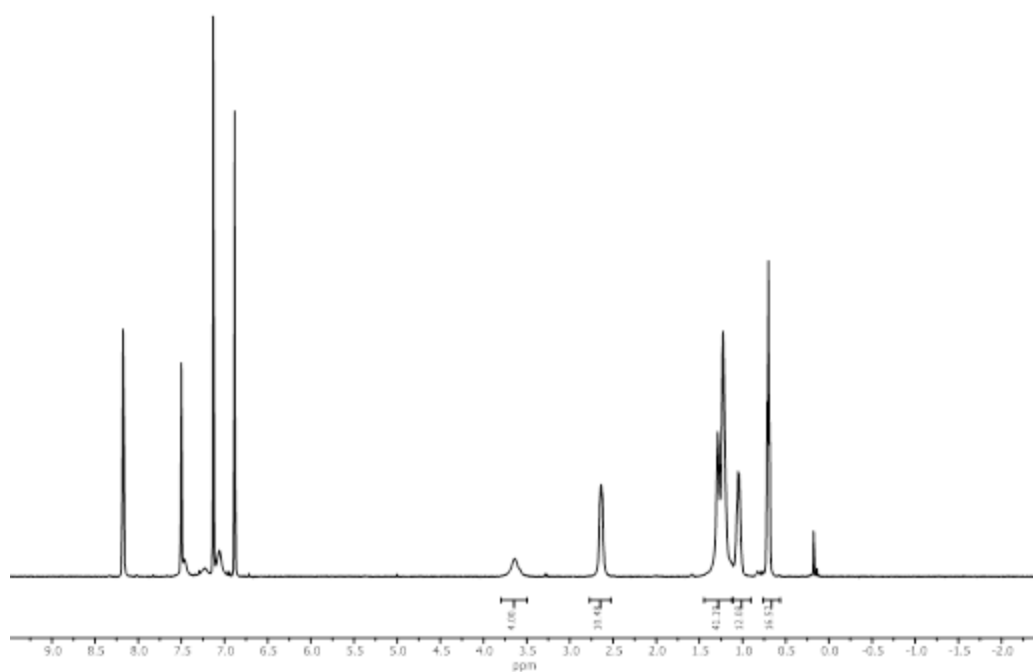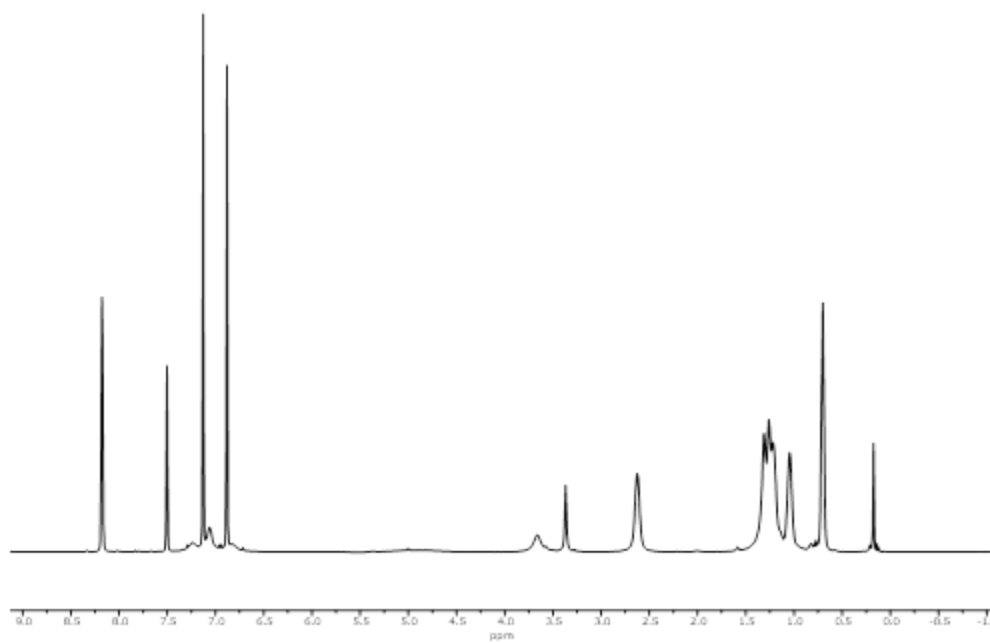

**Figure S29.** TOP: <sup>1</sup>H NMR spectrum of L<sup>H</sup>CuOH immediately after generation; BOTTOM: <sup>1</sup>H NMR spectrum of L<sup>OMe</sup>CuOH after exposure to room temperature.

## $^1\text{H}$ NMR Analysis of $\text{L}^{\text{H}}\text{CuOCH}_2\text{CF}_3$

Following the General Procedure, a solution of  $[\text{NBu}_4][\text{L}^{\text{H}}\text{CuOCH}_2\text{CF}_3]$  (4.5 mg, 5.1 mmol) in  $\text{THF-}d_8$  (0.4 mL) was treated with  $[\text{AcFc}][\text{BAR}^{\text{F}}_4]$  (5.5 mg in 0.4 mL  $\text{THF-}d_8$ ) in an acetone/dry-ice bath, then quickly added to a precooled NMR spectrometer ( $-80\text{ }^\circ\text{C}$ ) for acquisition.  $^1\text{H}$  NMR (300 MHz,  $\text{THF-}d_8$ )  $\delta$  (ppm) 1.10 (d,  $J_{\text{HH}} = 5.6$  Hz, 12H,  $-\text{CH}_3$ ), 1.22 (d,  $J_{\text{HH}} = 6.0$  Hz, 12H,  $-\text{CH}_3$ ), 2.20 (q,  $J_{\text{HF}} = 9.1$  Hz, 2H,  $-\text{CH}_2-\text{CF}_3$ ), 7.13 (d,  $J_{\text{HH}} = 7.6$  Hz, 4H, Ar-H), 7.38 (t,  $J = 7.7$  Hz, 2H, Ar-H), 8.15 (br, 2H, Py-H), 8.58 (br, 1H, Py-H). The isopropyl methylene C-H signal was overlapped by THF residual signal. The  $[\text{NBu}_4][\text{BAR}^{\text{F}}_4]$  salt and AcFc signals were identified from independent NMR samples.

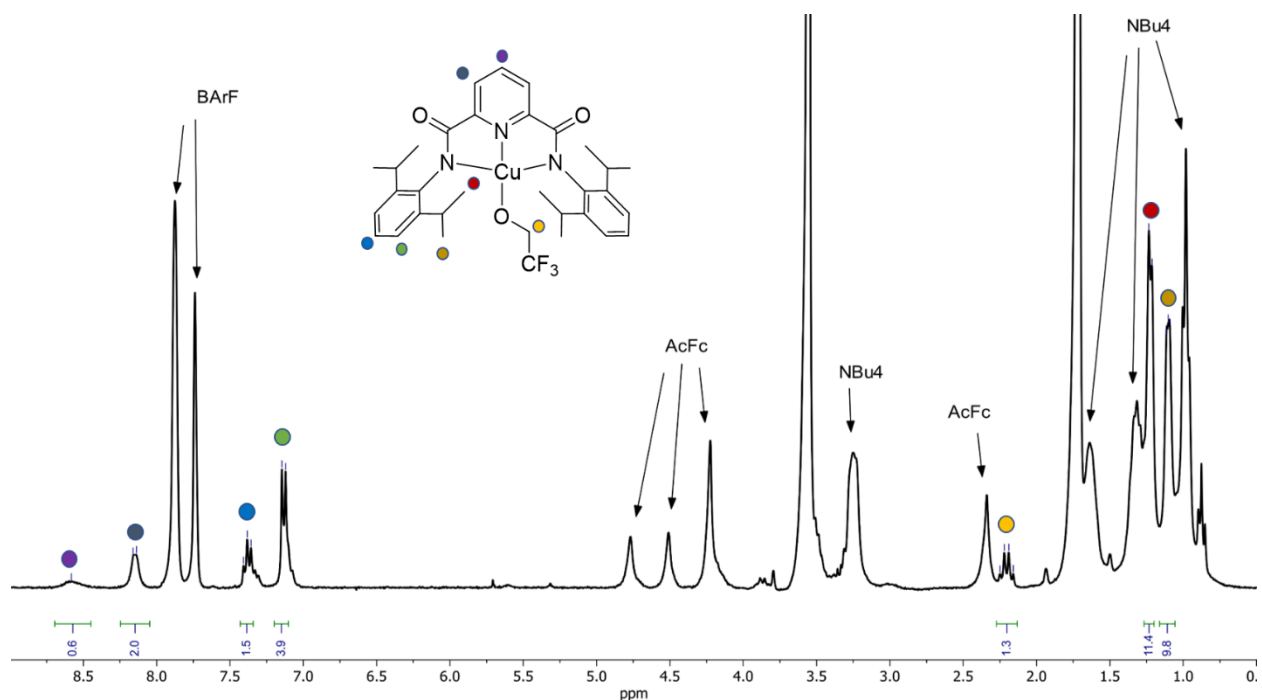

**Figure S30.**  $^1\text{H}$  NMR spectrum of the reaction of  $\text{L}^{\text{H}}\text{CuOCH}_2\text{CF}_3$  (300 MHz,  $\text{THF-}d_8$ ,  $-80\text{ }^\circ\text{C}$ ). Resonances corresponding to  $[\text{NBu}_4][\text{BAR}^{\text{F}}_4]$  and AcFc are annotated.

## $^1\text{H}$ NMR Analysis of $\text{L}^{\text{OMe}}\text{CuOCH}_2\text{CF}_3$

$^1\text{H}$  and  $^{13}\text{C}\{^1\text{H}\}$  NMR spectra were acquired using the General Procedure with the following modifications: isolated  $\text{L}^{\text{OMe}}\text{CuOCH}_2\text{CF}_3$  (4.4 mg) prepared as described for crystallization (see section IX below) was placed in a J. Young tube and cooled to  $-20\text{ }^\circ\text{C}$  in a salt-water ice bath.  $\text{CD}_2\text{Cl}_2$  (0.5 mL) was subsequently injected and mixed at  $-20\text{ }^\circ\text{C}$  until dissolved. The sample was placed in a pre-cooled spectrometer ( $-15\text{ }^\circ\text{C}$ ) and the spectrum immediately acquired.  $^1\text{H}$  NMR (500 MHz,  $\text{CD}_2\text{Cl}_2$ ,  $-15^\circ\text{C}$ ):  $\delta$  (ppm) 1.13 (d, 12H,  $J^{\beta}_{\text{HH}}=6.74\text{ Hz}$ ,  $-\text{CH}_3$  (*i*-Pr)), 1.21 (d, 12H,  $J^{\beta}_{\text{HH}}=6.77\text{ Hz}$ ,  $-\text{CH}_3$  (*i*-Pr)), 2.06 (q, 2H,  $J^{\beta}_{\text{HF}}=9.0\text{ Hz}$ ,  $-\text{CH}_2-$ ), 3.30 (septet, 4H,  $J^{\beta}_{\text{HH}}=6.45\text{ Hz}$ ,  $-\text{CH}$  (*i*-Pr)), 4.12 (s, 3H, *p*- $\text{OCH}_3$ ), 7.12 (d, 4H,  $J^{\beta}_{\text{HH}}=7.7\text{ Hz}$ , aryl  $-\text{CH}$  (*meta*)), 7.45 (t, 2H,  $J^{\beta}_{\text{HH}}=7.7\text{ Hz}$ , aryl  $-\text{CH}$  (*para*)), 7.54 (s, 2H, pyridyl  $-\text{CH}$ ).  $^{13}\text{C}\{^1\text{H}\}$  NMR (126 MHz,  $\text{CD}_2\text{Cl}_2$ ,  $-15^\circ\text{C}$ ):  $\delta$ (ppm) 22.8 ( $-\text{CH}_3$ , *i*-Pr), 24.2 ( $-\text{CH}_3$ , *i*-Pr), 29.9 ( $-\text{CH}_3$ , *p*- $\text{OCH}_3$ ), 58.4 ( $-\text{CH}_2-$ ), 70.6 ( $-\text{CF}_3$ ), 112.7, 124.2, 130.3, 139.6, 148.8, 149.2, 169.0, 173.2.

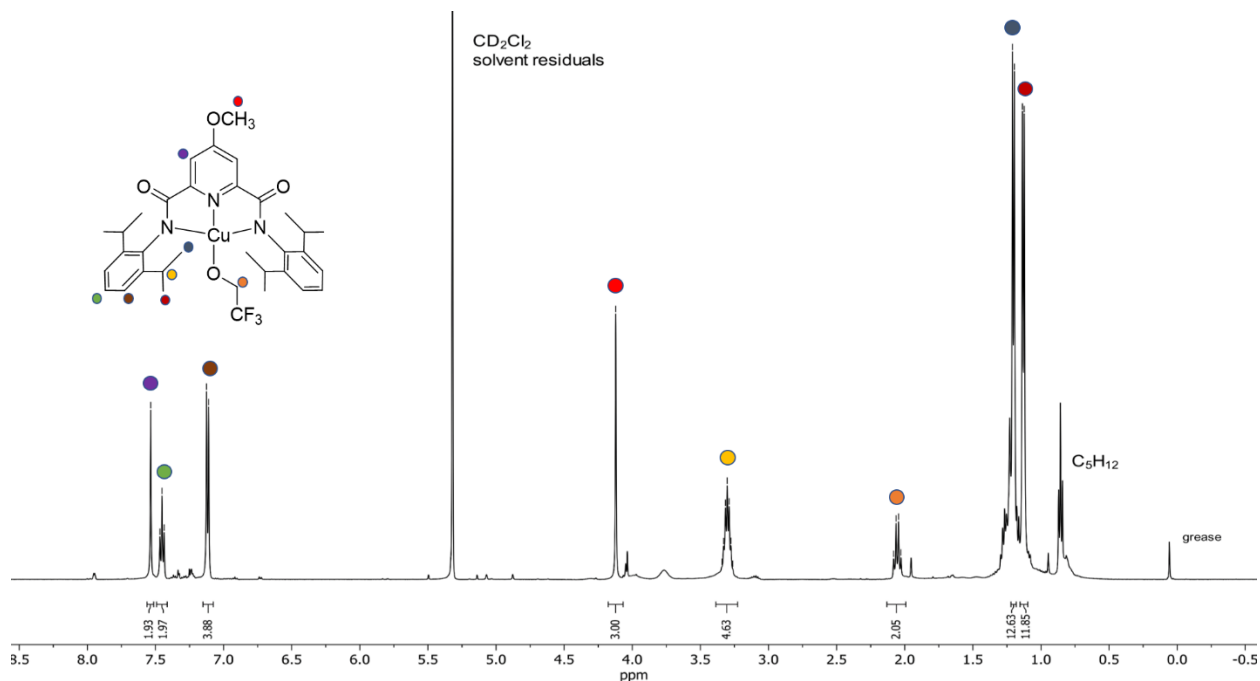

**Figure S31.**  $^1\text{H}$  NMR spectrum of isolated crystalline  $\text{L}^{\text{OMe}}\text{CuOCH}_2\text{CF}_3$  at  $-15\text{ }^\circ\text{C}$ . Identified adventitious contaminants (pentane, silicone grease) and solvent residuals are indicated.

### $^{13}\text{C}\{^1\text{H}\}$ NMR Spectrum of $\text{L}^{\text{OMe}}\text{CuOCH}_2\text{CF}_3$

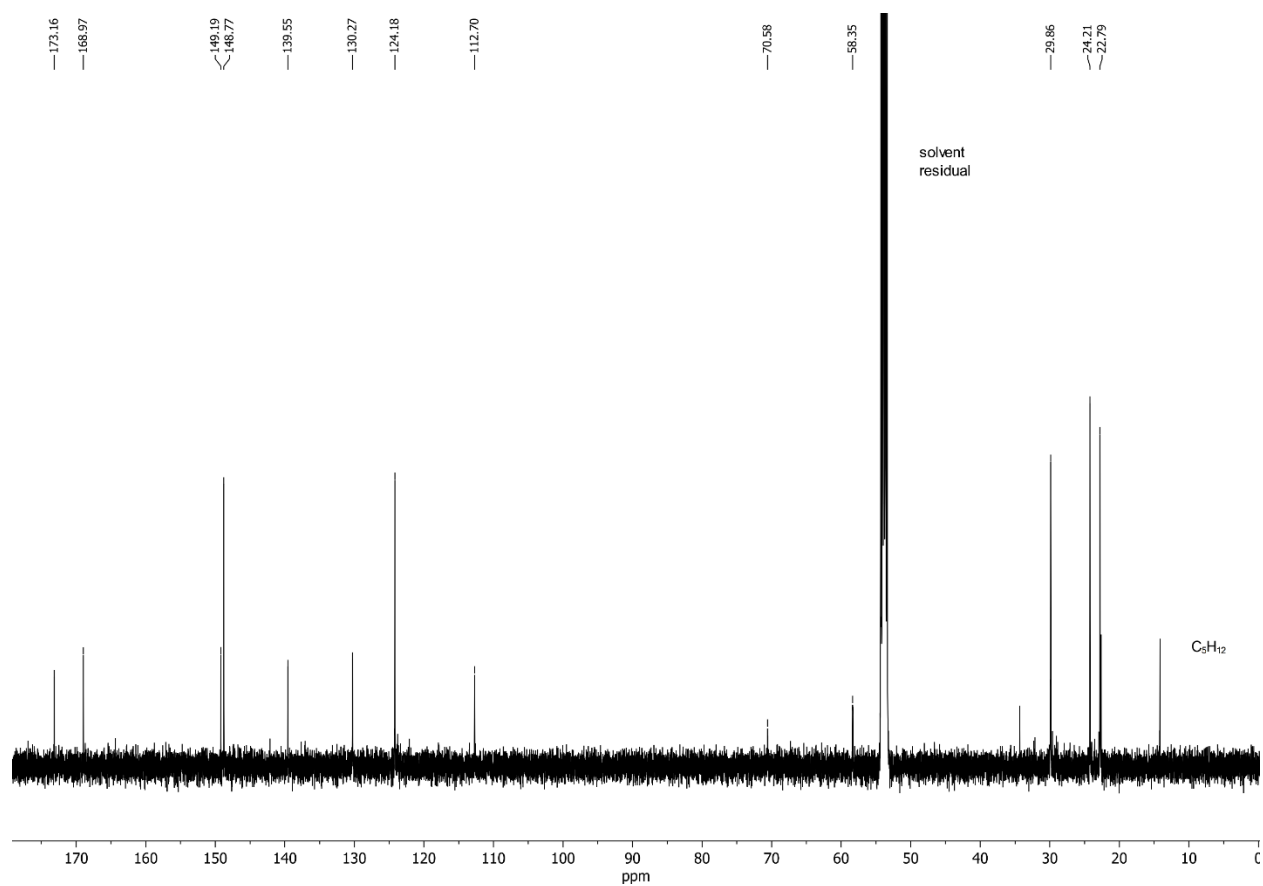

**Figure S32.**  $^{13}\text{C}\{^1\text{H}\}$  NMR spectrum of isolated  $\text{L}^{\text{OMe}}\text{CuOCH}_2\text{CF}_3$  at  $-15\text{ }^\circ\text{C}$ . The isopropyl  $-\text{CH}$  signal is obscured by  $\text{CD}_2\text{Cl}_2$  solvent residuals. Solvent residuals and adventitious solvents are indicated.



## VII. SOLUTION STABILITY OF OXIDIZED Cu SPECIES

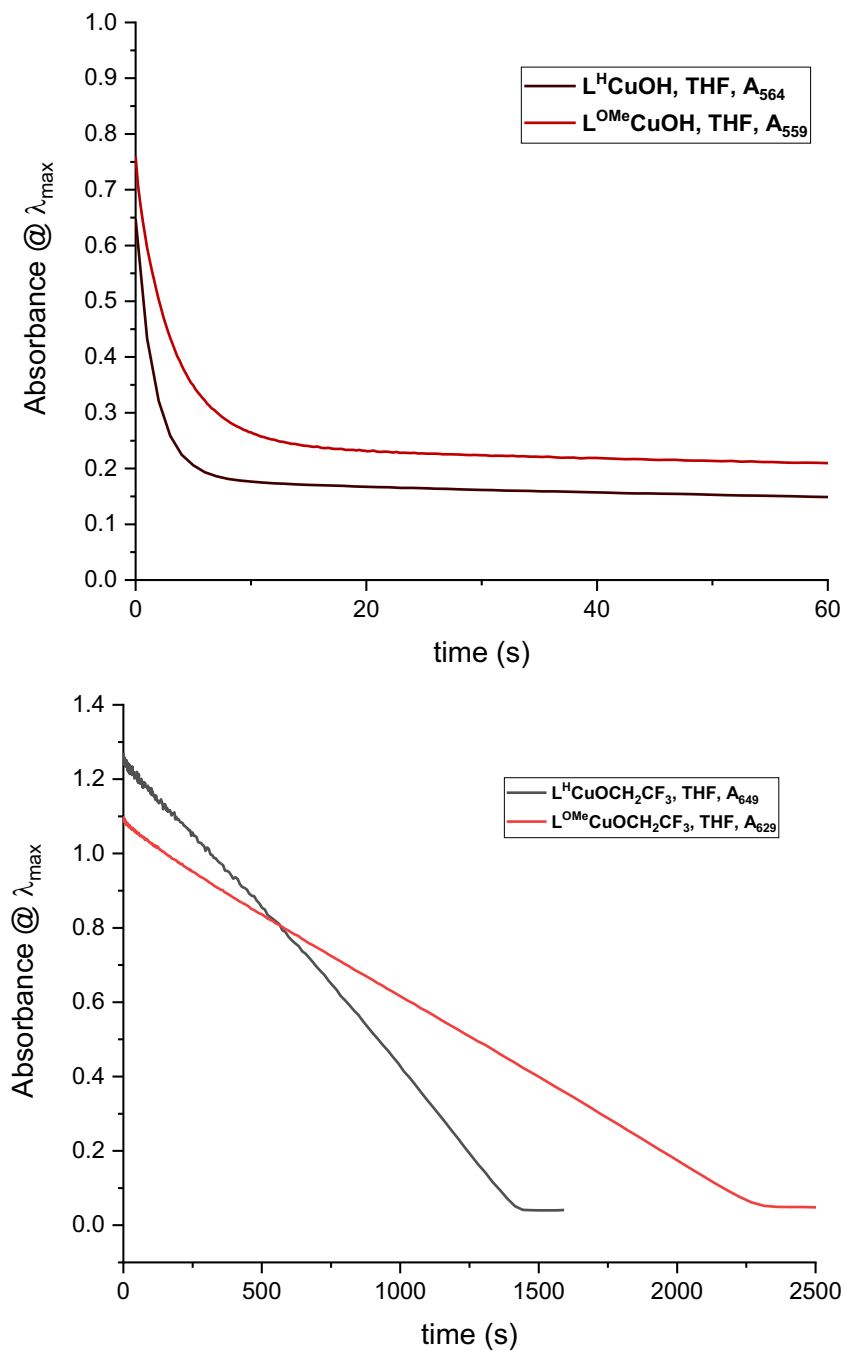

**Figure S33.** UV-Vis traces of the room temperature self-decay (in THF) of  $[CuOH]^{2+}$  compounds (top) and  $[CuOCH_2CF_3]^{2+}$  compounds (bottom). Traces are plotted with respect to the observed  $\lambda_{\max}$  of each complex.

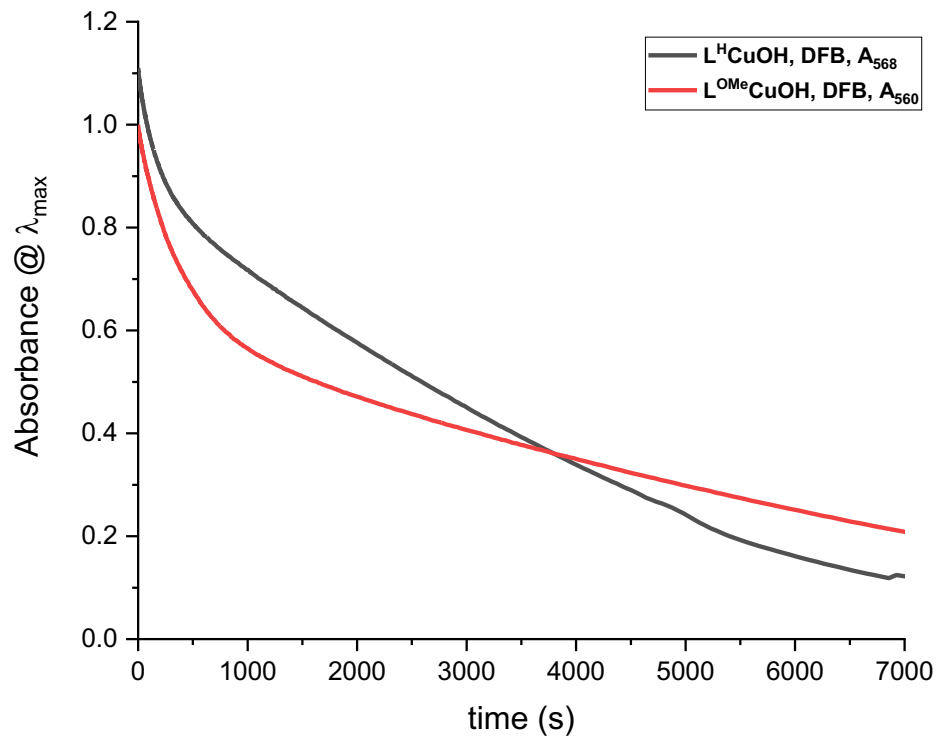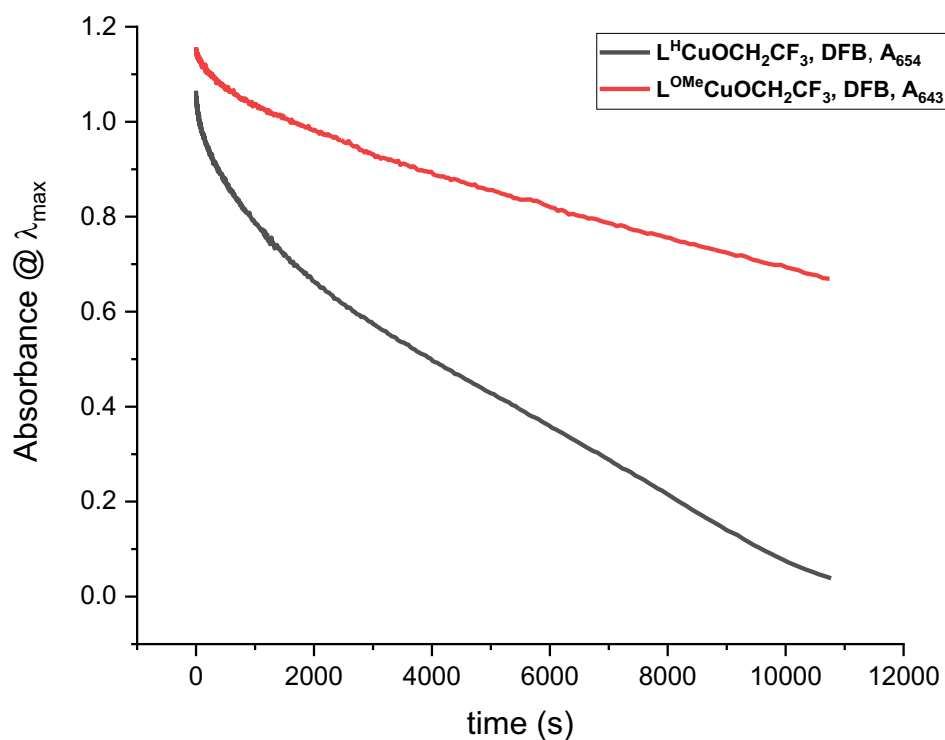

**Figure S34.** UV-Vis traces of the room temperature self-decay (in DFB) of  $[\text{CuOH}]^{2+}$  compounds (top) and  $[\text{CuOCH}_2\text{CF}_3]^{2+}$  compounds (bottom). Traces are plotted with respect to the observed  $\lambda_{\text{max}}$  of each complex.

## Analysis of Room Temperature Self-Decay Experiments

We compared the stabilities of the four  $[\text{CuOR}]^{2+}$  species by spectroscopically monitoring their room-temperature self-decays in THF and 1,2-difluorobenzene (DFB). The kinetic traces in general suggest that the decay process is complex and involves multiple mechanisms, as they display varying combinations of linear and curved (exponential) components. We therefore offer no mechanistic proposals for decay pathways and present these data in the context of elucidating comparative solution stability among the four studied complexes. Trends in the overall lifetimes of the four complexes are evident: Employing  $\text{L}^{\text{OMe}}$  and  $-\text{OCH}_2\text{CF}_3$  both lead to an increase in stability, in varying amounts under different solvent conditions.

In THF, both  $\text{L}^{\text{H}}\text{CuOH}$  and  $\text{L}^{\text{OMe}}\text{CuOH}$  decay rapidly and mostly exponentially, with the bulk of the decay process happening over 10 s. The trifluoroethoxides  $\text{L}^{\text{H}}\text{CuOCH}_2\text{CF}_3$  and  $\text{L}^{\text{OMe}}\text{CuOCH}_2\text{CF}_3$ , on the other hand, decay much more slowly, and, curiously, along a linear trajectory that suggests zeroth-order decay with respect to  $[\text{Cu}]$ . Under the typically utilized concentration of 0.1 mM, observed lifetimes are around 1400 s for the former and 2300 s for the latter. Overall, in THF, varying the auxiliary ligand from hydroxide to trifluoroethoxide makes a much greater impact on lifetime than does changing the supporting ligand from L to  $\text{L}^{\text{OMe}}$ .

In DFB, the range of variations is more subdued, with drastically longer lifetimes in all cases. The two hydroxide complexes decay similarly quickly overall, but along different complex curves featuring pseudo-exponential and linear regimes.  $\text{L}^{\text{H}}\text{CuOH}$  decays more steadily, whereas  $\text{L}^{\text{OMe}}\text{CuOH}$  decays more rapidly in the initial pseudo-exponential regime, but slows down significantly beyond 1000 s. This leads to approximately 13%  $\text{L}^{\text{OMe}}\text{CuOH}$  remaining after 2 h, whereas there was no more than 4%  $\text{L}^{\text{H}}\text{CuOH}$  left after the same time. Between the two trifluoroethoxides, on the other hand, there was a much more pronounced difference: While  $\text{L}^{\text{H}}\text{CuOCH}_2\text{CF}_3$  decayed completely in 3 h,  $\text{L}^{\text{OMe}}\text{CuOCH}_2\text{CF}_3$  had only decayed to 58%, a level

that the former compound reached in under 3000 s. All in all, in the oxidation-resistant solvent environment provided by DFB, both ligand modifications bring comparable improvements to the lifetime of the  $[\text{CuOR}]^{2+}$  state, and the combination of both results in the greatest stability.

### VIII. PHENOL REACTIVITY OF $[\text{CuOR}]^{2+}$ SPECIES

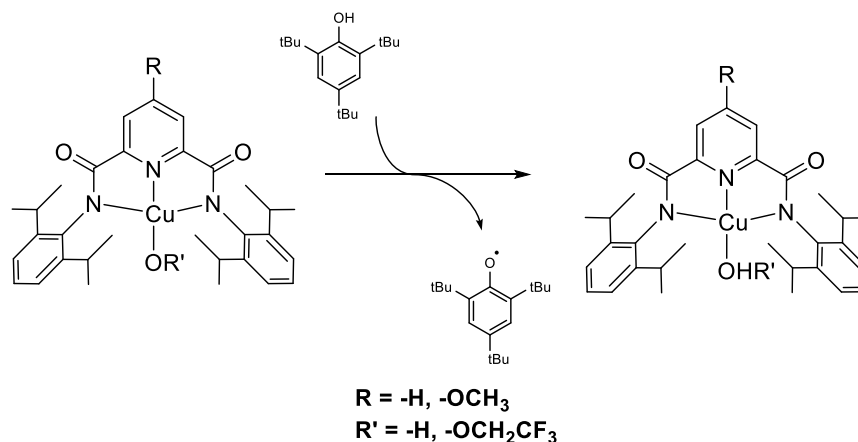

#### General procedure for the reaction of $[\text{CuOR}]^{2+}$ complexes with ${}^{\text{t}^{\text{t}^{\text{b}}}}\text{PhOH}$

In a glovebox, a cuvette containing DFB (1.7 mL) is outfitted with a septum and placed in a UV-Vis cell pre-cooled to  $-25\text{ }^\circ\text{C}$ . The solution is allowed to cool for 7-15 minutes at this temperature. At this time, a solution of the corresponding Cu(II) species (0.1 mL, 2mM in DFB) is injected, and the initial spectrum taken. To this solution, a solution of oxidant ( $\text{FcBAr}^{\text{F}_4}$  or  $\text{AcFcBAr}^{\text{F}_4}$ , 0.1 mL, 2mM) is added to generate the active  $[\text{CuOR}]^{2+}$  species; once the species is observed to have fully formed, a solution of 2,4,6-tri-tert-butylphenol ( ${}^{\text{t}^{\text{t}^{\text{b}}}}\text{PhOH}$ , 0.1 mL, 2mM or 100mM) is added, causing a decay of  $[\text{CuOR}]^{2+}$  signal. Decay spectra were collected and  $k_2$  values calculated using ReactLab v1.1 with the concentrations described above. Reaction spectra, along with representative fit plots for each reaction, are shown below. Calculations for  $[\text{CuOH}]^{2+}$  species were performed using 1.1 eq of  ${}^{\text{t}^{\text{t}^{\text{b}}}}\text{PhOH}$ .

**Table S1.** Rate constants for  $L^Y\text{CuOR} + \text{ttbPhOH}$  reaction.<sup>a</sup>

| Trial Number | $L^H\text{CuOH}$<br>(+ 1eq $\text{ttbPhOH}$ ) | $L^{\text{OMe}}\text{CuOH}$<br>(+ 1eq $\text{ttbPhOH}$ ) | $L^H\text{CuOCH}_2\text{CF}_3$<br>(+ 50eq $\text{ttbPhOH}$ ) | $L^{\text{OMe}}\text{CuOCH}_2\text{CF}_3$<br>(+ 50eq $\text{ttbPhOH}$ ) |
|--------------|-----------------------------------------------|----------------------------------------------------------|--------------------------------------------------------------|-------------------------------------------------------------------------|
| 1            | 13300                                         | 9220                                                     | 3.0                                                          | 1.5                                                                     |
| 2            | 17300                                         | 13100                                                    | 2.8                                                          | 1.7                                                                     |
| 3            | 17300                                         | 13000                                                    | 3.0                                                          | 1.4                                                                     |
| Average      | 15900                                         | 11800                                                    | 3.0                                                          | 1.5                                                                     |

<sup>a</sup> Individual  $k_2$  values for the reaction of  $[\text{CuOR}]^{2+}$  complexes with  $\text{ttbPhOH}$ , in units  $\text{M}^{-1}\text{s}^{-1}$ . Equivalents of  $\text{ttbPhOH}$  used are indicated.

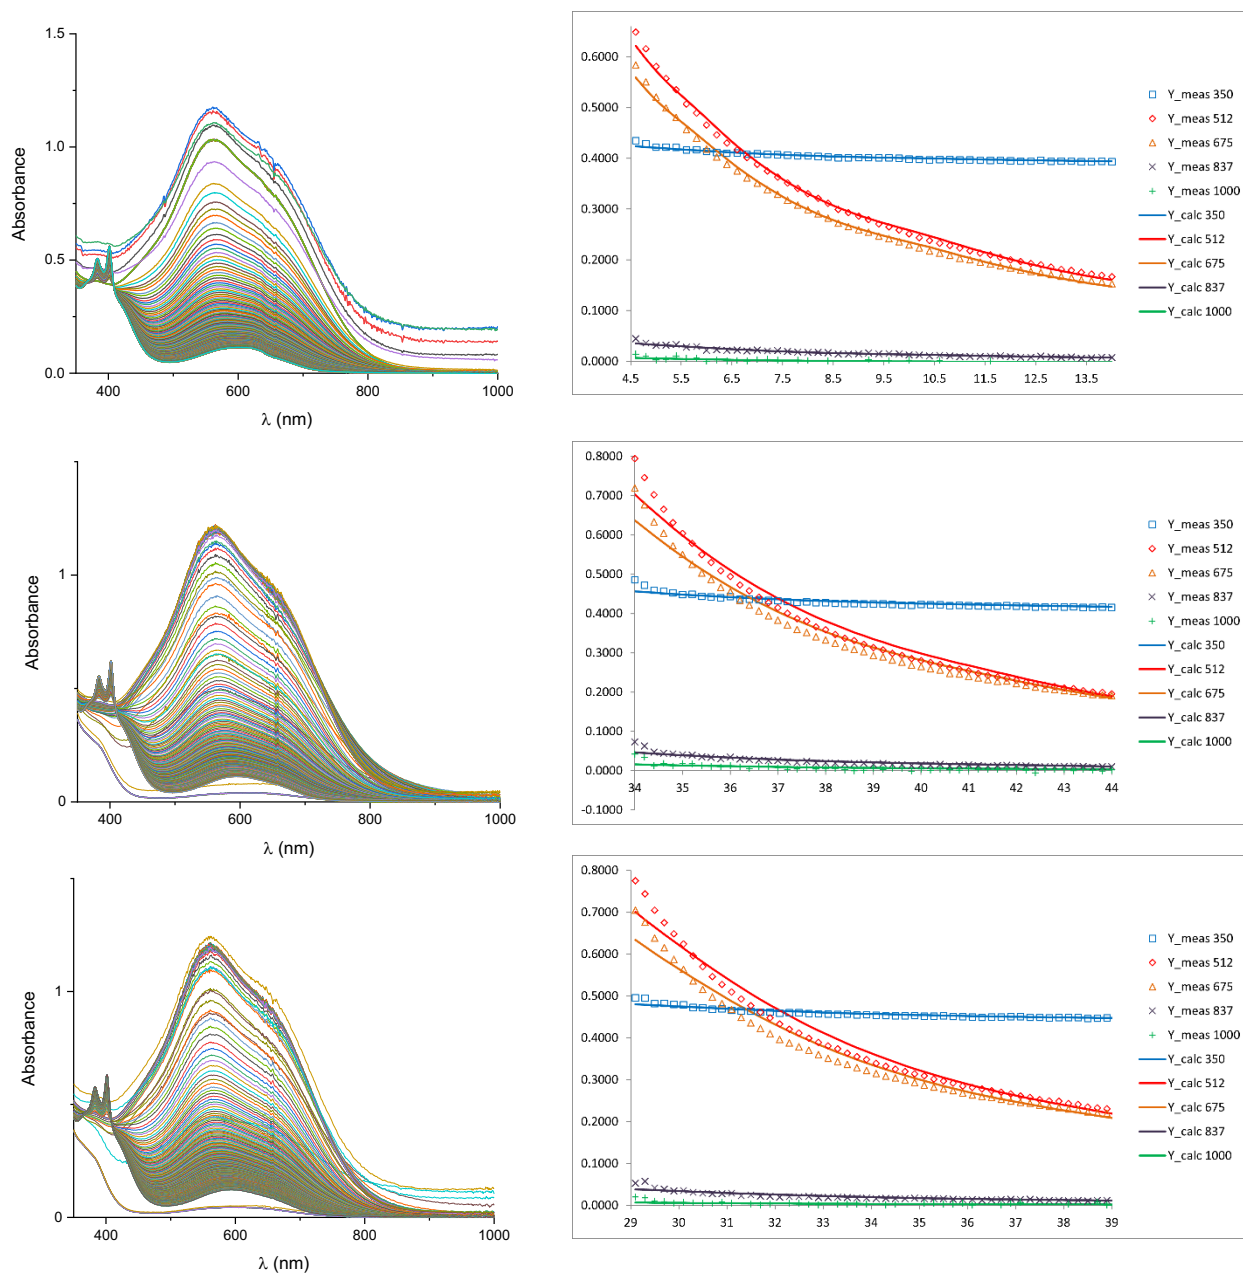

**Figure S35.** Triplicate UV-Vis reaction traces of  $L^H\text{CuOH} + {}^{\text{t}^b}\text{PhOH}$  (1 eq), DFB,  $-25^\circ\text{C}$ . The ensemble reaction traces are plotted on left, and the corresponding second-order model fits are shown to the right (Absorbance vs. Time (s)).

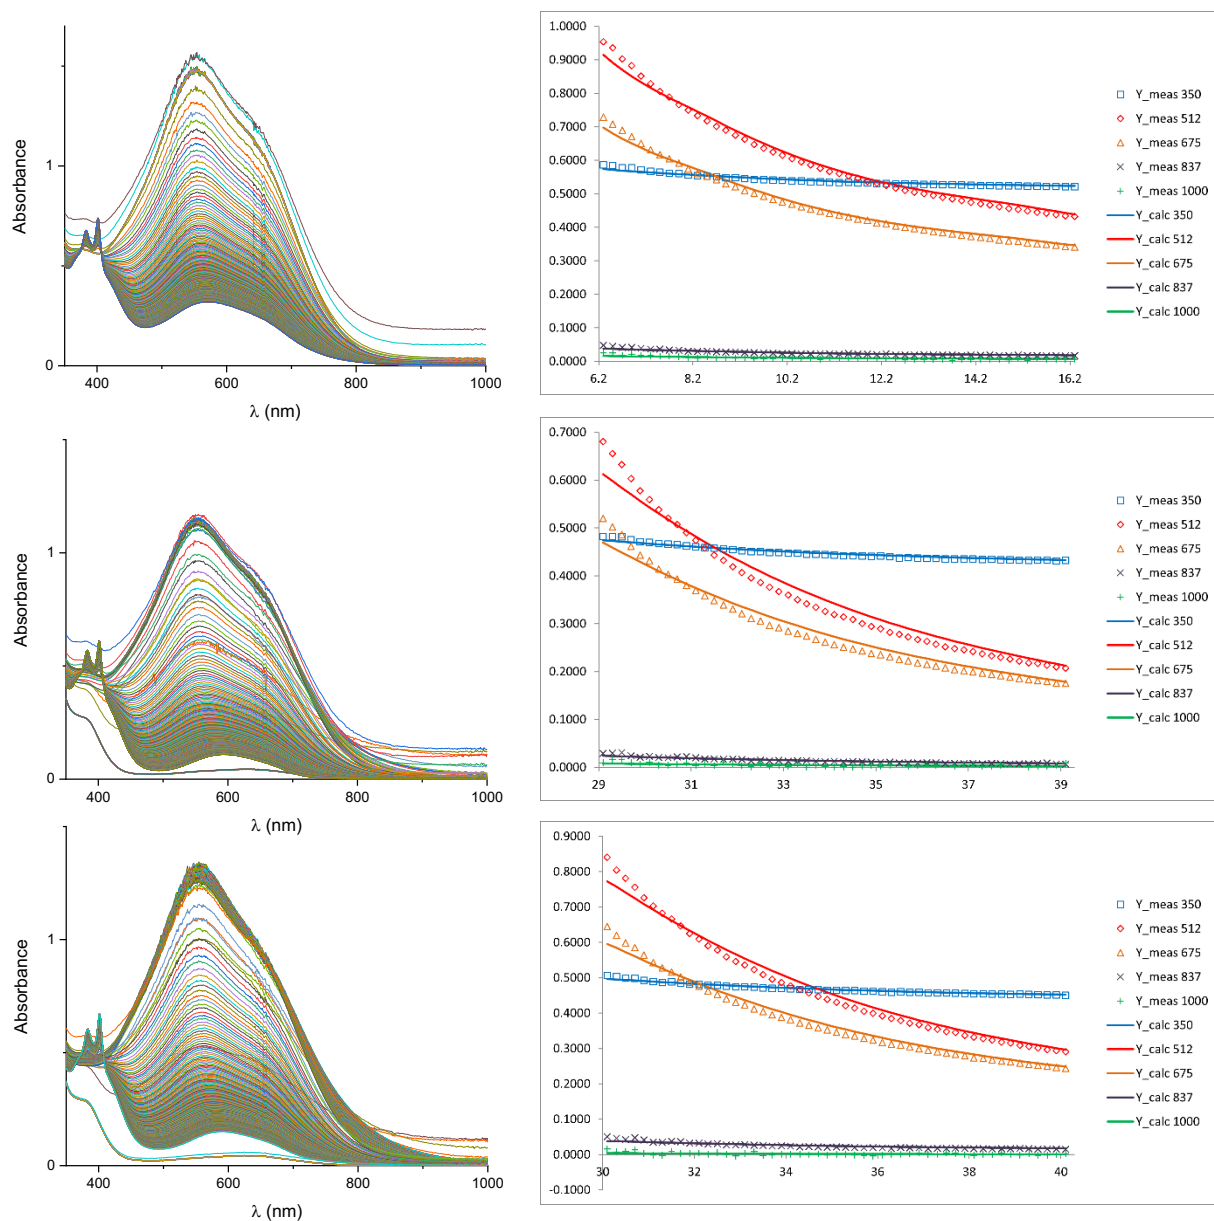

**Figure S36.** Triplicate UV-Vis reaction traces of  $L^{OMe}CuOH + t^bPhOH$  (1 eq), DFB,  $-25\text{ }^\circ\text{C}$ . The ensemble reaction traces are plotted on left, and the corresponding second-order model fits are shown to the right (Absorbance vs. Time (s)).

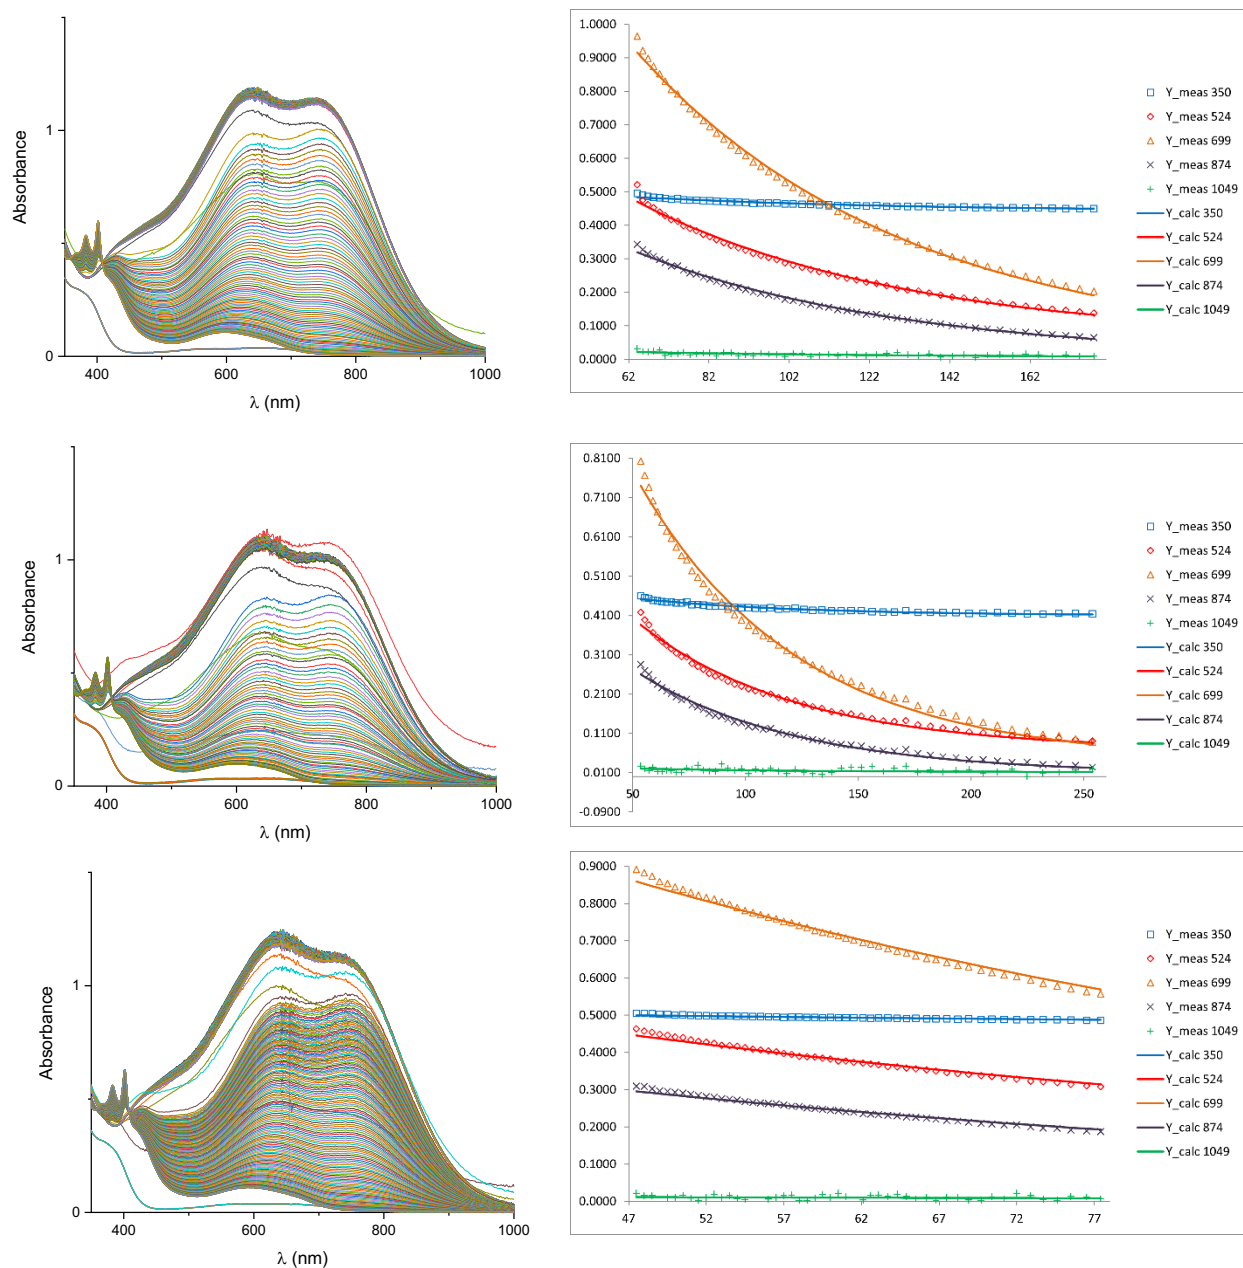

**Figure S37.** Triplicate UV-Vis reaction traces of  $L^H\text{CuOCH}_2\text{CF}_3 + {}^{ttb}\text{PhOH}$  (50 eq), DFB,  $-25^\circ\text{C}$ . The ensemble reaction traces are plotted on left, and the corresponding second-order model fits are shown to the right (Absorbance vs. Time (s)).



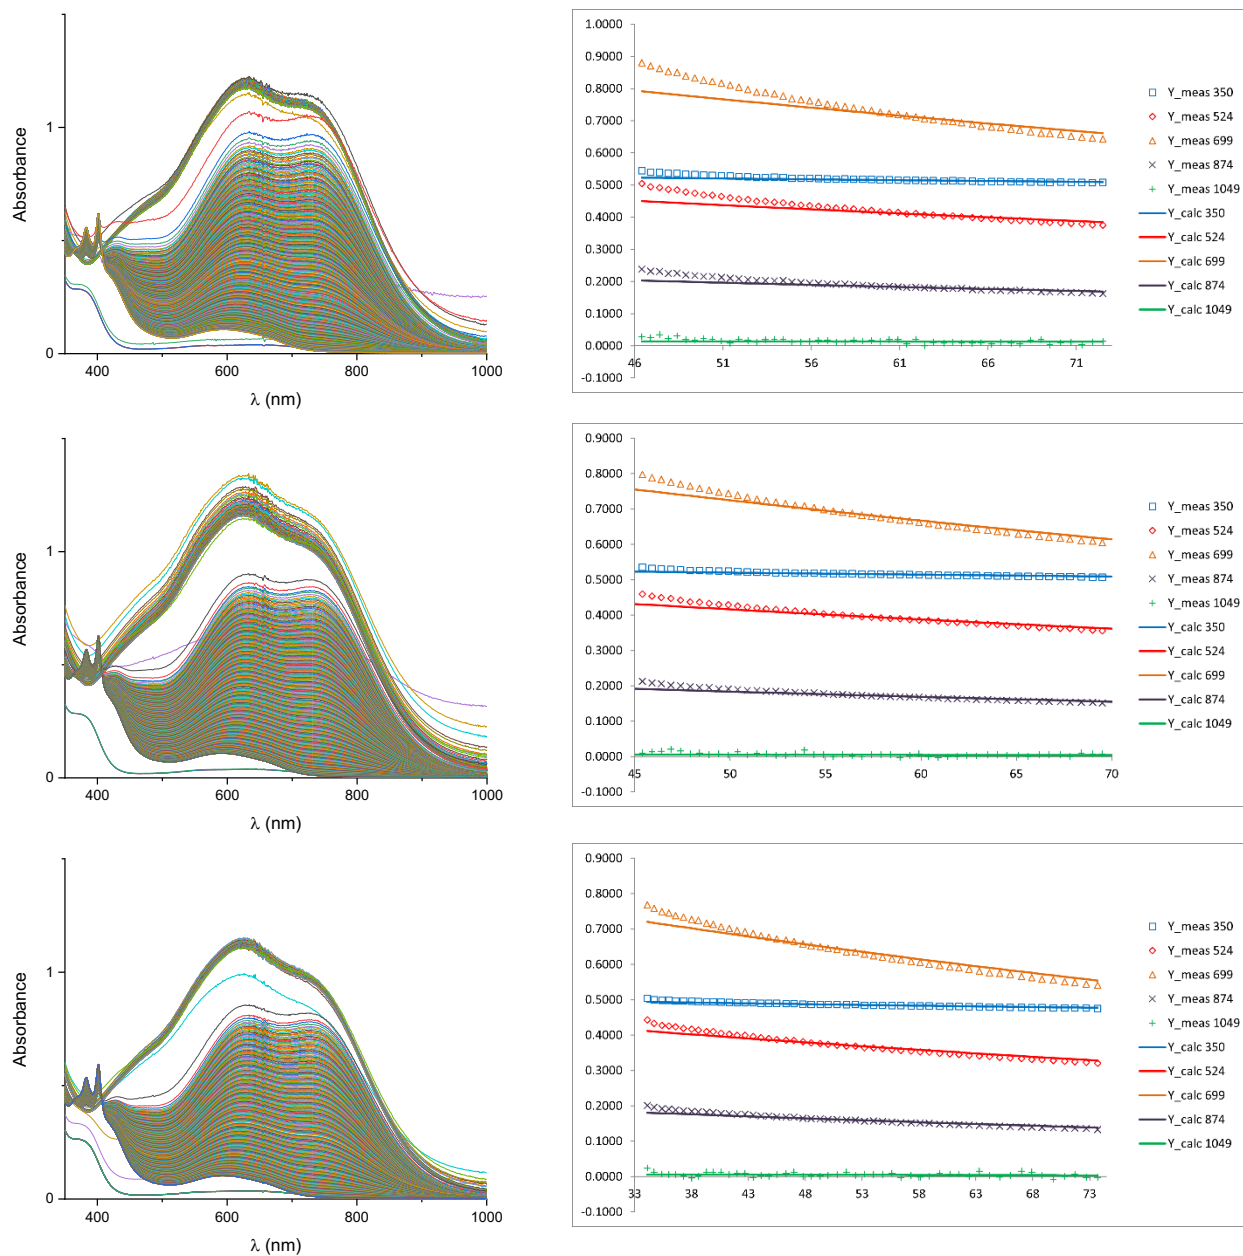

**Figure S38.** Triplicate UV-Vis reaction traces of  $L^{OMe}CuOCH_2CF_3 + {}^{t}bPhOH$  (50 eq), DFB,  $-25^\circ C$ . The ensemble reaction traces are plotted on left, and the corresponding second-order model fits are shown to the right (Absorbance vs. Time (s)).

## IX. CRYSTALLIZATION AND ISOLATION OF [CuOR]<sup>2+</sup> SPECIES

### L<sup>OMe</sup>CuOH

[NBu<sub>4</sub>][L<sup>OMe</sup>CuOH] (20 mg, 0.24 mmol) was dissolved in 1,2-DFB (0.5 mL) and cooled to -30 °C. To this solution, a cooled solution of FcBAR<sup>F</sup><sub>4</sub> (25 mg, .0.24 mmol, 1 eq) in 1,2-DFB (0.5 mL) was added, immediately producing an ink-like purple solution. This solution was layered with pentane (~18 mL) and placed at -30 °C. Dark violet-red crystals of L<sup>OMe</sup>CuOH surrounded by a light brown-green viscous mass (presumably NBu<sub>4</sub>BAR<sup>F</sup><sub>4</sub> and decay products) were observed in 24h. The sample was then stored at -80 °C until data collection. Crystals also formed spontaneously in minutes when glassware containing leftover product solution (prior to addition of pentane) was left exposed to atmosphere (inert or ambient). Attempts to isolate L<sup>OMe</sup>CuOH from the oily residue were unsuccessful, but the latter's amorphous character permitted the use of the crystals for X-ray diffraction without undue interference.

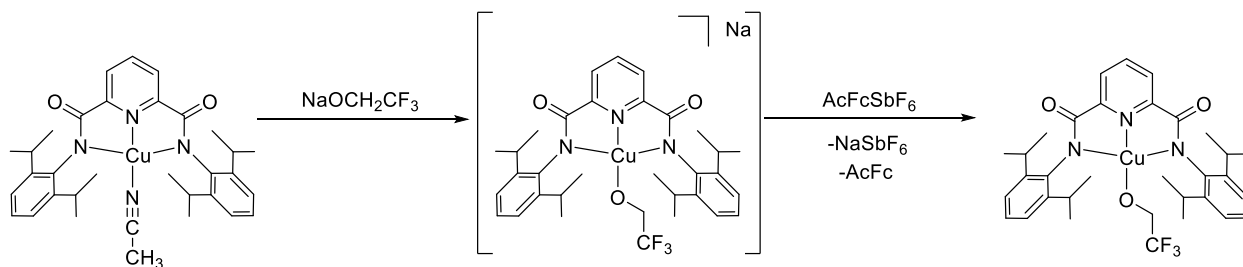

### L<sup>H</sup>CuOCH<sub>2</sub>CF<sub>3</sub>.

In a scintillation vial, L<sup>H</sup>CuMeCN (58.8 mg, 0.100 mmol) was dissolved in ca. 1.5 mL THF. A solution of NaOCH<sub>2</sub>CF<sub>3</sub> (12.2 mg, 0.100 mmol, 1 eq.) in ca. 1.5 mL THF was added, resulting in immediate color change from reddish-brown to teal-blue. Addition of ca. 10 mL of diethyl ether resulted in partial formation of teal-blue powdery precipitation, which gave way to violet microcrystalline clumps, which over the course of ca. 1 hour consumed all colored material. After decantation, this solid was found to be poorly soluble in THF, so it was washed with THF, diethyl

ether, pentane, and dried *in vacuo*. The resulting violet powder was difficult to characterize and so was used as-is, assuming the molecular composition of  $\text{Na}[\text{L}^{\text{H}}\text{CuOCH}_2\text{CF}_3]$  for stoichiometry purposes. We assume the color and solubility changes arose due to a transition from solution/amorphous to a packed crystalline state (crystal domains were too small for X-ray characterization).

Of the above powder, 33.5 mg (0.050 mmol) was transferred into a new scintillation vial and suspended in ca. 1.5 mL  $\text{CH}_2\text{Cl}_2$ . A suspension of  $[\text{AcFc}][\text{SbF}_6]$  (23.2 mg, 0.050 mmol, 1 eq.) in ca. 1.5 mL  $\text{CH}_2\text{Cl}_2$  was added, resulting in rapid formation of a dark blue solution with insoluble particles. After mixing for ca. 1 minute, the mixture was passed through a PTFE syringe filter along with an additional 1 mL of  $\text{CH}_2\text{Cl}_2$ . The dark blue filtrate was evaporated under reduced pressure. Approximately 5 mL of pentane was added to remove acetylferrocene, however, it turned green-blue, presumably bearing a mixture of AcFc and  $\text{L}^{\text{H}}\text{CuOCH}_2\text{CF}_3$ . A second 5 mL shot of pentane was added to the product solids and agitated, turning blue, then decanted off and set up to evaporate into heptane at  $-30\text{ }^\circ\text{C}$ . Very small dark blue crystals began forming after 24 hours, and continued to grow as the pentane evaporated completely over several days. Despite their small size, these crystals were found to be sufficient for x-ray diffraction. Based on the appearance of the solid remaining post-extraction, the compound is only modestly soluble in pentane as the bulk remained undissolved. However, attempts to dissolve the remaining product solid in  $\text{CH}_2\text{Cl}_2$  or mixtures of  $\text{CH}_2\text{Cl}_2$  and pentane and precipitate by layering with pentane failed to afford any crystals. Attempts to isolate  $\text{L}^{\text{H}}\text{CuOCH}_2\text{CF}_3$  as a pure substance were thwarted by the constant evolution of less soluble yellow-green decay species as the material was handled.

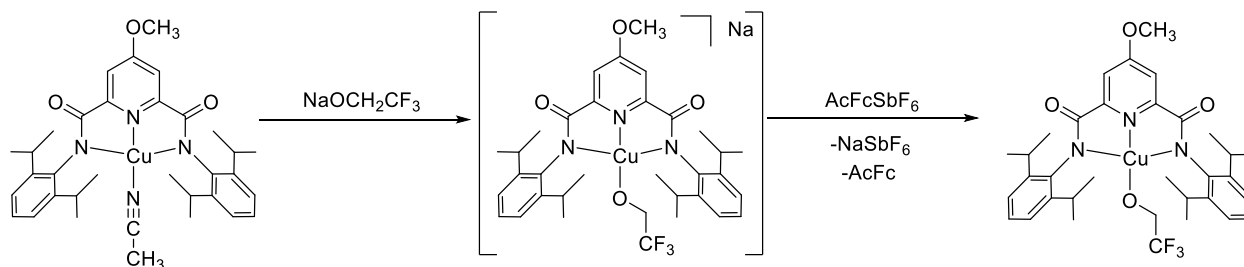

### **L<sup>OMe</sup>CuOCH<sub>2</sub>CF<sub>3</sub>.**

In a scintillation vial, L<sup>OMe</sup>CuMeCN (123.6 mg, 0.200 mmol) was dissolved in ca. 1.5 mL THF. A solution of NaOCH<sub>2</sub>CF<sub>3</sub> (24.4 mg, 0.200 mmol, 1 eq.) in ca. 1.5 mL THF was added, resulting in immediate color change from reddish-brown to teal-blue. Addition of ca. 5 mL diethyl ether and 10 mL pentane resulted in precipitation of teal-blue powder. The supernatant was decanted and the powder washed with diethyl ether and pentane, then dried *in vacuo* overnight. As with the L<sup>H</sup>CuOCH<sub>2</sub>CF<sub>3</sub> preparation, this powder was difficult to characterize and was instead used as-is, assuming a composition of Na[L<sup>OMe</sup>CuOCH<sub>2</sub>CF<sub>3</sub>] for stoichiometry purposes.

Of the above powder, 64.5 mg (0.092 mmol) was transferred into a new scintillation vial and suspended in ca. 1.5 mL CH<sub>2</sub>Cl<sub>2</sub>. A suspension of [AcFc][SbF<sub>6</sub>] (42.8 mg, 0.092 mmol, 1 eq) in ca. 1.5 mL CH<sub>2</sub>Cl<sub>2</sub> was added, resulting in rapid formation of a dark blue solution with insoluble particles; 0.5 mL DFB was added to assist in solubilization and subsequent crystal growth (it was not found to incorporate into the crystal, however, and may not be needed). After mixing for ca. 1 minute, the mixture was passed through a PTFE syringe filter along with an additional 1 mL of CH<sub>2</sub>Cl<sub>2</sub> into a scintillation vial. The dark blue filtrate was evaporated under reduced pressure to approximately 1 mL in volume, then layered with ca. 20 mL of pentane, and stored at -30 °C. After 48 hours, the entire volume appeared dark blue; the extent of crystallization was unclear but it was evident that the compound was challenging to precipitate. The top third of the solution was removed and replaced with pentane, then the mixture was again stored at -30 °C. After 24 hours,

the procedure was repeated, and after another 24 hours the mother liquor was dark green, but with solid clearly visible. After decanting ca. 90% of the liquid, replacing with pentane, mixing and repeating twice, the solid, comprised of large chunks of dark violet crystalline material with a golden semi-metallic shine, was considered “isolated” but stored under pentane at -30 °C in order to prevent loss of crystallinity. Samples of the material used for NMR, elemental analysis, and UV-visible spectroscopy were dried *in vacuo* prior to use. Individual crystals from these masses were of sufficient quality for x-ray diffraction.

Elemental analysis of the material was attempted but failed due to deviation in the amount of carbon found (Anal. calcd (%) for  $C_{34}H_{41}CuF_3N_3O_4$  (MW 676.26): C 60.39, H 6.11, N 6.21; Found: 62.15, H 6.24, N 6.27).  $^1H$  NMR (section VI) and UV-visible spectroscopy (**Figure S39**) indicate that the material as a bulk is composed of primarily  $L^{OMe}CuOCH_2CF_3$  and small amounts of Cu(II) decay products.

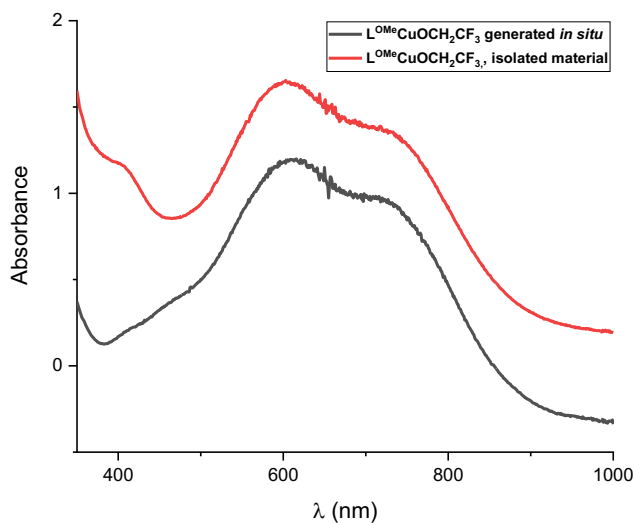

**Figure S39.** UV-Vis spectrum of  $L^{OMe}CuOCH_2CF_3$ , isolated. A spectrum of  $L^{OMe}CuOCH_2CF_3$  generated *in situ* from  $[NBu_4][L^{OMe}CuOCH_2CF_3]$  is shown for comparison.

## X. X-RAY CRYSTALLOGRAPHY

X-ray diffraction measurements were collected with a Mo K $\alpha$  or Cu K $\alpha$  source on either a Bruker D8 VENTURE diffractometer equipped with a Photon II CPAD using normal parabolic mirrors as monochromators or a Bruker X8 diffractometer equipped with a Kappa Apex II CCD using a graphite monochromator. Data collection and processing was performed within the Bruker APEX3<sup>11</sup> software suite, using SAINT<sup>11</sup> for data reduction and SADABS<sup>12</sup> for scaling and absorption correction. Structure solutions were performed with SHELXT<sup>13</sup> or SHELXS<sup>14</sup> using OLEX 2<sup>15</sup> or ShelXle<sup>16</sup> as graphical interfaces. The structures were refined against F<sup>2</sup> on all data by full matrix least squares with SHELXL (see cif files for structure-specific details).<sup>14</sup> Non-merohedral twinning was present in the data of L<sup>H</sup>CuOCH<sub>2</sub>CF<sub>3</sub>, necessitating additional steps: Domain assignment of reflections for unit cells determination was performed manually, and TWINABS<sup>12</sup> was used to process and scale the integrated data. The structures have been deposited to the CCDC; the accession numbers are 2053118-2053123.

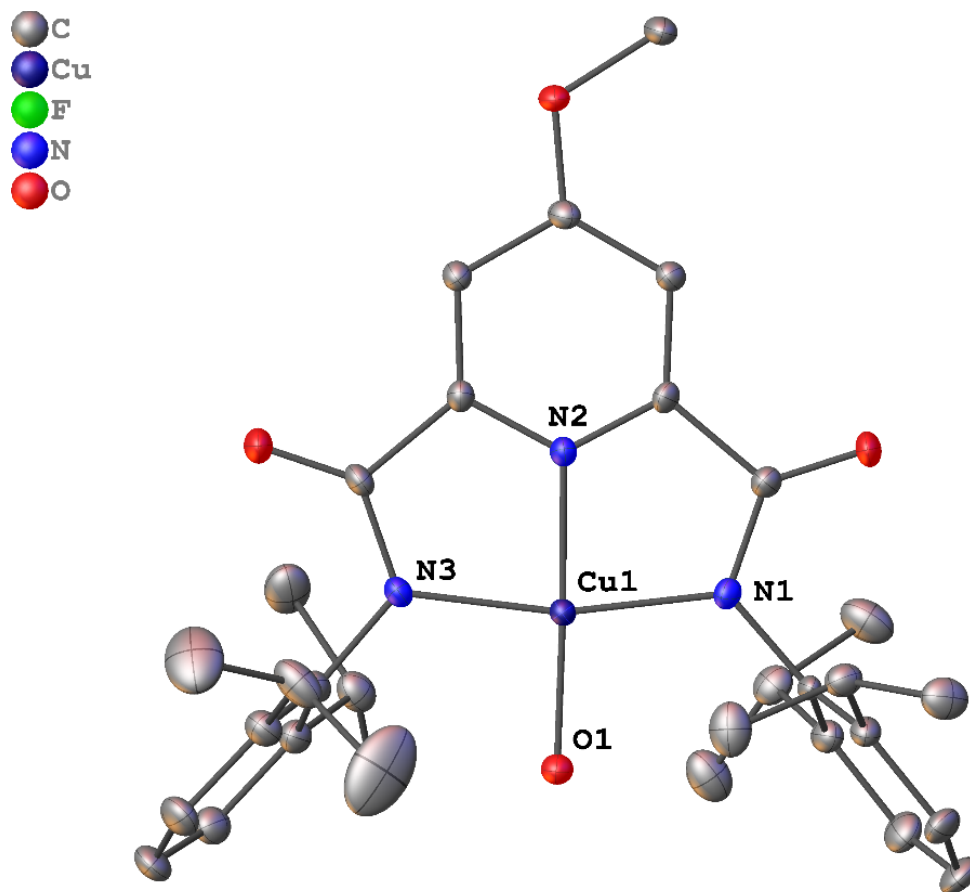

**Figure S40.** Thermal ellipsoid diagram of L<sup>OMe</sup>CuOH·2DFB, showing all nonhydrogen atoms at 50% probability level. Two 1,2-difluorobenzene molecules have been omitted for clarity.

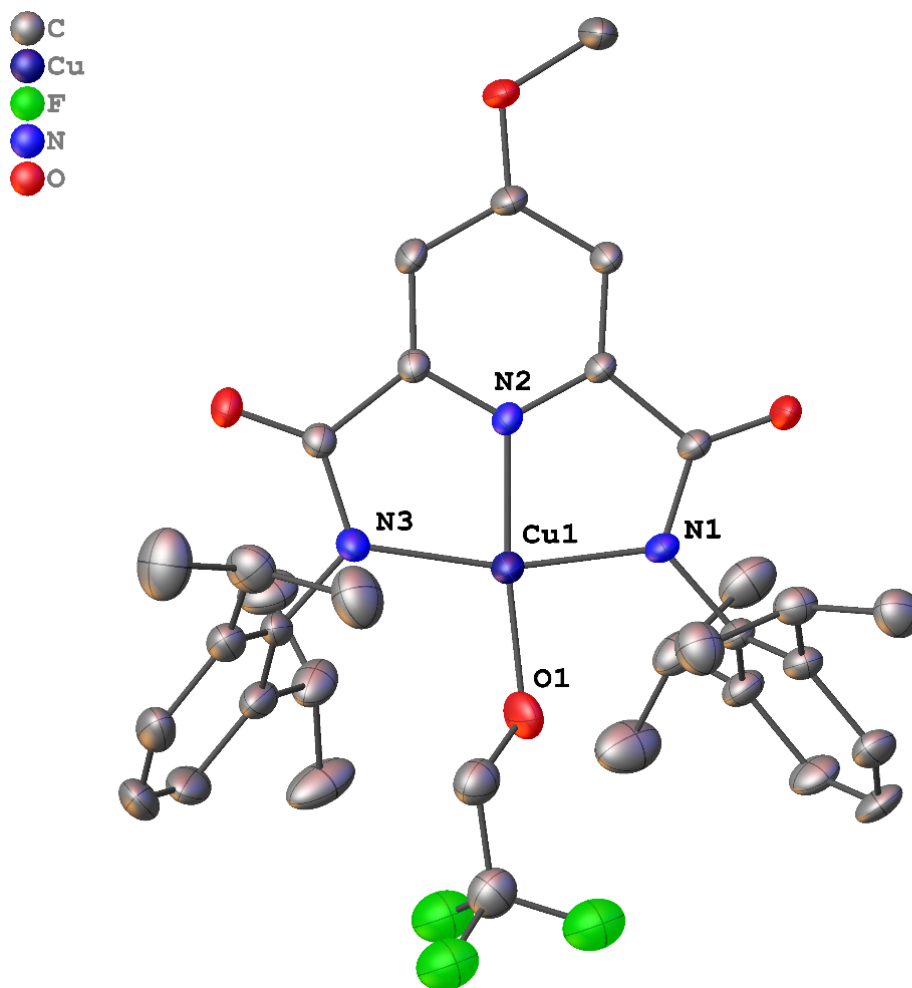

**Figure S41.** Thermal ellipsoid diagram of L<sup>OMe</sup>CuOCH<sub>2</sub>CF<sub>3</sub>, showing all nonhydrogen atoms at 50% probability level. Only one of two disordered orientations of the -OCH<sub>2</sub>CF<sub>3</sub> group is shown.



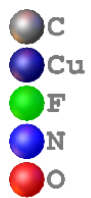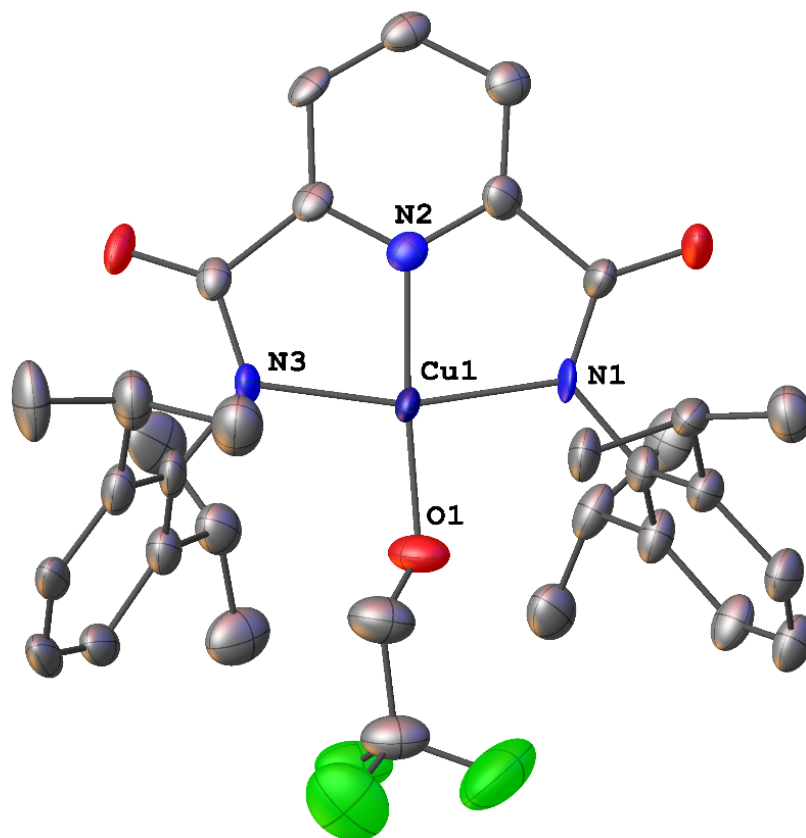

**Figure S42.** Thermal ellipsoid diagram of  $L^H\text{CuOCH}_2\text{CF}_3$ , showing all nonhydrogen atoms at 50% probability level.

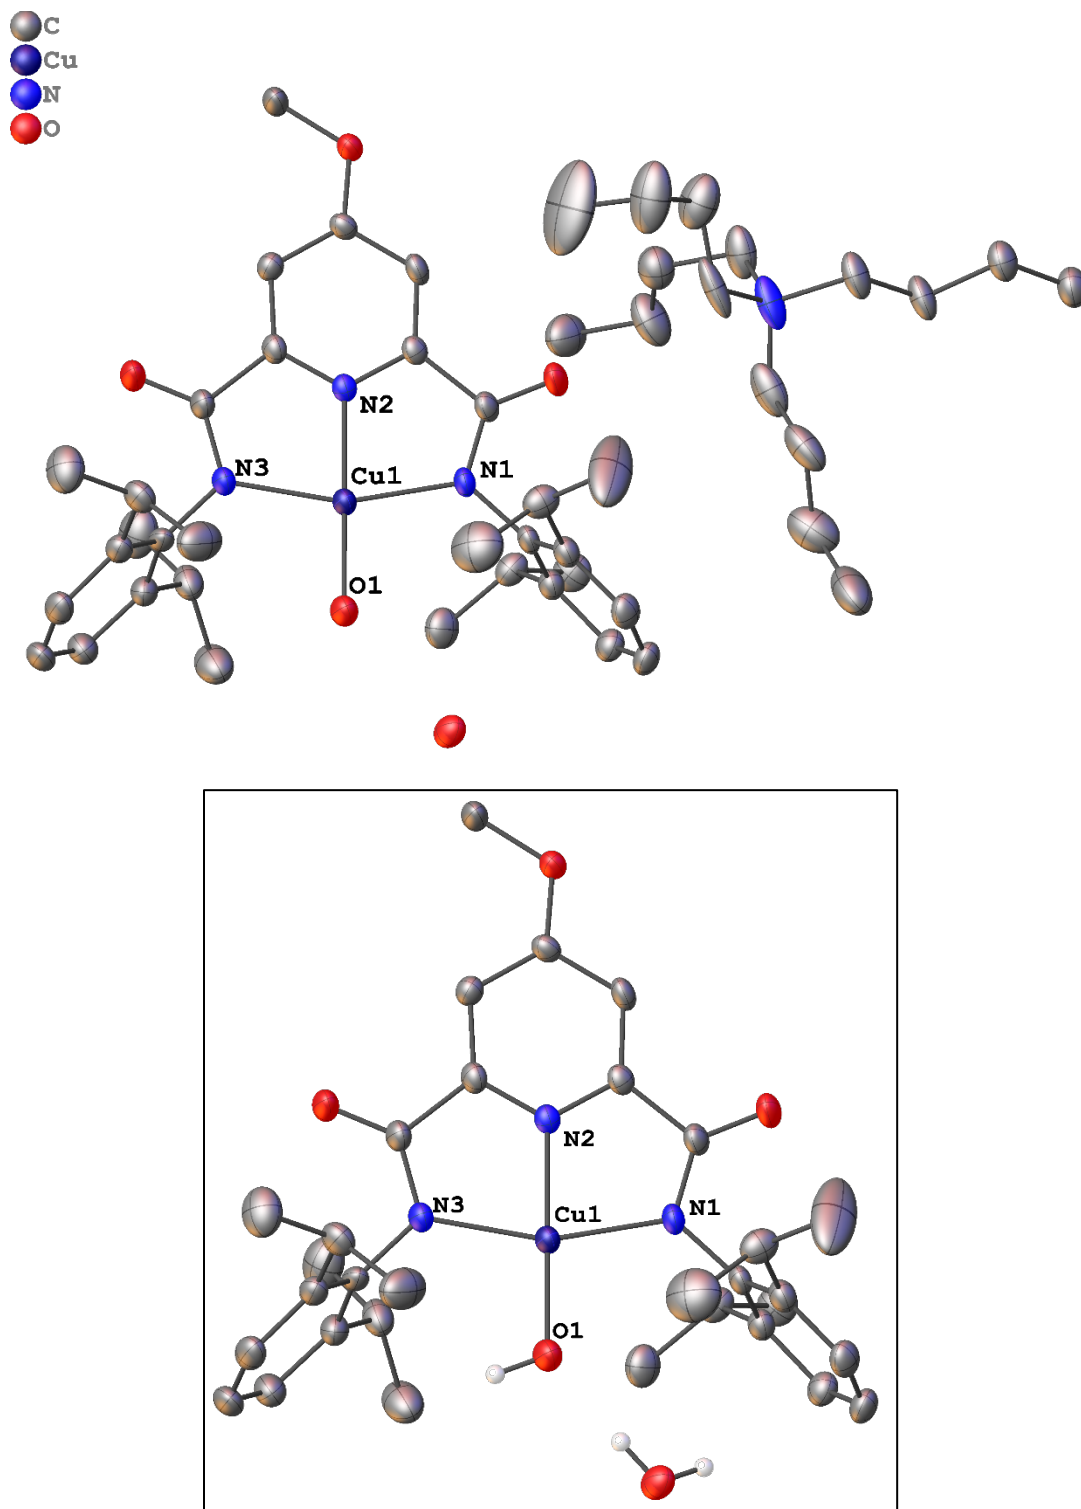

**Figure S43.** Top: Thermal ellipsoid diagram of  $[\text{NBu}_4][\text{L}^{\text{OMe}}\text{CuOH}] \cdot \text{H}_2\text{O} \cdot \text{Et}_2\text{O}$ , showing all nonhydrogen atoms at 50% probability level. One diethyl ether molecule, as well as disorder in  $\text{NBu}_4^+$  and one of the isopropyl groups of  $\text{L}^{\text{OMe}}$ , are not shown for clarity. Bottom: Hydrogen atoms of  $-\text{OH}$  and  $\text{H}_2\text{O}$  displayed to show hydrogen bonding.

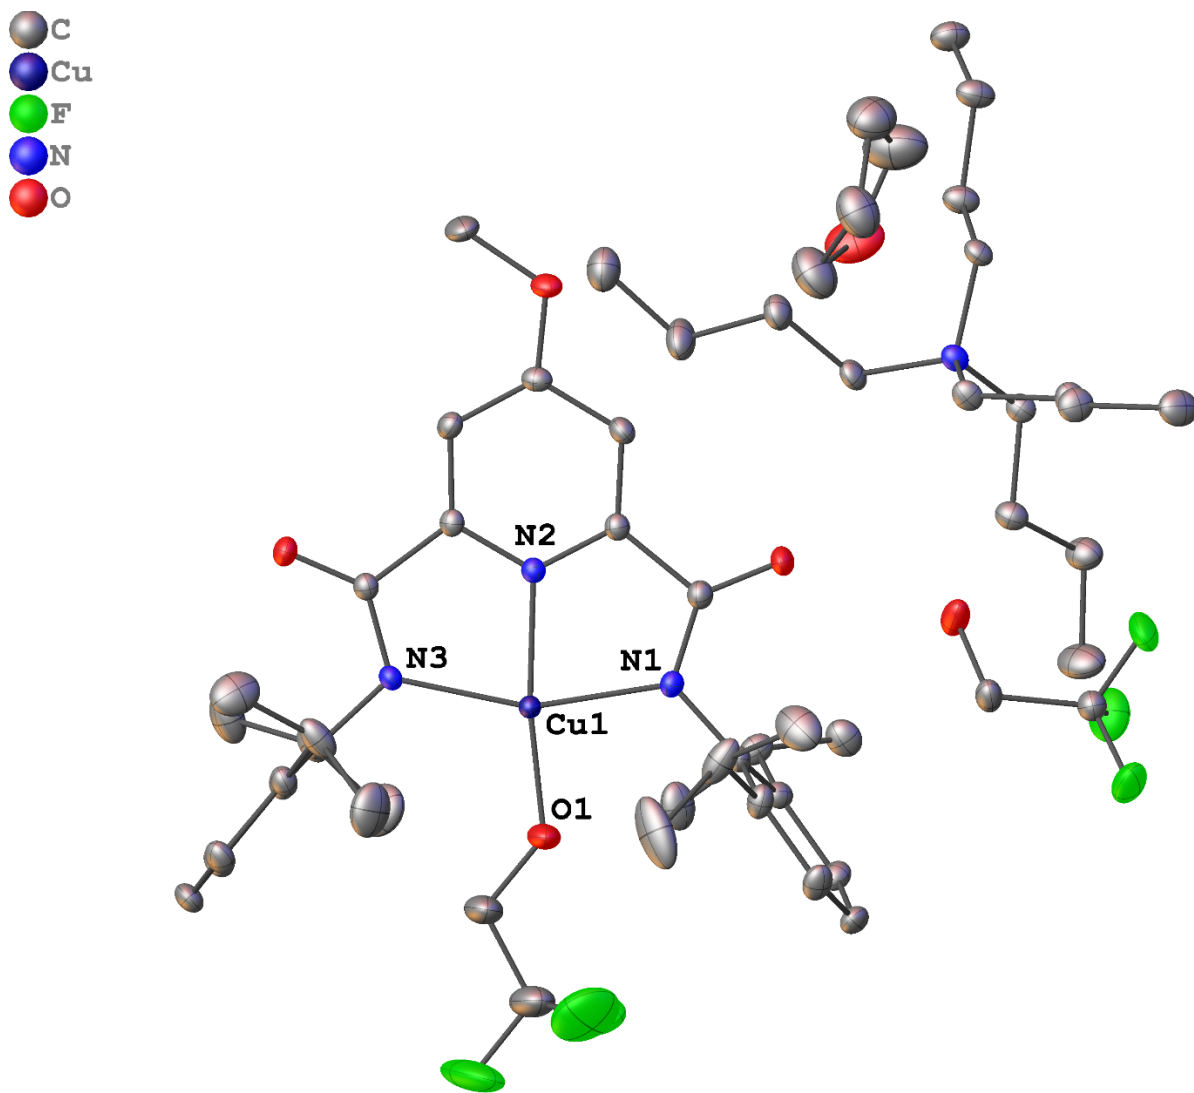

**Figure S44.** Thermal ellipsoid diagram of  $[\text{NBu}_4]\text{L}^{\text{OMe}}\text{CuOCH}_2\text{CF}_3 \cdot \text{CF}_3\text{CH}_2\text{OH} \cdot \text{THF}$ , showing all nonhydrogen atoms at 50% probability level. Only one of two disordered orientations of the  $-\text{OCH}_2\text{CF}_3$  group is shown.

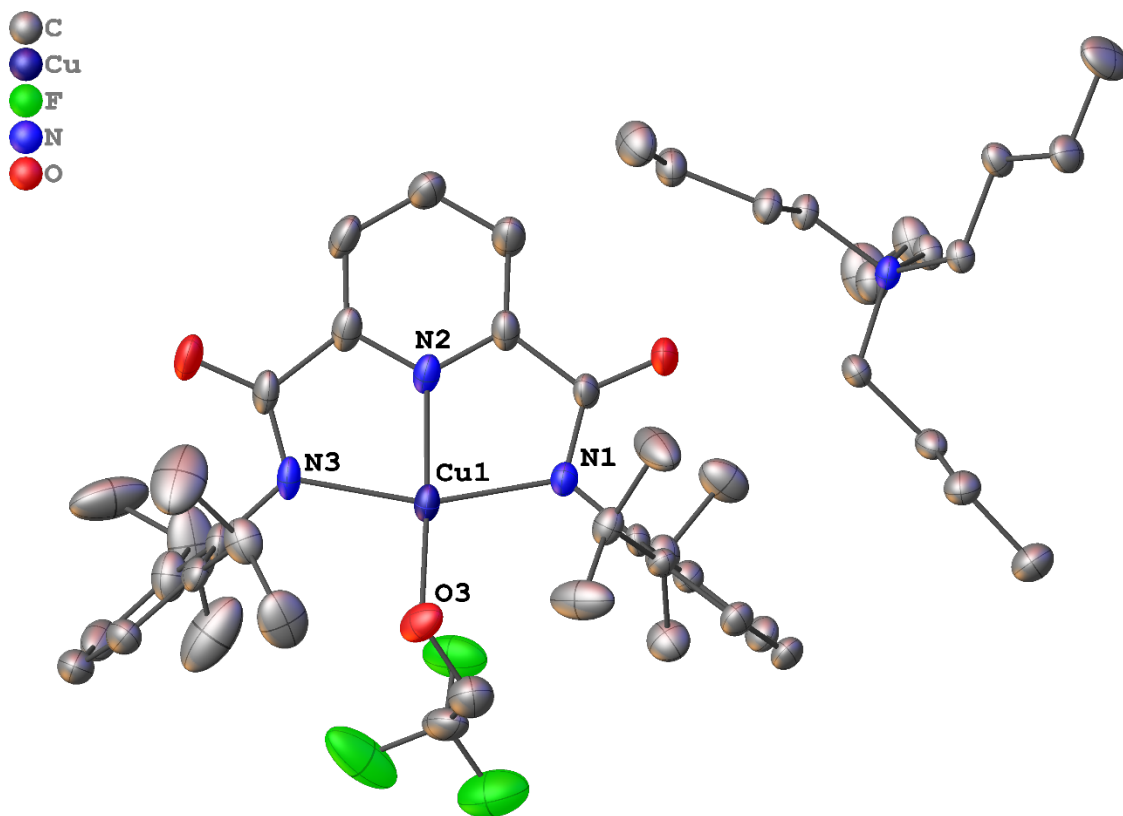

**Figure S45.** Thermal ellipsoid diagram of  $[\text{NBu}_4]\text{LCuOCH}_2\text{CF}_3 \cdot \text{C}_5\text{H}_{12}$ , showing all nonhydrogen atoms at 50% probability level. One pentane molecule has been omitted for clarity

## XI. RESONANCE RAMAN SPECTROSCOPY OF L<sup>Y</sup>CuOR

### General Comments:

Resonance Raman spectra were obtained by collecting the collimated Raman scattering using a Plano convex lenses ( $f = 10\text{cm}$ , placed at an appropriate distance) through a long-pass edge filter (Semrock). The spectra were collected by an Andor ShamrockSR-500i monochromator with a Newton 920 thermo-electrically cooled CCD detector (DU920-BU) interfaced with Solis S software. The detector was cooled to  $-90\text{ }^{\circ}\text{C}$  before collection. The spectra were obtained on frozen samples at  $77\text{ K}$  using a  $135^{\circ}$  backscattering geometry. Excitation at  $561\text{nm}$  was provided by a Cobolt Jive  $150\text{ mW}$  laser. Raman shifts were externally referenced to indene and internally referenced to solvent (THF). Each spectrum was an accumulation of 450 spectra with 4s acquisition times, resulting in 30 min collections. Spectra were baseline corrected using a multi-point correction process using SpectraGryph.<sup>17</sup>

### General preparation of L<sup>Y</sup>CuOR for Raman spectroscopy

In a glovebox, a quartz EPR tube was charged with a solution of L<sup>Y</sup>CuOR ( $Y = -\text{H}, -\text{OMe}$ ;  $R = -\text{H}, -\text{OCH}_2\text{CF}_3, \text{THF}$ ) and a small magnetic spin bar, sealed with a rubber septum, brought out, and cooled to  $-78^{\circ}\text{C}$  (acetone/dry ice). At this time, a syringe containing 1 equivalent of oxidant ( $\text{FcBAR}^{\text{F}_4}$  or  $\text{AcFcBAR}^{\text{F}_4}$  in THF) was slowly injected into the cooled tube (to layer) and allowed to equilibrate to temperature; an external magnetic rod was used to manipulate the spin bar in order to mix the solution and subsequently suspend it above the liquid. The sample was then quickly removed from the cooling bath, wiped briefly to remove acetone from the outer surface, and frozen rapidly in liquid nitrogen. After the sample was adequately frozen, the septum and spin bar were removed; samples were stored at  $77\text{ K}$  until data acquisition.

### Sample preparation rR spectrum of L<sup>OMe</sup>CuOH

The sample was prepared and spectrum acquired as described in the General Procedure (above) using 0.2 mL of [NBu<sub>4</sub>][L<sup>OMe</sup>CuOH] (10mM, THF) and FcBAR<sup>F</sup><sub>4</sub> (0.25 mL, 8 mM in THF, prepared in glovebox) (Figure S46).

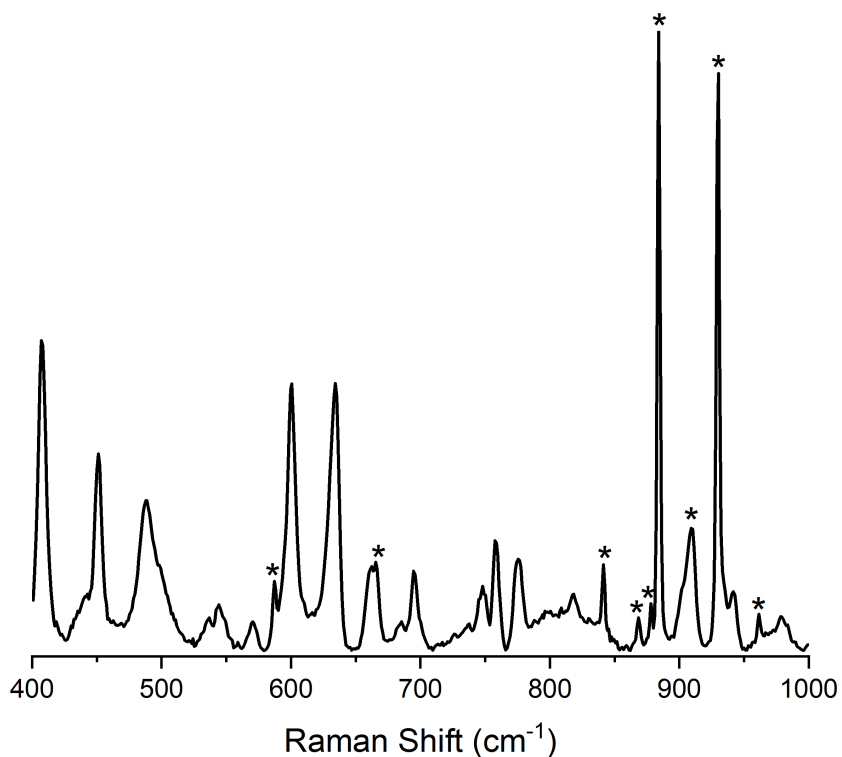

**Figure S46.** Resonance-enhanced Raman spectrum of L<sup>OMe</sup>CuOH (4.4 mM in THF). ν<sub>Cu-O</sub> is assigned at 634 cm<sup>-1</sup> (indicated) in accordance with homologous reported systems.<sup>17</sup> Asterisks indicate solvent peaks.

### Sample preparation rR Spectrum of L<sup>Y</sup>CuOCH<sub>2</sub>CF<sub>3</sub> (Y = -H, -OMe)

The sample was prepared and spectrum acquired as described in the General Procedure (above) using 0.25 mL of [NBu<sub>4</sub>][L<sup>Y</sup>CuOCH<sub>2</sub>CF<sub>3</sub>] (8 mM, THF) and 0.25 mL of oxidant solution (8 mM, THF). FcBAR<sup>F</sup><sub>4</sub> was used for Y = -OMe (Figure S47); AcFcBAR<sup>F</sup><sub>4</sub> was used for Y = -H (Figure S48).

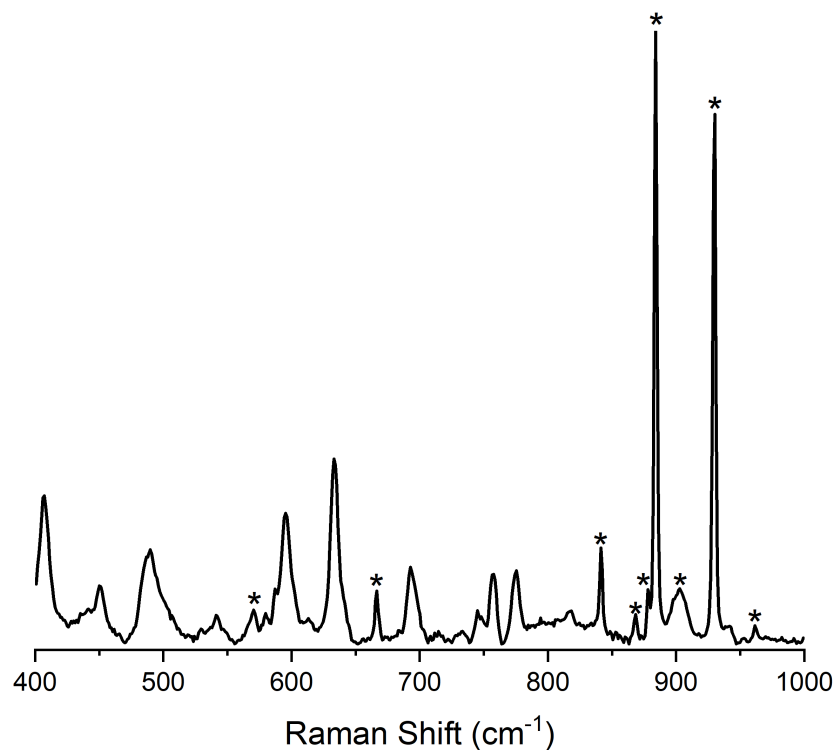

**Figure S47.** Resonance-enhanced Raman spectrum of  $L^{\text{OMe}}\text{CuOCH}_2\text{CF}_3$  (4. mM in THF).  $\nu_{\text{Cu-O}}$  is assigned at  $634\text{ cm}^{-1}$  (indicated) in accordance with homologous reported systems.<sup>18</sup> Asterisks indicate solvent peaks.

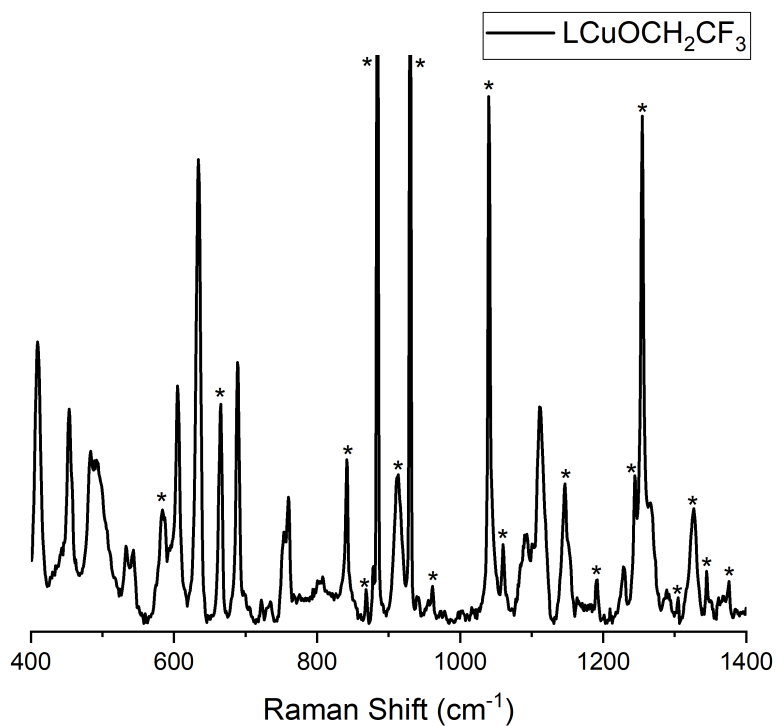

**Figure S48.** Frozen solution resonance Raman spectrum of 4 mM  $L^{\text{H}}\text{CuOCH}_2\text{CF}_3$  in THF at 77 K

using 561 nm excitation. Asterisks indicate solvent peaks.

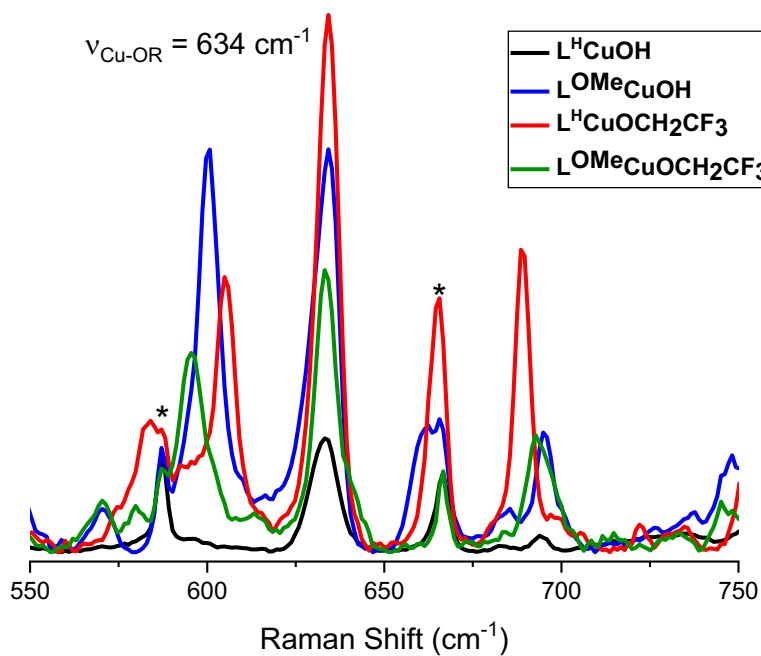

**Figure S49.** Overlay of  $[\text{CuOR}]^{2+}$  resonance Raman spectra between 550-750  $\text{cm}^{-1}$ . Signals attributed to  $\nu_{\text{Cu-OR}}$  for each complex (located at 634  $\text{cm}^{-1}$ ) are indicated. While signal clusters located around 600  $\text{cm}^{-1}$  and 690  $\text{cm}^{-1}$  appear to arise from the complexes, we have not assigned these peaks. However, we note the resemblance of these spectra to those of  $\text{TpCuOCH}_2\text{CF}_3$  (Tp = hydro-tris(pyrazolyl)borate).<sup>19</sup> Asterisks indicate solvent peaks.



## XII. DENSITY FUNCTIONAL THEORY

### Computational Details

Gas phase geometry optimizations and harmonic vibrational frequencies were performed for the singlet ground state using the mPW1PW91 functional as implemented in Gaussian 16.<sup>20,21</sup> The SDD basis set and pseudopotential were used for Cu while the remaining atoms were treated with the 6-311+G(d,p) basis set.<sup>22-24</sup> Single point energy calculations were performed for the triplet state on the singlet optimized geometry. The Raman spectra were computed using the precomputed vibrational scaling factor of 0.957, as recommended for mPW1PW91/6-311+G(d,p).<sup>25</sup> Note that we use a mixed basis set and the scaling factor for mPW1PW91/SDD is 0.950; however, we have chosen the scaling factor for the basis set used for all atoms with the exception of Cu. Time dependent DFT (TDDFT) calculations were also performed using the B98 functional with the same basis set.<sup>26,27</sup> Transition energies were computed for the first 36 singlet states. These transitions were fit to standard Gaussian curves to determine the calculated spectra using a spectral broadening factor of 0.333 eV. We also plot the UV-vis spectra with a narrower broadening of 0.1 eV to show underlying differences between the studied complexes that are hidden using the standard broadening.

### Summary of Calculated Properties

**Table S2.** Bond distances (Å) obtained by DFT (mPW1PW91) for [CuOR]<sup>2+</sup> (“Cu(III)”) species. Averaged values presented for Cu-N<sub>1</sub> and Cu-N<sub>3</sub> bonds.

| Bond                | L,    | L <sup>OMe</sup> , | L,                               | L <sup>OMe</sup> ,               |
|---------------------|-------|--------------------|----------------------------------|----------------------------------|
|                     | OH    | OH                 | OCH <sub>2</sub> CF <sub>3</sub> | OCH <sub>2</sub> CF <sub>3</sub> |
| Cu-N <sub>2</sub>   | 1.853 | 1.845              | 1.875                            | 1.866                            |
| Cu-N <sub>1,3</sub> | 1.915 | 1.916              | 1.960                            | 1.960                            |
| Cu-O <sub>1</sub>   | 1.783 | 1.783              | 1.818                            | 1.817                            |

**Table S3.** The  $\lambda_{\max}$  and oscillator strengths (f) as computed by TD-DFT (B98) for [CuOR]<sup>2+</sup> (“Cu(III)”) species.

|                       | L,<br>OH | L <sup>OMe</sup> ,<br>OH | L,<br>OCH <sub>2</sub> CF <sub>3</sub> | L <sup>OMe</sup> ,<br>OCH <sub>2</sub> CF <sub>3</sub> |
|-----------------------|----------|--------------------------|----------------------------------------|--------------------------------------------------------|
| $\lambda_{\max}$ (nm) | 546.1    | 537.1                    | 578.7                                  | 573.6                                                  |
| f                     | 0.3194   | 0.3197                   | 0.3222                                 | 0.3194                                                 |

**Table S4.** Calculated (mPW1PW91) orbital energies for [CuOR]<sup>2+</sup> (“Cu(III)”) species in eV.

|               | L,<br>OH | L <sup>OMe</sup> ,<br>OH | L,<br>OCH <sub>2</sub> CF <sub>3</sub> | L <sup>OMe</sup> ,<br>OCH <sub>2</sub> CF <sub>3</sub> |
|---------------|----------|--------------------------|----------------------------------------|--------------------------------------------------------|
| HOMO          | -6.6412  | -6.5770                  | -6.6388                                | -6.5800                                                |
| LUMO          | -3.7386  | -3.6262                  | -4.0730                                | -3.9701                                                |
| HOMO-LUMO gap | 2.90     | 2.95                     | 2.57                                   | 2.61                                                   |

**Table S5.** Calculated (mPW1PW91) energy differences between the S=0 and S=1 states for [CuOR]<sup>2+</sup> (“Cu(III)”) species in kcal/mol. Attempts to converge the broken symmetry singlet solution converged to the closed shell case for all four complexes.

|                                                     | Singlet-Triplet<br>Splitting (kcal/mol) |
|-----------------------------------------------------|-----------------------------------------|
| L <sup>H</sup> CuH                                  | 32.25                                   |
| L <sup>OMe</sup> CuH                                | 33.43                                   |
| L <sup>H</sup> CuOCH <sub>2</sub> CF <sub>3</sub>   | 20.59                                   |
| L <sup>OMe</sup> CuOCH <sub>2</sub> CF <sub>3</sub> | 21.68                                   |

**Table S6.** CM5 atomic charges calculated at the mPW1PW91/6-311+G(d,p)/SDD level of theory.

|             | L,<br>OH | L <sup>OMe</sup> ,<br>OH | L,<br>OCH <sub>2</sub> CF <sub>3</sub> | L <sup>OMe</sup> ,<br>OCH <sub>2</sub> CF <sub>3</sub> |
|-------------|----------|--------------------------|----------------------------------------|--------------------------------------------------------|
| Cu          | 0.908    | 0.910                    | 0.866                                  | 0.870                                                  |
| O           | -0.614   | -0.618                   | -0.410                                 | -0.413                                                 |
| N1,3 (avg.) | -0.420   | -0.419                   | -0.412                                 | -0.411                                                 |
| N2          | -0.377   | -0.394                   | -0.368                                 | -0.385                                                 |

## UV-visible Spectra

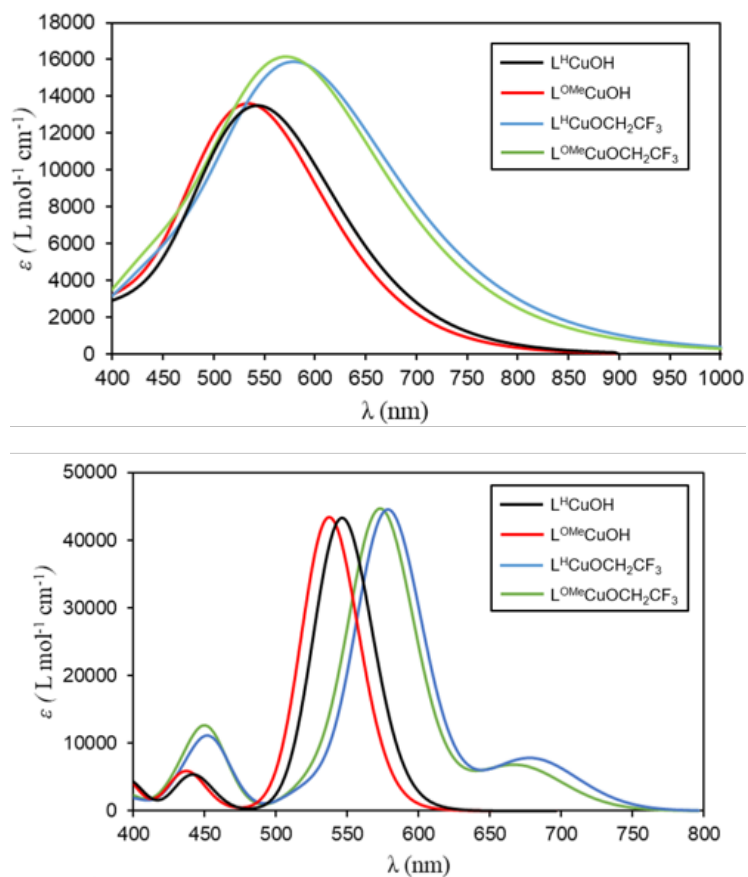

**Figure S50.** UV-Vis spectra computed at the B98/6-311+G(d,p)/SDD level of theory with a spectra broadening value of 0.333 eV (top) and 0.1 eV (bottom).

**Table S7.** Detailed description of the four lowest excited states for the L<sup>H</sup>CuOH structure computed at the TD-B98/6-311+G(d,p)/SDD level of theory.

| Excited State | Excitation Energy (nm) | Oscillator Strength | Transition Description | Coefficient |
|---------------|------------------------|---------------------|------------------------|-------------|
| 1             | 599.24                 | 0.0008              | HOMO-7 to LUMO         | 0.20793     |
|               |                        |                     | HOMO-5 to LUMO         | -0.18224    |
|               |                        |                     | HOMO-4 to LUMO         | 0.53601     |
|               |                        |                     | HOMO-1 to LUMO         | 0.34719     |
| 2             | 588.23                 | 0.002               | HOMO-7 to LUMO         | 0.14969     |
|               |                        |                     | HOMO-5 to LUMO         | -0.26616    |
|               |                        |                     | HOMO-4 to LUMO         | -0.43599    |
|               |                        |                     | HOMO-1 to LUMO         | 0.44277     |
| 3             | 564.37                 | 0.0013              | HOMO-7 to LUMO         | -0.27801    |
|               |                        |                     | HOMO-5 to LUMO         | 0.44035     |
|               |                        |                     | HOMO-2 to LUMO         | 0.20052     |
|               |                        |                     | HOMO-1 to LUMO         | 0.42545     |
| 4             | 546.09                 | 0.3194              | HOMO to LUMO           | 0.69613     |

**Table S8.** Detailed description of the four lowest excited states for the L<sup>OMe</sup>CuOH structure computed at the TD-B98/6-311+G(d,p)/SDD level of theory.

| Excited State | Excitation Energy (nm) | Oscillator Strength | Transition Description | Coefficient |
|---------------|------------------------|---------------------|------------------------|-------------|
| 1             | 587.8                  | 0.0011              | HOMO-7 to LUMO         | 0.24409     |
|               |                        |                     | HOMO-5 to LUMO         | -0.19029    |
|               |                        |                     | HOMO-4 to LUMO         | 0.54076     |
|               |                        |                     | HOMO-1 to LUMO         | -0.28872    |
| 2             | 580.8                  | 0.0012              | HOMO-7 to LUMO         | -0.24126    |
|               |                        |                     | HOMO-5 to LUMO         | 0.35314     |
|               |                        |                     | HOMO-4 to LUMO         | 0.40676     |
|               |                        |                     | HOMO-2 to LUMO         | -0.13919    |
|               |                        |                     | HOMO-1 to LUMO         | 0.33330     |
| 3             | 554.8                  | 0.0029              | HOMO-7 to LUMO         | 0.23633     |
|               |                        |                     | HOMO-5 to LUMO         | -0.33029    |
|               |                        |                     | HOMO-2 to LUMO         | 0.15687     |
|               |                        |                     | HOMO-1 to LUMO         | 0.55030     |
| 4             | 537.1                  | 0.3197              | HOMO to LUMO           | 0.69438     |

**Table S9.** Detailed description of the four lowest excited states for the L<sup>H</sup>CuOCH<sub>2</sub>CF<sub>3</sub> structure computed at the TD-B98/6-311+G(d,p)/SDD level of theory.

| <b>Excited State</b> | <b>Excitation Energy (nm)</b> | <b>Oscillator Strength</b> | <b>Transition Description</b> | <b>Coefficient</b> |
|----------------------|-------------------------------|----------------------------|-------------------------------|--------------------|
| 1                    | 679.3                         | 0.0555                     | HOMO-4 to LUMO                | 0.55587            |
|                      |                               |                            | HOMO-3 to LUMO                | 0.11181            |
|                      |                               |                            | HOMO to LUMO                  | -0.38937           |
| 2                    | 678.0                         | 0.0012                     | HOMO-7 to LUMO                | 0.20995            |
|                      |                               |                            | HOMO-5 to LUMO                | 0.44772            |
|                      |                               |                            | HOMO-3 to LUMO                | 0.20929            |
|                      |                               |                            | HOMO-2 to LUMO                | -0.12367           |
|                      |                               |                            | HOMO-1 to LUMO                | 0.42423            |
| 3                    | 627.0                         | 0.0049                     | HOMO-7 to LUMO                | -0.13735           |
|                      |                               |                            | HOMO-5 to LUMO                | -0.3311            |
|                      |                               |                            | HOMO-3 to LUMO                | -0.18246           |
|                      |                               |                            | HOMO-2 to LUMO                | 0.11929            |
|                      |                               |                            | HOMO-1 to LUMO                | 0.56233            |
| 4                    | 578.7                         | 0.3222                     | HOMO-4 to LUMO                | 0.36126            |
|                      |                               |                            | HOMO-3 to LUMO                | 0.11697            |
|                      |                               |                            | HOMO to LUMO                  | 0.56716            |

**Table S10.** Detailed description of the four lowest excited states for the L<sup>OMe</sup>CuOCH<sub>2</sub>CF<sub>3</sub> structure computed at the TD-B98/6-311+G(d,p)/SDD level of theory.

| <b>Excited State</b> | <b>Excitation Energy (nm)</b> | <b>Oscillator Strength</b> | <b>Transition Description</b> | <b>Coefficient</b> |
|----------------------|-------------------------------|----------------------------|-------------------------------|--------------------|
| 1                    | 674.9                         | 0.0199                     | HOMO-7 to LUMO                | 0.13140            |
|                      |                               |                            | HOMO-6 to LUMO                | -0.24166           |
|                      |                               |                            | HOMO-5 to LUMO                | 0.36052            |
|                      |                               |                            | HOMO-4 to LUMO                | -0.34913           |
|                      |                               |                            | HOMO-3 to LUMO                | 0.12937            |
|                      |                               |                            | HOMO-1 to LUMO                | 0.29326            |
|                      |                               |                            | HOMO to LUMO                  | 0.21375            |
| 2                    | 665.4                         | 0.0299                     | HOMO-5 to LUMO                | 0.25672            |
|                      |                               |                            | HOMO-4 to LUMO                | 0.45845            |
|                      |                               |                            | HOMO-3 to LUMO                | 0.20862            |
|                      |                               |                            | HOMO-2 to LUMO                | -0.10959           |
|                      |                               |                            | HOMO-1 to LUMO                | 0.24861            |
|                      |                               |                            | HOMO to LUMO                  | -0.29781           |
| 3                    | 614.4                         | 0.0059                     | HOMO-6 to LUMO                | 0.11958            |
|                      |                               |                            | HOMO-5 to LUMO                | -0.27979           |
|                      |                               |                            | HOMO-3 to LUMO                | -0.17925           |
|                      |                               |                            | HOMO-2 to LUMO                | 0.12584            |
|                      |                               |                            | HOMO-1 to LUMO                | 0.59000            |
| 4                    | 573.6                         | 0.3194                     | HOMO-6 to LUMO                | -0.12255           |
|                      |                               |                            | HOMO-4 to LUMO                | 0.35380            |
|                      |                               |                            | HOMO to LUMO                  | 0.57535            |

**Table S11.** The 36 lowest energy singlet states for L<sup>H</sup>CuOH structure computed at the TD-B98/6-311+G(d,p)/SDD level of theory.

| Excited State | Excitation Energy (nm) | Oscillator Strength |
|---------------|------------------------|---------------------|
| 1             | 599.2                  | 0.0008              |
| 2             | 588.2                  | 0.0020              |
| 3             | 564.4                  | 0.0013              |
| 4             | 546.1                  | 0.3194              |
| 5             | 508.3                  | 0.0038              |
| 6             | 461.9                  | 0.0001              |
| 7             | 441.6                  | 0.0401              |
| 8             | 413.3                  | 0.0000              |
| 9             | 395.8                  | 0.0341              |
| 10            | 387.7                  | 0.0002              |
| 11            | 362.2                  | 0.0000              |
| 12            | 360.2                  | 0.0007              |
| 13            | 355.4                  | 0.0037              |
| 14            | 352.9                  | 0.0154              |
| 15            | 343.7                  | 0.0000              |
| 16            | 340.9                  | 0.0001              |
| 17            | 334.5                  | 0.0286              |
| 18            | 333.3                  | 0.0000              |
| 19            | 325.2                  | 0.0018              |
| 20            | 321.5                  | 0.0026              |
| 21            | 317.6                  | 0.0005              |
| 22            | 311.0                  | 0.0000              |
| 23            | 308.5                  | 0.0000              |
| 24            | 305.1                  | 0.0000              |
| 25            | 300.2                  | 0.0645              |
| 26            | 294.2                  | 0.0000              |
| 27            | 291.4                  | 0.0212              |
| 28            | 285.0                  | 0.0187              |
| 29            | 284.8                  | 0.0000              |
| 30            | 281.1                  | 0.0093              |
| 31            | 279.3                  | 0.0000              |
| 32            | 275.6                  | 0.0001              |
| 33            | 273.9                  | 0.0000              |
| 34            | 270.1                  | 0.0071              |
| 35            | 267.1                  | 0.0000              |
| 36            | 264.6                  | 0.0006              |

**Table S12.** The 36 lowest energy singlet states for L<sup>OMe</sup>CuOH structure computed at the TD-B98/6-311+G(d,p)/SDD level of theory.

| Excited State | Excitation Energy (nm) | Oscillator Strength |
|---------------|------------------------|---------------------|
| 1             | 587.8                  | 0.0011              |
| 2             | 580.8                  | 0.0012              |
| 3             | 554.8                  | 0.0029              |
| 4             | 537.1                  | 0.3197              |
| 5             | 499.7                  | 0.0039              |
| 6             | 467.4                  | 0.0006              |
| 7             | 436.9                  | 0.0438              |
| 8             | 392.1                  | 0.0382              |
| 9             | 372.9                  | 0.0000              |
| 10            | 353.7                  | 0.0001              |
| 11            | 352.6                  | 0.0016              |
| 12            | 350.4                  | 0.0140              |
| 13            | 332.3                  | 0.0284              |
| 14            | 330.5                  | 0.0001              |
| 15            | 325.0                  | 0.0007              |
| 16            | 322.6                  | 0.0075              |
| 17            | 320.3                  | 0.0007              |
| 18            | 319.4                  | 0.0000              |
| 19            | 316.5                  | 0.0003              |
| 20            | 314.3                  | 0.0005              |
| 21            | 309.9                  | 0.0001              |
| 22            | 303.3                  | 0.0002              |
| 23            | 302.7                  | 0.0050              |
| 24            | 301.3                  | 0.0004              |
| 25            | 299.2                  | 0.0003              |
| 26            | 296.5                  | 0.0545              |
| 27            | 289.8                  | 0.0000              |
| 28            | 288.7                  | 0.0371              |
| 29            | 277.9                  | 0.0116              |
| 30            | 276.7                  | 0.0000              |
| 31            | 273.5                  | 0.0001              |
| 32            | 270.2                  | 0.0150              |
| 33            | 268.2                  | 0.0000              |
| 34            | 267.0                  | 0.0172              |
| 35            | 263.2                  | 0.0082              |
| 36            | 262.9                  | 0.0000              |



**Table S13.** The 36 lowest energy singlet states for L<sup>H</sup>CuOCH<sub>2</sub>CF<sub>3</sub> structure computed at the TD-B98/6-311+G(d,p)/SDD level of theory.

| <b>Excited State</b> | <b>Excitation Energy (nm)</b> | <b>Oscillator Strength</b> |
|----------------------|-------------------------------|----------------------------|
| 1                    | 679.3                         | 0.0555                     |
| 2                    | 678.0                         | 0.0012                     |
| 3                    | 627.0                         | 0.0049                     |
| 4                    | 578.7                         | 0.3222                     |
| 5                    | 559.7                         | 0.0093                     |
| 6                    | 524.0                         | 0.0241                     |
| 7                    | 454.1                         | 0.0743                     |
| 8                    | 433.4                         | 0.0242                     |
| 9                    | 414.7                         | 0.0007                     |
| 10                   | 397.1                         | 0.0136                     |
| 11                   | 373.1                         | 0.0021                     |
| 12                   | 364.2                         | 0.0157                     |
| 13                   | 359.5                         | 0.0027                     |
| 14                   | 352.2                         | 0.0017                     |
| 15                   | 349.1                         | 0.0001                     |
| 16                   | 348.1                         | 0.0008                     |
| 17                   | 343.5                         | 0.0034                     |
| 18                   | 336.8                         | 0.0001                     |
| 19                   | 330.0                         | 0.0017                     |
| 20                   | 328.4                         | 0.0005                     |
| 21                   | 323.9                         | 0.0046                     |
| 22                   | 311.7                         | 0.0043                     |
| 23                   | 311.2                         | 0.0020                     |
| 24                   | 309.4                         | 0.0001                     |
| 25                   | 307.0                         | 0.0252                     |
| 26                   | 304.8                         | 0.0025                     |
| 27                   | 303.2                         | 0.0208                     |
| 28                   | 298.3                         | 0.0023                     |
| 29                   | 297.2                         | 0.0037                     |
| 30                   | 295.9                         | 0.0029                     |
| 31                   | 293.3                         | 0.0007                     |
| 32                   | 291.4                         | 0.0840                     |
| 33                   | 289.1                         | 0.0229                     |
| 34                   | 284.5                         | 0.0026                     |
| 35                   | 280.0                         | 0.0353                     |
| 36                   | 278.4                         | 0.0103                     |

**Table S14.** The 36 lowest energy singlet states for L<sup>OMe</sup>CuOCH<sub>2</sub>CF<sub>3</sub> structure computed at the TD-B98/6-311+G(d,p)/SDD level of theory.

| <b>Excited State</b> | <b>Excitation Energy (nm)</b> | <b>Oscillator Strength</b> |
|----------------------|-------------------------------|----------------------------|
| 1                    | 674.9                         | 0.0199                     |
| 2                    | 665.4                         | 0.0299                     |
| 3                    | 614.4                         | 0.0059                     |
| 4                    | 573.6                         | 0.3194                     |
| 5                    | 552.0                         | 0.0143                     |
| 6                    | 525.8                         | 0.0269                     |
| 7                    | 451.8                         | 0.0855                     |
| 8                    | 430.9                         | 0.0255                     |
| 9                    | 394.3                         | 0.0184                     |
| 10                   | 374.3                         | 0.0029                     |
| 11                   | 359.3                         | 0.0098                     |
| 12                   | 353.6                         | 0.0043                     |
| 13                   | 352.2                         | 0.0002                     |
| 14                   | 348.0                         | 0.0003                     |
| 15                   | 342.1                         | 0.0015                     |
| 16                   | 330.9                         | 0.0003                     |
| 17                   | 323.3                         | 0.0021                     |
| 18                   | 320.6                         | 0.0002                     |
| 19                   | 317.9                         | 0.0001                     |
| 20                   | 315.7                         | 0.0041                     |
| 21                   | 309.5                         | 0.0027                     |
| 22                   | 306.9                         | 0.0006                     |
| 23                   | 306.6                         | 0.0002                     |
| 24                   | 304.2                         | 0.0283                     |
| 25                   | 301.3                         | 0.0005                     |
| 26                   | 299.4                         | 0.0474                     |
| 27                   | 296.2                         | 0.0056                     |
| 28                   | 295.3                         | 0.0028                     |
| 29                   | 292.3                         | 0.0005                     |
| 30                   | 291.1                         | 0.0006                     |
| 31                   | 289.5                         | 0.0743                     |
| 32                   | 286.5                         | 0.0059                     |
| 33                   | 280.0                         | 0.0078                     |
| 34                   | 277.9                         | 0.0838                     |
| 35                   | 275.5                         | 0.0006                     |
| 36                   | 275.1                         | 0.0158                     |

## DFT Frontier Molecular Orbitals

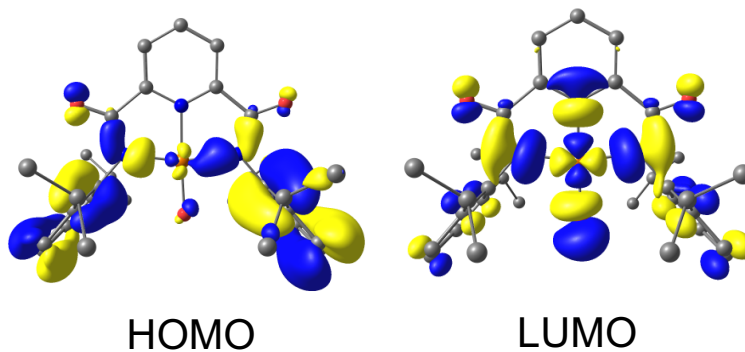

**Figure S51.** Selected molecule orbitals from the  $L^H\text{CuOH}$  structure computed at the B98/6-311+G(d,p)/SDD level of theory. Orbitals are plotted with an isovalue of 0.03 a.u. Hydrogen atoms, with the exception of the OH group, are excluded for clarity.

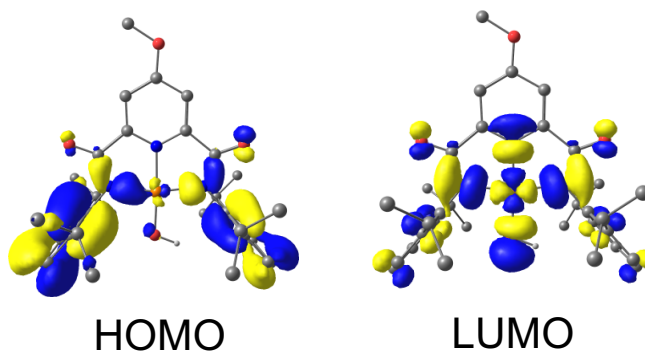

**Figure S52.** Selected molecule orbitals from the  $L^{\text{OMe}}\text{CuOH}$  structure computed at the B98/6-311+G(d,p)/SDD level of theory. Orbitals are plotted with an isovalue of 0.03 a.u. Hydrogen atoms, with the exception of the OH group, are excluded for clarity. C in grey, Cu in orange, O in red, N in blue, and H in white.

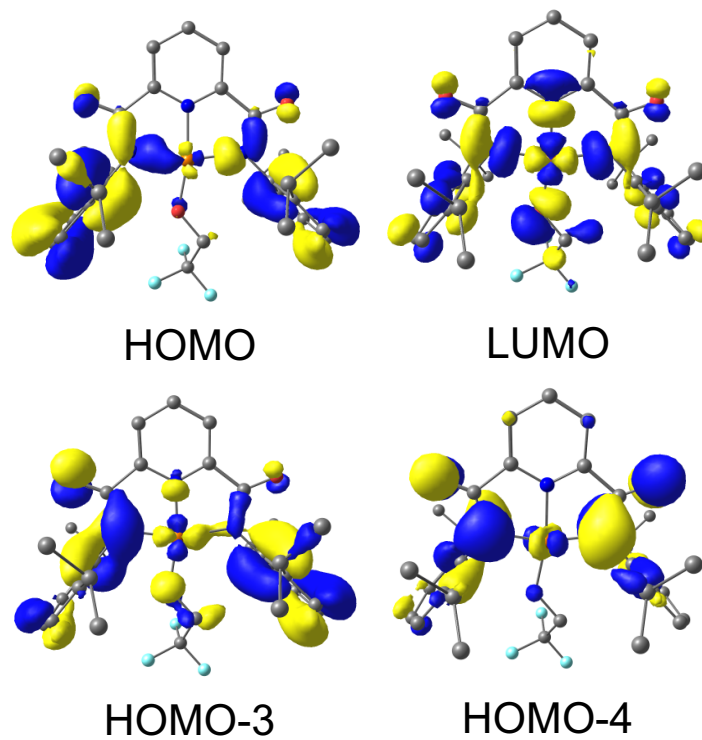

**Figure S53.** Selected molecule orbitals from the  $L^H CuOCH_2CF_3$  structure computed at the B98/6-311+G(d,p)/SDD level of theory. Orbitals are plotted with an isovalue of 0.03 a.u. Hydrogen atoms are excluded for clarity. C in grey, Cu in orange, O in red, N in blue, and F in cyan.

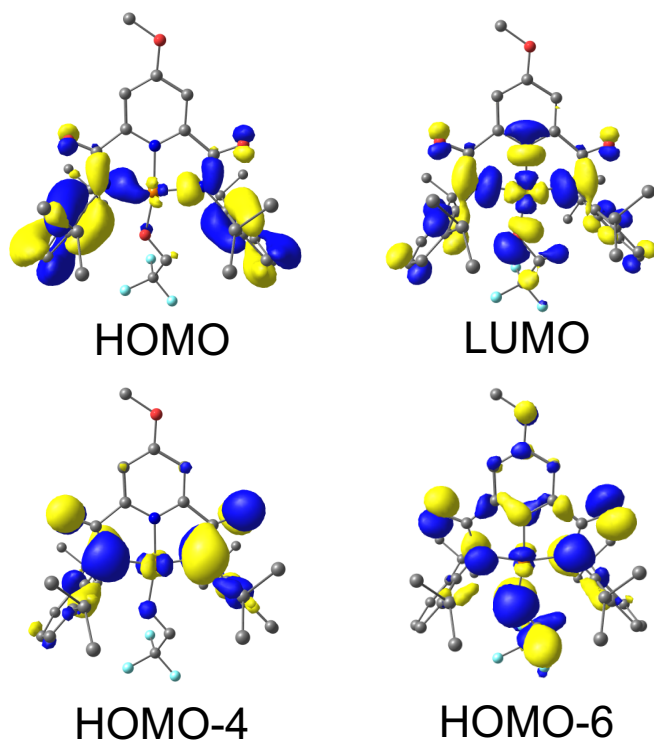

**Figure S54.** Selected molecule orbitals from the  $L^{\text{OMe}}\text{CuOCH}_2\text{CF}_3$  structure computed at the B98/6-311+G(d,p)/SDD level of theory. Orbitals are plotted with an isovalue of 0.03 a.u. Hydrogen atoms are excluded for clarity. C in grey, Cu in orange, O in red, N in blue, and F in cyan.

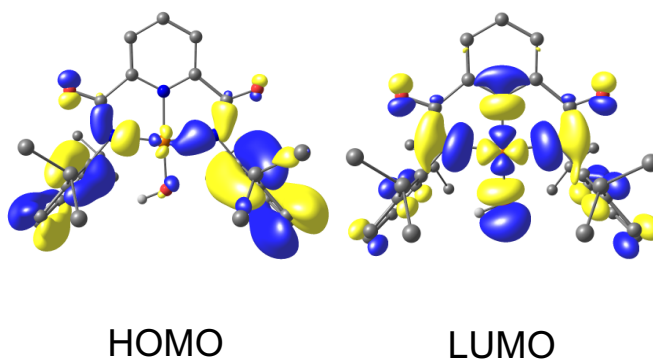

**Figure S55.** Selected molecule orbitals from the  $L^{\text{H}}\text{CuOH}$  structure computed at the *m*PWPW91/6-311+G(d,p)/SDD level of theory. Orbitals are plotted with an isovalue of 0.03 a.u. Hydrogen atoms, with the exception of the OH group, are excluded for clarity.

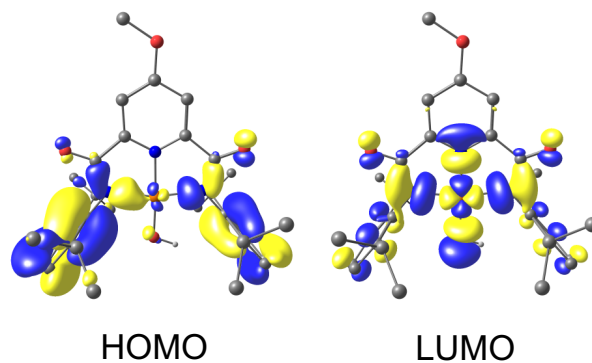

**Figure S56.** Selected molecule orbitals from the  $L^{\text{OMe}}\text{CuOH}$  structure computed at the  $m\text{PWPW91}/6\text{-}311+\text{G}(\text{d},\text{p})/\text{SDD}$  level of theory. Orbitals are plotted with an isovalue of 0.03 a.u. Hydrogen atoms, with the exception of the OH group, are excluded for clarity. C in grey, Cu in orange, O in red, N in blue, and H in white.

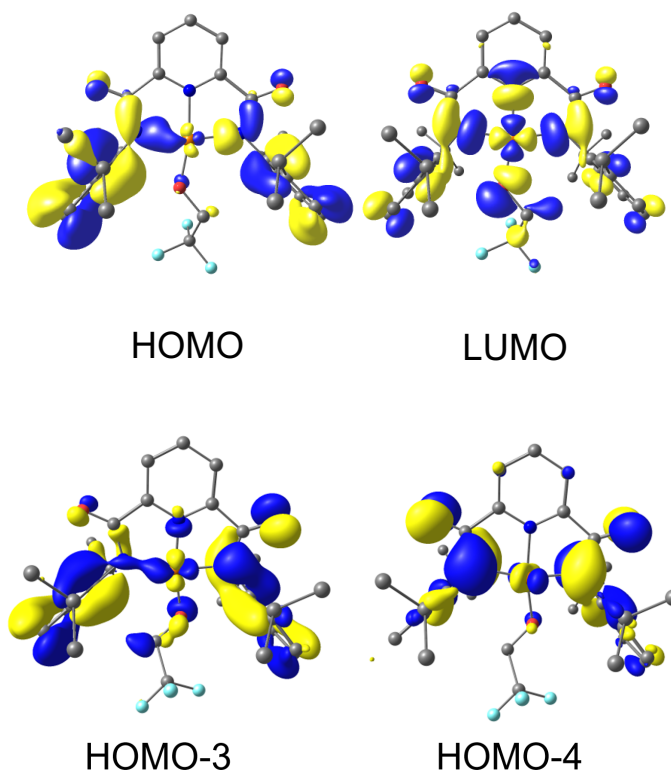

**Figure S57.** Selected molecule orbitals from the  $L^{\text{H}}\text{CuOCH}_2\text{CF}_3$  structure computed at the  $m\text{PWPW91}/6\text{-}311+\text{G}(\text{d},\text{p})/\text{SDD}$  level of theory. Orbitals are plotted with an isovalue of 0.03 a.u. Hydrogen atoms are excluded for clarity. C in grey, Cu in orange, O in red, N in blue, and F in cyan.

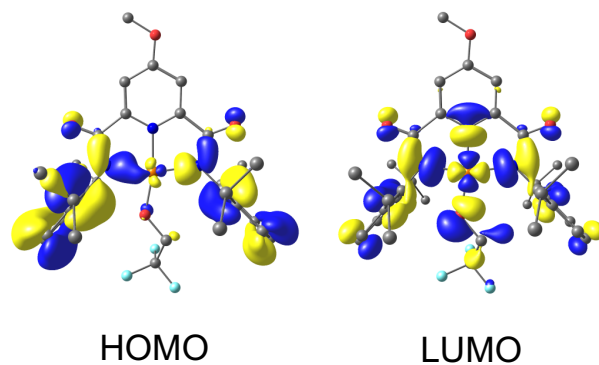

**Figure S58.** Selected molecule orbitals from the  $L^{\text{OMe}}\text{CuOCH}_2\text{CF}_3$  structure computed at the  $m\text{PWPW91}/6\text{-}311+\text{G}(\text{d},\text{p})/\text{SDD}$  level of theory. Orbitals are plotted with an isovalue of 0.03 a.u. Hydrogen atoms are excluded for clarity. C in grey, Cu in orange, O in red, N in blue, and F in cyan.

### DFT Raman Spectra

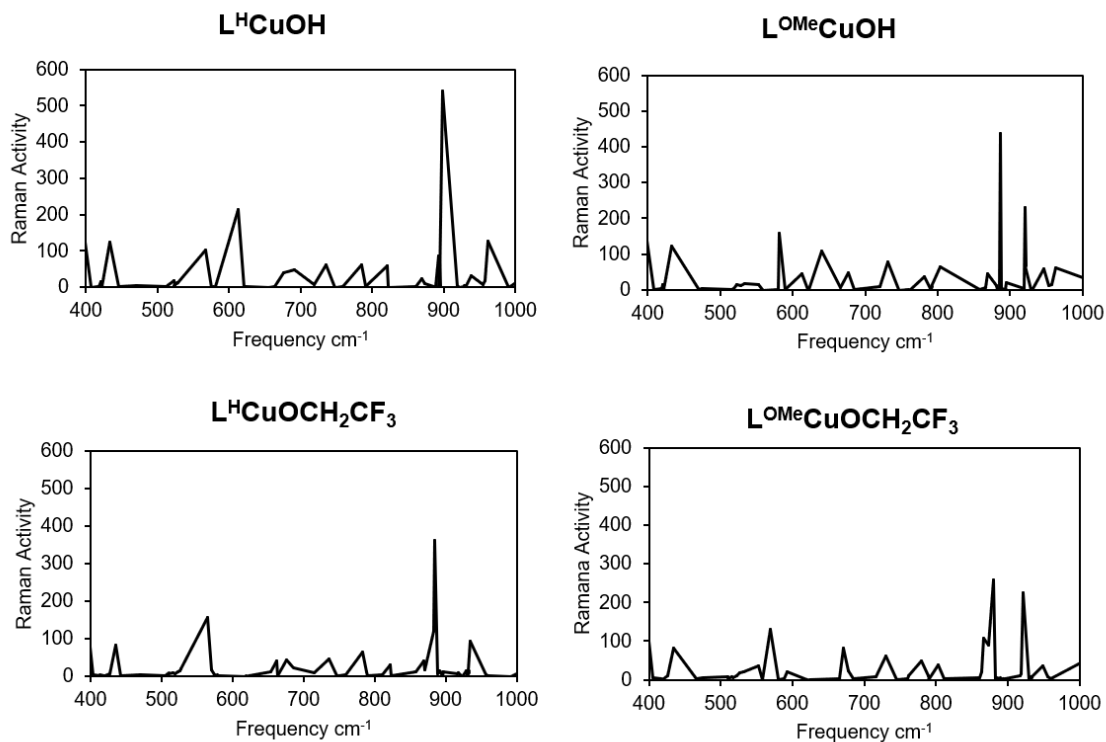

**Figure S59.** Raman Spectra obtained at  $\text{MPWPW01}/6\text{-}311+\text{G}(\text{d},\text{p})/\text{SDD}$  level of theory. Scaling factor for frequencies is set at 0.957.

Table S15. Vibrational frequencies ( $\text{cm}^{-1}$ ) in the region of interest with non-zero Raman activities. Multiple modes contain contributions from Cu-OR stretches. Additionally modes with Cu-N motions are also observed. <sup>a</sup>Assigned as  $\nu_{\text{Cu-OR}}$ . <sup>b</sup>Assigned as  $\nu_{\text{Cu-N}}$ .

| <b>Complex</b>                                      | <b>Frequency <math>\text{cm}^{-1}</math> (scaled)</b> | <b>Raman Activity (<math>\text{Å}^4/\text{a.u}</math>)</b> |
|-----------------------------------------------------|-------------------------------------------------------|------------------------------------------------------------|
| L <sup>H</sup> CuOH                                 | 613.3 <sup>a</sup>                                    | 214.6                                                      |
|                                                     | 676.5 <sup>b</sup>                                    | 40.2                                                       |
|                                                     | 691.1 <sup>b</sup>                                    | 47.2                                                       |
|                                                     | 898.5 <sup>b</sup>                                    | 540.0                                                      |
|                                                     | 259.2 <sup>b</sup>                                    | 174.6                                                      |
| L <sup>OMe</sup> CuOH                               | 392.8 <sup>b</sup>                                    | 217.1                                                      |
|                                                     | 432.7 <sup>b</sup>                                    | 122.7                                                      |
|                                                     | 581.44 <sup>a</sup>                                   | 159.4                                                      |
|                                                     | 612.2 <sup>a</sup>                                    | 44.1                                                       |
|                                                     | 639.6 <sup>a</sup>                                    | 109.3                                                      |
|                                                     | 677.2 <sup>a</sup>                                    | 47.0                                                       |
|                                                     | 886.3 <sup>b</sup>                                    | 438.7                                                      |
| L <sup>H</sup> CuOCH <sub>2</sub> CF <sub>3</sub>   | 516.5 <sup>a</sup>                                    | 10.7                                                       |
|                                                     | 564.5 <sup>b</sup>                                    | 155.4                                                      |
|                                                     | 569.5 <sup>a</sup>                                    | 18.6                                                       |
|                                                     | 662.3 <sup>a</sup>                                    | 41.9                                                       |
|                                                     | 685.3 <sup>a</sup>                                    | 23.7                                                       |
|                                                     | 885.1 <sup>b</sup>                                    | 360.9                                                      |
|                                                     | 1060.2 <sup>b</sup>                                   | 61.5                                                       |
| L <sup>OMe</sup> CuOCH <sub>2</sub> CF <sub>3</sub> | 393.9 <sup>a</sup>                                    | 195                                                        |
|                                                     | 509.5 <sup>a</sup>                                    | 9.2                                                        |
|                                                     | 510.6 <sup>a</sup>                                    | 3.4                                                        |
|                                                     | 515.9 <sup>a</sup>                                    | 7.1                                                        |
|                                                     | 568.6 <sup>a</sup>                                    | 129.6                                                      |
|                                                     | 670.9 <sup>b</sup>                                    | 83.0                                                       |
|                                                     | 880.1 <sup>b</sup>                                    | 258.1                                                      |
|                                                     | 873.2 <sup>b</sup>                                    | 88.8                                                       |



### XIII. REFERENCES

- <sup>1</sup> Maeder, M.; King, P. Reactlab, Jplus Consulting Pty Ltd: East Freemantle, WA. Australia, 2009.
- <sup>2</sup> Connelly, N. G.; Geiger, W. E. "Chemical Redox Agents for Organometallic Chemistry." *Chem. Rev.* **1996**, *96* (2), 877-910.
- <sup>3</sup> Spinney, H. A.; Clough, C. R.; Cummins, C. C., The titanium tris-anilide cation [Ti(N[(t)Bu]Ar)<sub>3</sub>]<sup>(+)</sup> stabilized as its perfluoro-tetra-phenylborate salt: structural characterization and synthesis in connection with redox activity of 4,4'-bipyridine dititanium complexes. *Dalton Trans* **2015**, *44* (15), 6784-96.
- <sup>4</sup> Thomson, R. K.; Scott, B. L.; Morris, D. E.; Kiplinger, J. L. "Synthesis, structure, spectroscopy and redox energetics of a series of uranium(IV) mixed-ligand metallocene complexes." *C. R. Chimie* **2010**, *13* (6), 790-802.
- <sup>5</sup> Donoghue, P. J.; Tehranchi, J.; Cramer, C. J.; Sarangi, R.; Solomon, E. I.; Tolman, W. B., Rapid C–H Bond Activation by a Monocopper(III)–Hydroxide Complex. *Journal of the American Chemical Society* **2011**, *133* (44), 17602-17605.
- <sup>6</sup> Sanning, J.; Ewen, P. R.; Stegemann, L.; Schmidt, J.; Daniliuc, C. G.; Koch, T.; Doltsinis, N. L.; Wegner, D.; Strassert, C. A., Scanning-Tunneling-Spectroscopy-Directed Design of Tailored Deep-Blue Emitters. *Angewandte Chemie International Edition* **2015**, *54* (3), 786-791.
- <sup>7</sup> Stoll, S.; Schweiger, A. "EasySpin, a comprehensive software package for spectral simulation and analysis in EPR." *J. Magn. Reson.* **2006**, *178* (1), 42-55.

- <sup>8</sup> A 60 mL syringe was equipped with a PTFE syringe filter and packed with basic alumina to the 15 mL mark; CH<sub>2</sub>Cl<sub>2</sub> was passed through and immediately used.
- <sup>9</sup> Dhar, D.; Yee, G. M.; Spaeth, A. D.; Boyce, D. W.; Zhang, H.; Dereli, B.; Cramer, C. J.; Tolman, W. B., Perturbing the Copper(III)-Hydroxide Unit through Ligand Structural Variation. *J. Am. Chem. Soc.* **2016**, *138* (1), 356-68.
- <sup>10</sup> Zerk, T. J.; Saouma, C. T.; Mayer, J. M.; Tolman, W. B., Low Reorganization Energy for Electron Self-Exchange by a Formally Copper(III,II) Redox Couple. *Inorganic Chemistry* **2019**, *58* (20), 14151-14158.
- <sup>11</sup> Bruker, 2012. Bruker AXS Inc., Madison, Wisconsin, USA.
- <sup>12</sup> Bruker, 2001. Bruker AXS Inc., Madison, Wisconsin, USA.
- <sup>13</sup> Sheldrick, G. M., "SHELXT – Integrated space-group and crystal structure determination," *Acta. Cryst.* **2015**, *A71*, 3–8.
- <sup>14</sup> Sheldrick, G. M., "A short history of SHELX," *Acta. Cryst.* 2008, *A64*, 112–122.
- <sup>15</sup> Dolomanov, O.V.; Bourhis, L.J.; Gildea, R.J.; Howard, J.A.K.; Puschmann, H., "OLEX2: A complete structure solution, refinement and analysis program," *J. Appl. Cryst.* **2009**, *42*, 339–341.
- <sup>16</sup> Hubschle, C. B.; Sheldrick, G. M.; Dittrich, B., "ShelXle: a Qt graphical interface for SHELXL," *J. Appl. Cryst.* **2011**, *44*, 1281–1284.
- <sup>17</sup> F. Menges "Spectragryph - optical spectroscopy software", Version 1.2.14, 2020, <http://www.ffmpeg2.de/spectragryph/>

- <sup>18</sup> Spaeth, A. D.; Gagnon, N. L.; Dhar, D.; Yee, G. M.; Tolman, W. B., Determination of the Cu(III)-OH Bond Distance by Resonance Raman Spectroscopy Using a Normalized Version of Badger's Rule. *J Am Chem Soc* **2017**, *139* (12), 4477-4485.
- <sup>19</sup> Hayes, E. C.; Porter, T. R.; Barrows, C. J.; Kaminsky, W.; Mayer, J. M.; Stoll, S., Electronic Structure of a CuII-Alkoxide Complex Modeling Intermediates in Copper-Catalyzed Alcohol Oxidations. *Journal of the American Chemical Society* **2016**, *138* (12), 4132-4145.
- <sup>20</sup> C. Adamo and V. Barone, "Exchange functionals with improved long-range behavior and adiabatic connection methods without adjustable parameters: The mPW and mPW1PW models," *J. Chem. Phys.*, **1998**, *108*, 664-675. DOI: 10.1063/1.475428
- <sup>21</sup> Gaussian 16, Revision A.03, M. J. Frisch, G. W. Trucks, H. B. Schlegel, G. E. Scuseria, M. A. Robb, J. R. Cheeseman, G. Scalmani, V. Barone, G. A. Petersson, H. Nakatsuji, X. Li, M. Caricato, A. V. Marenich, J. Bloino, B. G. Janesko, R. Gomperts, B. Mennucci, H. P. Hratchian, J. V. Ortiz, A. F. Izmaylov, J. L. Sonnenberg, D. Williams-Young, F. Ding, F. Lipparini, F. Egidi, J. Goings, B. Peng, A. Petrone, T. Henderson, D. Ranasinghe, V. G. Zakrzewski, J. Gao, N. Rega, G. Zheng, W. Liang, M. Hada, M. Ehara, K. Toyota, R. Fukuda, J. Hasegawa, M. Ishida, T. Nakajima, Y. Honda, O. Kitao, H. Nakai, T. Vreven, K. Throssell, J. A. Montgomery, Jr., J. E. Peralta, F. Ogliaro, M. J. Bearpark, J. J. Heyd, E. N. Brothers, K. N. Kudin, V. N. Staroverov, T. A. Keith, R. Kobayashi, J. Normand, K. Raghavachari, A. P. Rendell, J. C. Burant, S. S. Iyengar, J. Tomasi, M. Cossi, J. M. Millam, M. Klene, C. Adamo, R. Cammi, J. W. Ochterski, R. L. Martin, K. Morokuma, O. Farkas, J. B. Foresman, and D. J. Fox, Gaussian, Inc., Wallingford CT, 2016.

- <sup>22</sup> Dolg, M.; Wedig, U.; Stoll, H.; Preuss, H. Energy-Adjusted Abinitio Pseudopotentials for the First Row Transition Elements. *J. Chem. Phys.* **1987**, *86*, 866-872.
- <sup>23</sup> Clark, T.; Chandrasekhar, J.; Spitznagel, G. W.; Schleyer, P. V. R. Efficient Diffuse Function-Augmented Basis Sets for Anion Calculations. III. The 3-21+G Basis Set for First-Row Elements, Li-F. **1983**, *4*, 294-301.
- <sup>24</sup> Krishnan, R.; Binkley, J. S.; Seeger, R.; Pople, J. A. Self-consistent molecular orbital methods. XX. A basis set for correlated wave functions. *J. Chem. Phys.* **1980**, *72*, 650-654.
- <sup>25</sup> Precomputed vibrational scaling factors. <https://cccbdb.nist.gov/vibscalejust.asp> (accessed Dec 26, 2020).
- <sup>26</sup> Becke, A. D. "Density-functional thermochemistry. V. Systematic optimization of exchange-correlation functionals," *J. Chem. Phys.*, **1997**, *107*, 8554-8560.
- <sup>27</sup> Schmider, H. L.; Becke, A. D. "Optimized density functionals from the extended G2 test set," *J. Chem. Phys.*, **1998**, *108*, 9624-9231.
